# Supplementary material for: Organocatalytic enantioselective decarboxylative protonation of α-alkyl-α-aryl malonate monoesters
Source: Royal Society of Chemistry journal article supplement (doi:10.1039/d3cc06018g), 2024-01-01
Supplement: d3cc06018g1.pdf [file d3cc06018g1.pdf]

# Supporting Information

## Organocatalytic Enantioselective Decarboxylative Protonation of $\alpha$ -Alkyl- $\alpha$ -Aryl Malonate Monoesters

Cong-Ying Guo, Jia-Zheng Chen, Wen-Ting, Liu, Hao Mei, Jie Meng, and Jian-Ping Chen\*

*Institute of Advanced Synthesis, School of Chemistry and Molecular Engineering, Nanjing Tech University, Nanjing 211816, China*

### Contents

|                                                                                                                                                    |    |
|----------------------------------------------------------------------------------------------------------------------------------------------------|----|
| 1. General information .....                                                                                                                       | 2  |
| 2. The procedure of preparation and corresponding spectral characterizations of $\alpha$ -alkyl- $\alpha$ -aryl malonate monoesters <b>1</b> ..... | 3  |
| 3. Representative procedure for the enantioselective decarboxylative protonation and spectral characterizations of the products <b>2</b> .....     | 12 |
| 4. Synthetic Applications .....                                                                                                                    | 21 |
| 5. Some pka values of our reaction related compounds .....                                                                                         | 24 |
| 6. Reference .....                                                                                                                                 | 25 |
| 7. $^1\text{H}$ NMR, $^{13}\text{C}$ NMR and HPLC Spectra Data .....                                                                               | 26 |

## 1. General information

All reagents and organic solvents were purchased from TCI, Sigma-Aldrich, Adamas-beta and Energy Chemical of the highest purity grade and used without further purification unless otherwise noted.  $^1\text{H}$  and  $^{13}\text{C}$  NMR spectra were recorded in  $\text{CDCl}_3$  on Bruker Avance or Joel 400 MHz spectrometers. The chemical shifts ( $\delta$ ) are reported in ppm and coupling constants ( $J$ ) in Hz. HRMS-ESI spectra were recorded on Waters Micromass GCT Premier. IR spectra were recorded on a FT-IR spectrophotometer using KBr optics. Melting points were measured without correction. HPLC spectra were measured using a Thermo 3000. The **C1** and **C6** catalysts were purchased from Adamas-beta and used without further purification. The known Cinchona alkaloid catalysts **C2-C5** were prepared according to literature method.<sup>1</sup> The chiral 1,2-*trans*-diaminocyclohexane derived organocatalysts **C7-C14** were synthesized based on the literature method.<sup>2</sup>

## 2. The procedure of preparation and corresponding spectral characterizations of $\alpha$ -alkyl- $\alpha$ -aryl malonate monoesters **1**

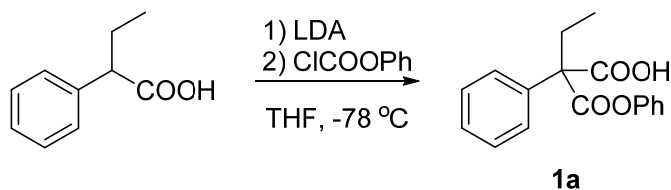

LDA (23 mL, 45.8 mmol, 2 M in hexanes) was added to a flame-dried round bottom flask containing anhydrous THF (60 mL) at  $-78\text{ }^{\circ}\text{C}$  under argon. A solution of 2-phenylbutanoic acid (3 g, 18.3 mmol) dissolved in THF (10 mL) was added dropwise to the LDA solution. The solution was allowed to warm to room temperature and stir for four hours. The solution was then cooled to  $-78\text{ }^{\circ}\text{C}$  and the dianion was allowed to react with phenylchloroformate (3.4 g, 22 mmol). The reaction was stirred overnight and quenched with HCl (3 M). Diethyl ether (25 mL) was added to the reaction mixture and two resulting phases were separated. The aqueous phase was acidified with 3 M HCl to pH = 3 and extracted three times with diethyl ether (20 mL) and the combined organic phases were washed three times with brine, and dried over anhydrous sodium sulfate. The solvent was removed in vacuo at  $-20\text{ }^{\circ}\text{C}$ . The remaining residue was purified by silica gel column chromatography (hexane/ethyl acetate =10/1) to afford the desired product **1a** as a white solid (2.3 g, 44%). (Note:  $\alpha$ -Alkyl- $\alpha$ -aryl substituted malonate phenyl monoesters demonstrate stability at  $-30\text{ }^{\circ}\text{C}$  when stored in a refrigerator. However, after a period of three weeks, less than 5% of the decarboxylative protonation product was observed. The racemic decarboxylative protonation product could be removed by washing the crude mixture with petroleum ether.)

**2-(phenoxycarbonyl)-2-phenylbutanoic acid (1a):** white solid, Mp:  $82\text{--}83\text{ }^{\circ}\text{C}$ .

**$^1\text{H}$  NMR (400 MHz,  $\text{CDCl}_3$ ):**  $\delta$  7.56 – 7.53 (m, 2H), 7.43 – 7.33 (m, 5H), 7.26 – 7.22 (m, 1H), 7.04 – 7.01 (m, 2H), 2.68 – 2.52 (m, 2H), 1.09 (t,  $J = 7.4\text{ Hz}$ , 3H).

**$^{13}\text{C}$  NMR (100 MHz,  $\text{CDCl}_3$ ):**  $\delta$  175.3, 170.7, 150.5, 136.1, 129.7, 128.8, 128.4, 127.8, 126.5, 121.3, 63.2, 28.6, 9.7.

**HRMS-ESI (m/z)** Calcd for  $\text{C}_{17}\text{H}_{17}\text{O}_4$  [(M + H) $^+$ ] 285.1121, Found: 285.1130.

**IR (KBr):**  $\nu$  ( $\text{cm}^{-1}$ ) 2980, 1744, 1618, 1592, 1492, 1457, 747, 589.

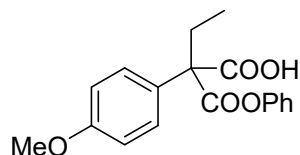

**2-(4-methoxyphenyl)-2-(phenoxycarbonyl)butanoic acid (1d)**

Compound **1d** was prepared according to the same procedure as the one used for **1a**.

Yield: 81%, white solid, Mp:  $81\text{--}83\text{ }^{\circ}\text{C}$ .

**$^1\text{H}$  NMR (400MHz,  $\text{CDCl}_3$ ):**  $\delta$  7.46 – 7.43 (m, 2H), 7.38 (t,  $J = 7.9\text{ Hz}$ , 2H), 7.28 - 7.24 (m, 1H), 7.01 (d,  $J = 7.8\text{ Hz}$ , 2H), 6.95 – 6.92 (m, 2H), 3.82 (s, 3H), 2.71 – 2.51 (m, 2H), 1.11 (t,  $J = 7.4\text{ Hz}$ , 3H).

$^{13}\text{C}$  NMR (100MHz,  $\text{CDCl}_3$ ):  $\delta$  175.6, 170.8, 159.4, 150.5, 129.7, 129.2, 127.8, 126.4, 121.3, 114.1, 62.4, 55.4, 28.4, 9.7.

HRMS-ESI (m/z) Calcd for  $\text{C}_{18}\text{H}_{19}\text{O}_5$  [(M + H) $^+$ ] 315.1227, Found: 315.1238.

IR (KBr):  $\nu$  ( $\text{cm}^{-1}$ ) 3474, 2938, 1742, 1713, 1591, 1254, 829, 799.

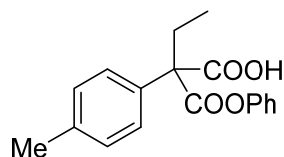

### 2-(phenoxycarbonyl)-2-(p-tolyl)butanoic acid (1e)

Compound **1e** was prepared according to the same procedure as the one used for **1a**. Yield: 78%, white solid, Mp: 90–91 °C.

$^1\text{H}$  NMR (400 MHz,  $\text{CDCl}_3$ ):  $\delta$  7.42 – 7.36 (m, 4H), 7.28 – 7.21 (m, 3H), 7.03 – 7.00 (m, 2H), 2.71 – 2.51 (m, 2H), 2.36 (s, 3H), 1.11 (t,  $J$  = 7.4 Hz, 3H).

$^{13}\text{C}$  NMR (100 MHz,  $\text{CDCl}_3$ ):  $\delta$  175.3, 171.0, 150.5, 138.2, 133.0, 129.6, 129.5, 127.7, 126.5, 121.3, 62.8, 28.5, 21.2, 9.7.

HRMS-ESI (m/z) Calcd for  $\text{C}_{18}\text{H}_{19}\text{O}_4$  [(M + H) $^+$ ] 299.1278, Found: 299.1284.

IR (KBr):  $\nu$  ( $\text{cm}^{-1}$ ) 3446, 1706, 1650, 1630, 1592, 815, 764, 749.

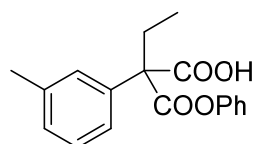

### 2-(phenoxycarbonyl)-2-(m-tolyl)butanoic acid (1f)

Compound **1f** was prepared according to the same procedure as the one used for **1a**. Yield: 57%, white solid, Mp: 66–67 °C.

$^1\text{H}$  NMR (400 MHz,  $\text{CDCl}_3$ ):  $\delta$  7.37 – 7.21 (m, 6H), 7.15 (d,  $J$  = 7.3 Hz, 1H), 7.03 (d,  $J$  = 8.5 Hz, 2H), 2.63 – 2.52 (m, 2H), 2.37 (s, 3H), 1.08 (t,  $J$  = 7.4 Hz, 3H).

$^{13}\text{C}$  NMR (100 MHz,  $\text{CDCl}_3$ ):  $\delta$  175.1, 170.9, 150.5, 138.4, 136.0, 129.6, 129.1, 128.6, 128.4, 126.5, 124.8, 121.3, 63.1, 28.6, 21.8, 9.8.

HRMS-ESI (m/z) Calcd for  $\text{C}_{18}\text{H}_{19}\text{O}_4$  [(M + H) $^+$ ] 299.1278, Found: 299.1283.

IR (KBr):  $\nu$  ( $\text{cm}^{-1}$ ) 3473, 2979, 1743, 1710, 1591, 1491, 782, 748.

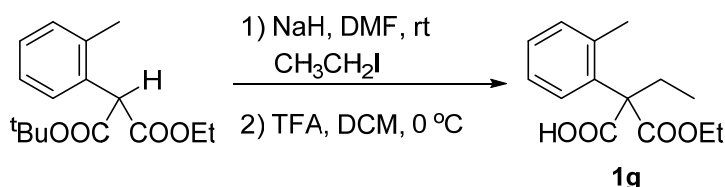

1-(*tert*-butyl) 3-ethyl 2-(*o*-tolyl) malonate (583 mg, 3.1 mmol) was slowly added to a suspension of NaH (126 mg, 3.15 mmol) in 10 mL of DMF at 0 °C. After the solution was stirred for 0.5 h at room temperature, ethyl iodide (983 mg, 6.3 mmol) was added and the mixture was stirred at rt overnight. Then the solution was quenched with saturated  $\text{NH}_4\text{Cl}$  solution. Diethyl ether (25 mL) was added to the reaction mixture and extracted three times with diethyl ether (20 mL) and the combined organic phases were washed three times with brine, and dried over anhydrous sodium sulfate. The

solvent was removed in vacuo. The remaining residue was purified by silica gel column chromatography (hexane/ethyl acetate = 20/1) to afford the alkylated product. A solution of the alkylated product in dry CH<sub>2</sub>Cl<sub>2</sub> (1.5 mL) was treated with TFA (0.98 mL, 12.7 mmol), and the reaction was stirred at 0 °C for 10 h. The reaction was concentrated in vacuo, the remaining residue was purified by column chromatography with 5% MeOH in CH<sub>2</sub>Cl<sub>2</sub> to afford the desired product **1g** (180 mg, 34%, Colorless oil).

**2-(ethoxycarbonyl)-2-(o-tolyl)butanoic acid (1g)**

**<sup>1</sup>H NMR (400MHz, CDCl<sub>3</sub>):** δ 7.49 – 7.47 (m, 1H), 7.28 – 7.21 (m, 2H), 7.15 – 7.13 (m, 1H), 4.33 – 4.15 (m, 2H), 2.62 – 2.53 (m, 1H), 2.47 – 2.38 (m, 1H), 2.17 (s, 3H), 1.18 (t, *J* = 7.1 Hz, 3H), 1.08 (t, *J* = 7.5 Hz, 3H).

**<sup>13</sup>C NMR (100MHz, CDCl<sub>3</sub>):** δ 177.8, 172.1, 136.7, 136.0, 131.6, 128.1, 126.7, 126.5, 63.5, 60.1, 30.9, 20.0, 13.8, 9.6.

**HRMS-ESI (m/z)** Calcd for C<sub>14</sub>H<sub>19</sub>O<sub>4</sub> [(M + H)<sup>+</sup>] 251.1278, Found: 251.1285.

**IR (KBr):** ν (cm<sup>-1</sup>) 3473, 2985, 1737, 1637, 1488, 1456, 765, 749.

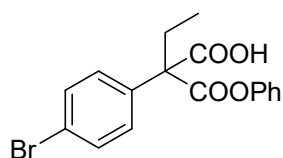

**2-(4-bromophenyl)-2-(phenoxycarbonyl)butanoic acid (1h)**

Compound **1h** was prepared according to the same procedure as the one used for **1a**. Yield: 53%, white solid, Mp: 87–89 °C.

**<sup>1</sup>H NMR (400 MHz, CDCl<sub>3</sub>):** δ 7.55 (dd, *J* = 8.7, 2.0 Hz, 2H), 7.44 – 7.37 (m, 4H), 7.29 – 7.25(m,1H), 7.01 – 7.00 (m, 2H), 2.65 – 2.50 (m, 2H), 1.10 – 1.06 (m, 3H).

**<sup>13</sup>C NMR (100 MHz, CDCl<sub>3</sub>):** δ 175.3, 169.7, 150.4, 134.8, 131.9, 129.8, 129.7, 126.6, 122.7, 121.2, 62.8, 28.5, 9.5.

**HRMS-ESI (m/z)** Calcd for C<sub>17</sub>H<sub>16</sub>BrO<sub>4</sub> [(M + H)<sup>+</sup>] 363.0226, Found: 363.0232.

**IR (KBr):** ν (cm<sup>-1</sup>) 3063, 1744, 1713, 1592, 1492, 1457, 1387, 747, 689.

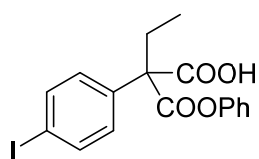

**2-(4-iodophenyl)-2-(phenoxycarbonyl)butanoic acid (1i)**

Compound **1i** was prepared according to the same procedure as the one used for **1a**. Yield: 65%, white solid, Mp: 92–94 °C.

**<sup>1</sup>H NMR (400 MHz, CDCl<sub>3</sub>):** δ 7.76 – 7.72 (m, 2H), 7.40 – 7.35 (m, 2H), 7.31 – 7.24 (m, 3H), 7.03 – 7.01 (m, 2H), 2.63 – 2.48 (m, 2H), 1.07 (t, *J* = 7.4 Hz, 3H).

**<sup>13</sup>C NMR (100 MHz, CDCl<sub>3</sub>):** δ 175.1, 169.7, 150.4, 137.8, 135.6, 129.9, 129.7, 126.6, 121.2, 94.4, 62.9, 28.4, 9.5.

**HRMS-ESI (m/z)** Calcd for C<sub>17</sub>H<sub>16</sub>IO<sub>4</sub> [(M + H)<sup>+</sup>] 411.0088, Found: 411.0089.

**IR (KBr):** ν (cm<sup>-1</sup>) 3447, 1739, 1713, 1592, 1489, 817, 745, 687.

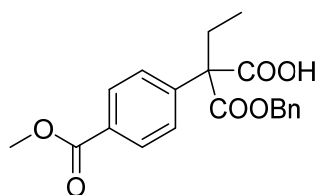

### 2-((benzyloxy)carbonyl)-2-(4-(methoxycarbonyl)phenyl)butanoic acid (**1j**)

Compound **1j** was prepared according to the same procedure as the one used for **1g**.  
Yield: 81%, colorless oil.

**<sup>1</sup>H NMR (400 MHz, CDCl<sub>3</sub>):**  $\delta$  8.02 – 7.96 (m, 2H), 7.45 – 7.39 (m, 2H), 7.32 (dd,  $J$  = 4.8, 2.0 Hz, 3H), 7.23 (dd,  $J$  = 6.5, 3.1 Hz, 2H), 5.28 – 5.18 (m, 2H), 3.92 (s, 3H), 2.60 – 2.48 (m, 1H), 2.45 – 2.36 (m, 1H), 0.91 (t,  $J$  = 7.3 Hz, 3H).

**<sup>13</sup>C NMR (100 MHz, CDCl<sub>3</sub>):**  $\delta$  173.7, 172.0, 166.7, 141.3, 134.4, 129.7, 129.6, 128.6, 128.6, 128.2, 127.6, 68.2, 62.8, 52.3, 28.5, 9.4.

**HRMS-ESI (m/z)** Calcd for C<sub>20</sub>H<sub>20</sub>O<sub>6</sub> [(M + Na)<sup>+</sup>] 379.1152, Found: 379.1152.

**IR (KBr):**  $\nu$  (cm<sup>-1</sup>) 3676, 2953 1725 1610, 1438, 1282, 745, 597.

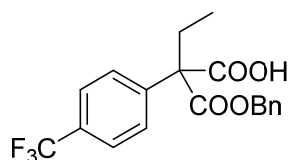

### 2-((benzyloxy)carbonyl)-2-(4-(trifluoromethyl)phenyl)butanoic acid (**1k**)

Compound **1k** was prepared according to the same procedure as the one used for **1g**.  
Yield: 82%, white solid.

**<sup>1</sup>H NMR (400MHz, CDCl<sub>3</sub>):**  $\delta$  7.58 (d,  $J$  = 8.3 Hz, 2H), 7.49 (d,  $J$  = 8.4 Hz, 2H), 7.31 (dd,  $J$  = 5.0, 2.1 Hz, 3H), 7.22 (dd,  $J$  = 6.7, 2.9 Hz, 2H), 5.27 – 5.11 (m, 2H), 2.50 – 2.40 (m, 2H), 0.90 (t,  $J$  = 7.4 Hz, 3H).

**<sup>13</sup>C NMR (100MHz, CDCl<sub>3</sub>):**  $\delta$  173.9, 171.7, 140.2, 134.5, 130.2 (q,  $J$  = 32.8), 128.7, 128.6, 128.2, 128.1, 125.4, 125.4, 123.8 (q,  $J$  = 272.3), 68.1, 62.7, 28.5, 9.4.

**HRMS-ESI (m/z)** Calcd for C<sub>19</sub>H<sub>17</sub>F<sub>3</sub>O<sub>4</sub> [(M + Na)<sup>+</sup>] 389.0971, Found: 389.0970.

**IR (KBr):**  $\nu$  (cm<sup>-1</sup>) 2979, 1741, 1705, 1327, 1218, 1126, 887, 749.

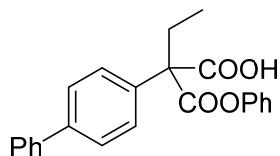

### 2-([1,1'-biphenyl]-4-yl)-2-(phenoxycarbonyl)butanoic acid (**1l**)

Compound **1l** was prepared according to the same procedure as the one used for **1a**.  
Yield: 66%, white solid, Mp: 93–94 °C.

**<sup>1</sup>H NMR (400 MHz, CDCl<sub>3</sub>):**  $\delta$  7.65 – 7.59 (m, 6H), 7.45 (t,  $J$  = 7.5 Hz, 2H), 7.37 (q,  $J$  = 8.1 Hz, 3H), 7.28 – 7.24 (m, 1H), 7.06 (d,  $J$  = 8.0 Hz, 2H), 2.74 – 2.57 (m, 2H), 1.14 (t,  $J$  = 4.0 Hz, 3H).

**<sup>13</sup>C NMR (100 MHz, CDCl<sub>3</sub>):**  $\delta$  175.0, 170.8, 150.5, 141.2, 140.4, 135.0, 129.7, 129.0, 128.3, 127.7, 127.5, 127.3, 126.6, 121.3, 62.9, 28.6, 9.8.

**HRMS-ESI (m/z)** Calcd for C<sub>23</sub>H<sub>21</sub>O<sub>4</sub> [(M + H)<sup>+</sup>] 361.1434, Found: 361.1446.

**IR (KBr):**  $\nu$  (cm<sup>-1</sup>) 3474, 2979, 1743, 1710, 1618, 1591, 1488, 834, 764, 749.

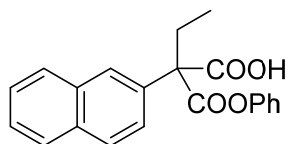

### 2-(naphthalen-2-yl)-2-(phenoxy-carbonyl)butanoic acid (1m)

Compound **1m** was prepared according to the same procedure as the one used for **1a**. Yield: 73%, white solid, Mp: 79–81 °C.

$^1\text{H NMR}$  (400 MHz,  $\text{CDCl}_3$ ):  $\delta$  8.02 (d,  $J = 1.3$  Hz, 1H), 7.89 – 7.83 (m, 3H), 7.61 (dd,  $J = 8.7, 1.9$  Hz, 1H), 7.53 – 7.50 (m, 2H), 7.37 (t,  $J = 7.9$  Hz, 2H), 7.25 (t,  $J = 7.4$  Hz, 1H), 7.02 (d,  $J = 7.9$  Hz, 2H), 2.82 – 2.65 (m, 2H), 1.16 (t,  $J = 7.4$  Hz, 3H).

$^{13}\text{C NMR}$  (100 MHz,  $\text{CDCl}_3$ ):  $\delta$  174.6, 170.9, 150.5, 133.5, 133.2, 132.9, 129.7, 128.5, 128.4, 127.6, 127.0, 126.8, 126.6, 126.5, 125.6, 121.3, 63.2, 28.7, 9.8.

HRMS-ESI (m/z) Calcd for  $\text{C}_{21}\text{H}_{19}\text{O}_4$  [(M + H) $^+$ ] 335.1278, Found: 335.1287.

IR (KBr):  $\nu$  ( $\text{cm}^{-1}$ ) 3454, 1647, 1632, 1492, 1457, 815, 745, 688.

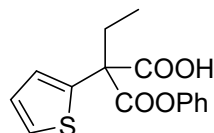

### 2-(phenoxy-carbonyl)-2-(thiophen-2-yl)butanoic acid (1n)

Compound **1n** was prepared according to the same procedure as the one used for **1a**. Yield: 59%, white solid, Mp: 72–73 °C.

$^1\text{H NMR}$  (400 MHz,  $\text{CDCl}_3$ ):  $\delta$  7.40 – 7.35 (m, 3H), 7.27 – 7.24 (m, 2H), 7.09 – 7.04 (m, 3H), 2.68 – 2.53 (m, 2H), 1.05 (t,  $J = 7.4$  Hz, 3H).

$^{13}\text{C NMR}$  (100 MHz,  $\text{CDCl}_3$ ):  $\delta$  174.3, 168.9, 150.5, 138.1, 129.6, 127.2, 126.6, 126.5, 126.5, 121.2, 60.7, 31.0, 9.4.

HRMS-ESI (m/z) Calcd for  $\text{C}_{15}\text{H}_{15}\text{SO}_4$  [(M + H) $^+$ ] 291.0686, Found: 291.0688.

IR (KBr):  $\nu$  ( $\text{cm}^{-1}$ ) 3474, 2977, 1719, 1592, 1491, 1457, 747, 703.

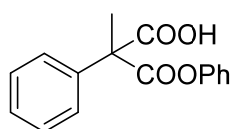

### 2-methyl-3-oxo-3-phenoxy-2-phenylpropanoic acid (1o)

Compound **1o** was prepared according to the same procedure as the one used for **1a**. Yield: 75%, white solid, Mp: 76–77 °C.

$^1\text{H NMR}$  (400 MHz,  $\text{CDCl}_3$ ):  $\delta$  7.54 – 7.51 (m, 2H), 7.42 – 7.33 (m, 5H), 7.24 – 7.20 (m, 1H), 7.08 – 7.06 (m, 2H), 2.06 (s, 3H).

$^{13}\text{C NMR}$  (100 MHz,  $\text{CDCl}_3$ ):  $\delta$  177.3, 170.1, 150.7, 137.0, 129.6, 128.6, 128.4, 127.6, 126.4, 121.3, 58.9, 22.0.

HRMS-ESI (m/z) Calcd for  $\text{C}_{16}\text{H}_{15}\text{O}_4$  [(M + H) $^+$ ] 271.0965, Found: 271.0973.

IR (KBr):  $\nu$  ( $\text{cm}^{-1}$ ) 3271, 1747, 1713, 1591, 1492, 1457, 745, 694.

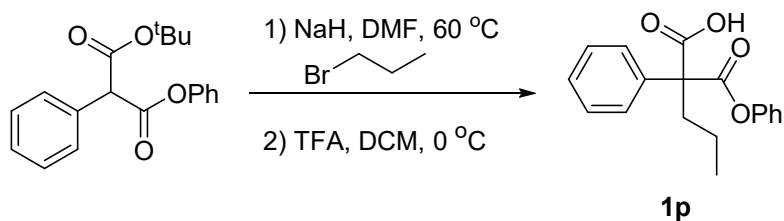

### 2-(phenoxycarbonyl)-2-phenylpentanoic acid (**1p**)

Compound **1p** was prepared according to the same procedure as the one used for **1g**.  
Yield: 31%, white solid, Mp: 66–67 °C.

**<sup>1</sup>H NMR (400 MHz, CDCl<sub>3</sub>):** δ 7.54 (d, *J* = 7.8 Hz, 2H), 7.42 – 7.33 (m, 5H), 7.26 – 7.22 (m, 1H), 7.02 (d, *J* = 8.0 Hz, 2H), 2.54 – 2.46 (m, 2H), 1.47 – 1.44 (m, 2H), 1.03 (t, *J* = 7.3 Hz, 3H).

**<sup>13</sup>C NMR (100 MHz, CDCl<sub>3</sub>):** δ 174.7, 171.2, 150.4, 136.4, 129.7, 128.8, 128.3, 127.6, 126.5, 121.2, 62.5, 37.5, 18.7, 14.5.

**HRMS-ESI (m/z)** Calcd for C<sub>18</sub>H<sub>19</sub>O<sub>4</sub> [(M + H)<sup>+</sup>] 299.1278, Found: 299.1284.

**IR (KBr):** ν (cm<sup>-1</sup>) 3412, 2965, 1743, 1710, 1591, 1492, 1448, 744, 689.

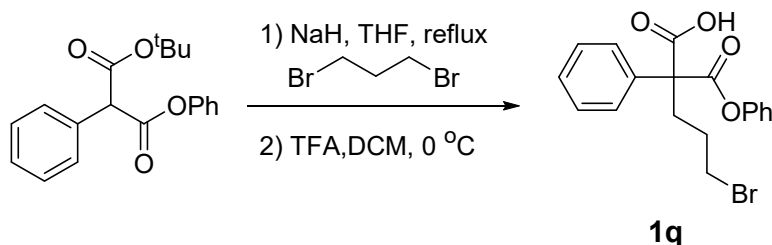

### 5-bromo-2-(phenoxycarbonyl)-2-phenylpentanoic acid (**1q**)

Compound **1q** was prepared according to the same procedure as the one used for **1g**.  
Yield: 30%, white solid, Mp: 117–119 °C.

**<sup>1</sup>H NMR (400 MHz, CDCl<sub>3</sub>):** δ 7.55 – 7.52 (m, 2H), 7.44 – 7.34 (m, 5H), 7.26 – 7.23 (m, 1H), 7.07 – 7.04 (m, 2H), 3.50 – 3.41 (m, 2H), 2.69 – 2.65 (m, 2H), 2.07 – 1.90 (m, 2H).

**<sup>13</sup>C NMR (100 MHz, CDCl<sub>3</sub>):** δ 174.6, 170.1, 150.4, 135.8, 129.7, 128.9, 128.5, 127.7, 126.5, 121.2, 62.2, 34.3, 33.3, 28.3.

**HRMS-ESI (m/z)** Calcd for C<sub>18</sub>H<sub>18</sub>BrO<sub>4</sub> [(M + H)<sup>+</sup>] 377.0383, Found: 377.0390.

**IR (KBr):** ν (cm<sup>-1</sup>) 3413, 3063, 1743, 1715, 1590, 1491, 1447, 766, 748.

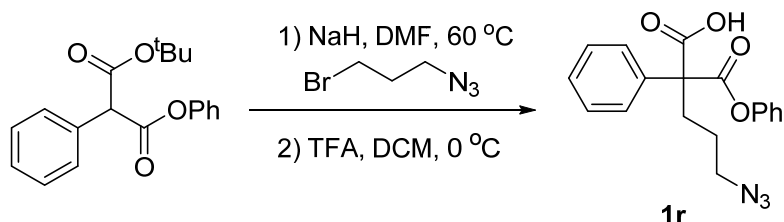

### 5-azido-2-(phenoxycarbonyl)-2-phenylpentanoic acid (**1r**)

Compound **1r** was prepared according to the same procedure as the one used for **1g**.  
Yield: 35%, white solid, Mp: 55–57 °C.



**<sup>1</sup>H NMR (400 MHz, CDCl<sub>3</sub>):** δ 7.51 (d, *J* = 7.5 Hz, 2H), 7.45 – 7.37 (m, 5H), 7.28 – 7.25 (m, 1H), 7.05 – 7.03 (m, 2H), 3.46 – 3.34 (m, 2H), 2.64 – 2.57 (m, 2H), 1.77 – 1.68 (m, 2H).

**<sup>13</sup>C NMR (100 MHz, CDCl<sub>3</sub>):** δ 174.7, 170.2, 150.4, 135.7, 129.7, 128.9, 128.5, 127.6, 126.6, 121.2, 62.3, 51.4, 32.8, 24.8.

**HRMS-ESI (m/z)** Calcd for C<sub>18</sub>H<sub>18</sub>N<sub>3</sub>O<sub>4</sub> [(M + H)<sup>+</sup>] 340.1292, Found: 340.1291.

**IR (KBr):** ν (cm<sup>-1</sup>) 2936, 2098, 1744, 1591, 1492, 1448, 746, 689.

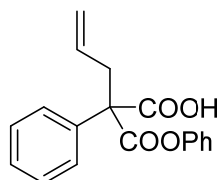

### 2-(4-isobutylphenyl)-2-phenylpent-4-enoic acid (1s)

Compound **1s** was prepared according to the same procedure as the one used for **1g**. Yield: 44%, white solid, Mp: 76–77 °C.

**<sup>1</sup>H NMR (400 MHz, CDCl<sub>3</sub>):** δ 7.55 – 7.53 (m, 2H), 7.44 – 7.35 (m, 5H), 7.27 – 7.23 (m, 1H), 7.01 (d, *J* = 8.2 Hz, 2H), 5.96 – 5.85 (m, 1H), 5.31 – 5.20 (m, 2H), 3.37 (dd, *J* = 14.1, 6.7 Hz, 1H), 3.25 (dd, *J* = 14.0, 7.6 Hz, 1H).

**<sup>13</sup>C NMR (100 MHz, CDCl<sub>3</sub>):** δ 173.4, 171.2, 150.4, 136.0, 132.2, 129.7, 128.9, 128.5, 127.5, 126.6, 121.2, 120.2, 62.4, 39.9.

**HRMS-ESI (m/z)** Calcd for C<sub>18</sub>H<sub>17</sub>O<sub>4</sub> [(M + H)<sup>+</sup>] 297.1121, Found: 297.1126.

**IR (KBr):** ν (cm<sup>-1</sup>) 3063, 1747, 1713, 1629, 1591, 1492, 796, 746.

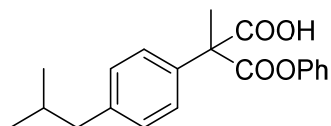

### 2-(4-isobutylphenyl)-2-methyl-3-oxo-3-phenoxypropanoic acid (1t)

Compound **1t** was prepared according to the same procedure as the one used for **1a**. Yield: 53%, white solid, Mp: 60–62 °C.

**<sup>1</sup>H NMR (400 MHz, CDCl<sub>3</sub>):** δ 7.43 (d, *J* = 8.2 Hz, 2H), 7.35 (t, *J* = 7.9 Hz, 2H), 7.24 – 7.16 (m, 3H), 7.07 (d, *J* = 7.6 Hz, 2H), 2.48 (d, *J* = 7.2 Hz, 2H), 2.05 (s, 3H), 1.92 – 1.82 (m, 1H), 0.91 (d, *J* = 7.6 Hz, 6H).

**<sup>13</sup>C NMR (100 MHz, CDCl<sub>3</sub>):** δ 177.2, 170.4, 150.8, 141.9, 134.2, 129.6, 129.4, 127.3, 126.3, 121.3, 58.6, 45.1, 30.2, 22.6, 22.1.

**HRMS-ESI (m/z)** Calcd for C<sub>20</sub>H<sub>23</sub>O<sub>4</sub> [(M + H)<sup>+</sup>] 327.1591, Found: 327.1604.

**IR (KBr):** ν (cm<sup>-1</sup>) 3412, 2954, 1748, 1713, 1592, 1514, 1383, 739, 687.

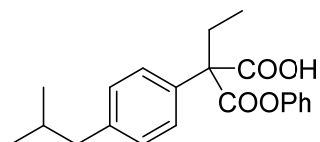

### 2-(4-isobutylphenyl)-2-(phenoxycarbonyl)butanoic acid (1u)

Compound **1u** was prepared according to the same procedure as the one used for **1a**. Yield: 56%, white solid, Mp: 68–70 °C.

**<sup>1</sup>H NMR (400 MHz, CDCl<sub>3</sub>):** δ 7.43 (d, *J* = 8.2 Hz, 2H), 7.38 – 7.34 (m, 2H), 7.25 – 7.22 (m, 1H), 7.17 (d, *J* = 8.3 Hz, 2H), 7.02 (d, *J* = 7.9 Hz, 2H), 2.66 – 2.50 (m, 2H), 2.47 (d, *J* = 7.2 Hz, 2H), 1.90 – 1.82 (m, 1H), 1.08 (t, *J* = 7.4 Hz, 3H), 0.90 (d, *J* = 6.6 Hz, 6H).

**<sup>13</sup>C NMR (100 MHz, CDCl<sub>3</sub>):** δ 174.5, 171.4, 150.4, 141.9, 133.4, 129.6, 129.5, 127.3, 126.5, 121.2, 62.8, 45.1, 30.2, 28.6, 22.5, 9.8.

**HRMS-ESI (m/z)** Calcd for C<sub>21</sub>H<sub>25</sub>O<sub>4</sub> [(M + H)<sup>+</sup>] 341.1747, Found: 341.1758.

**IR (KBr):** ν (cm<sup>-1</sup>) 3414, 1746, 1710, 1638, 1618, 1492, 764, 749.

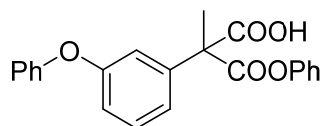

### 2-methyl-3-oxo-3-phenoxy-2-(3-phenoxyphenyl)propanoic acid (1v)

Compound **1v** was prepared according to the same procedure as the one used for **1a**. Yield: 56%, white solid, Mp: 116–117 °C.

**<sup>1</sup>H NMR (400 MHz, CDCl<sub>3</sub>):** δ 7.37 – 7.30 (m, 5H), 7.27 – 7.20 (m, 3H), 7.09 (t, *J* = 7.4 Hz, 1H), 7.02 (d, *J* = 8.4 Hz, 4H), 6.98 (dd, *J* = 8.0, 2.1 Hz, 1H), 2.04 (s, 3H).

**<sup>13</sup>C NMR (100 MHz, CDCl<sub>3</sub>):** δ 176.7, 169.8, 157.4, 157.0, 150.6, 138.9, 130.0, 129.9, 129.6, 126.4, 123.6, 122.4, 121.3, 119.1, 118.5, 118.5, 58.8, 22.1.

**HRMS-ESI (m/z)** Calcd for C<sub>22</sub>H<sub>19</sub>O<sub>5</sub> [(M + H)<sup>+</sup>] 363.1227, Found: 363.1232.

**IR (KBr):** ν (cm<sup>-1</sup>) 3451, 1747, 1714, 1592, 1488, 1223, 750, 689.

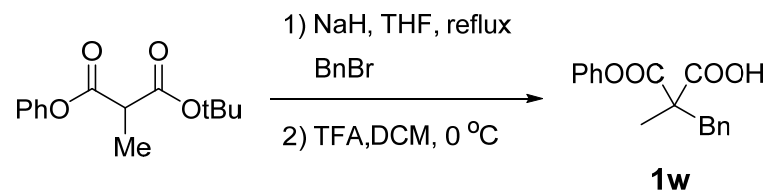

### 2-benzyl-2-methyl-3-oxo-3-phenoxypropanoic acid (1w)

Compound **1w** was prepared according to the same procedure as the one used for **1g**. Yield: 52%, white solid.

**<sup>1</sup>H NMR (400 MHz, CDCl<sub>3</sub>)** δ 7.39 (t, *J* = 7.9 Hz, 2H), 7.33 – 7.26 (m, 6H), 7.06 (d, *J* = 7.8 Hz, 2H), 3.47 (d, *J* = 13.7 Hz, 1H), 3.32 (d, *J* = 13.7 Hz, 1H), 1.57 (s, 3H).

**<sup>13</sup>C NMR (100 MHz, CDCl<sub>3</sub>)** δ 178.0, 170.2, 150.6, 135.5, 130.5, 129.6, 128.5, 127.4, 126.3, 121.4, 55.3, 41.2, 20.1.

**HRMS-ESI (m/z)** calcd for C<sub>17</sub>H<sub>16</sub>O<sub>4</sub>Na [(M + Na)<sup>+</sup>] 309.0941, found 309.0947.

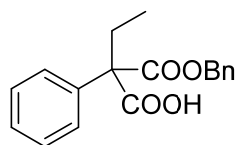

### 2-((benzyloxy)carbonyl)-2-phenylbutanoic acid (1b)

Compound **1b** was prepared according to the same procedure as the one used for **1a**. Yield: 88%, white solid, Mp: 79–80 °C.

**<sup>1</sup>H NMR (400 MHz, CDCl<sub>3</sub>):** δ 7.36 – 7.30 (m, 8H), 7.23 – 7.21 (m, 2H), 5.22 (q, *J* = 12.3 Hz, 2H), 2.57 – 2.35 (m, 2H), 0.91 (t, *J* = 7.3 Hz, 3H);

**<sup>13</sup>C NMR (100 MHz, CDCl<sub>3</sub>):** δ 173.8, 173.4, 136.8, 134.7, 128.7, 128.7, 128.3, 128.2, 127.2, 68.2, 62.7, 28.6, 9.8.

**HRMS-ESI (m/z)** Calcd for C<sub>18</sub>H<sub>18</sub>O<sub>4</sub>Na [(M + Na)<sup>+</sup>] 321.1097, Found: 321.1103.

**IR (KBr):** ν (cm<sup>-1</sup>) 3446, 2977, 1735, 1711, 1601, 1498, 1455, 735, 696.

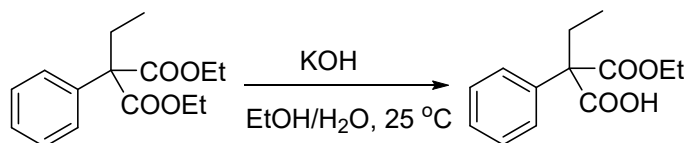

**1c**

A solution of 1.27 g (22.7 mmol) of KOH in 11 mL of H<sub>2</sub>O is added dropwise to a solution of 3.0 g (11.4 mmol) of diethyl 2-ethyl-2-phenylmalonate in 26 mL of cold ethanol (0-5 °C). Agitation is continued for 24 hours at 25 °C and the solvent is evaporated off. The residue is separated with H<sub>2</sub>O and diethylether. After decantation, the aqueous layer is acidified at 0 °C with 3N HCl and extracted with diethylether (50 mL × 2). The solution was evaporated in vacuo, the remaining residue was purified by recrystallization with PE and DCM to afford the desired product **1c** as a white solid (2 g, 74%).

**<sup>1</sup>H NMR (400 MHz, CDCl<sub>3</sub>):** δ 7.40 – 7.31 (m, 5H), 4.36 – 4.22 (m, 2H), 2.61 – 2.52 (m, 1H), 2.43 – 2.34 (m, 1H), 1.26 (t, *J* = 7.1 Hz, 3H), 0.98 (t, *J* = 7.3 Hz, 3H).

**<sup>13</sup>C NMR (100 MHz, CDCl<sub>3</sub>):** δ 174.8, 173.0, 137.2, 128.8, 128.2, 126.9, 62.9, 62.5, 28.7, 13.9, 9.9.

**HRMS-ESI (m/z)** Calcd for C<sub>13</sub>H<sub>17</sub>O<sub>4</sub> [(M + H)<sup>+</sup>] 237.1121, Found: 237.1123.

**IR (KBr):** ν (cm<sup>-1</sup>) 3509, 2981, 1708, 1601, 1498, 1447, 760, 697.

### 3. Representative procedure for the enantioselective decarboxylative protonation and spectral characterizations of the products 2

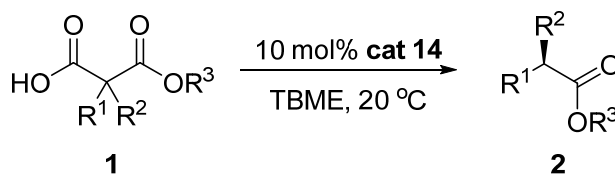

To a mixture of catalyst **C14** (0.01 mmol), disubstituted malonic acid half-esters **1** (0.1 mmol) in a vial (4.0 mL) were added TBME (1.0 mL). Then the reaction mixture was stirred at 20 °C and was monitored by TLC. After completion, the reaction mixture was concentrated in vacuo, and the remaining residue was purified by silica gel column chromatography (hexane/ethyl acetate) to afford the desired product **2**.

#### (*R*)-phenyl-2-phenylbutanoate (**2a**):

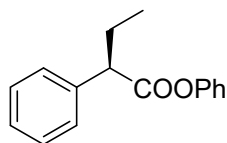

Yield: 98%; ee: 91%.

Colorless oil,  $[\alpha]_{\text{D}}^{20} = -68^{\circ}$  (0.44,  $\text{CHCl}_3$ ).

**$^1\text{H NMR}$  (400 MHz,  $\text{CDCl}_3$ ):**  $\delta$  7.42 – 7.28 (m, 7H), 7.19 (t,  $J = 7.5$  Hz, 1H), 7.00 – 6.98 (m, 2H), 3.70 (t,  $J = 7.7$  Hz, 1H), 2.28 – 2.17 (m, 1H), 1.96 – 1.85 (m, 1H), 1.00 (t,  $J = 7.4$  Hz, 3H).

**$^{13}\text{C NMR}$  (100 MHz,  $\text{CDCl}_3$ ):**  $\delta$  172.7, 150.9, 138.7, 129.5, 128.9, 128.2, 127.5, 125.9, 121.6, 53.6, 26.9, 12.3.

**HRMS-ESI** ( $m/z$ ) Calcd for  $\text{C}_{16}\text{H}_{17}\text{O}_2$  [ $(\text{M} + \text{H})^+$ ] 241.1223, Found: 241.1229.

**IR (KBr):**  $\nu$  ( $\text{cm}^{-1}$ ) 3478, 2966, 1754, 1618, 1592, 1491, 764, 748.

**HPLC:** Chiralcel OJ-H (25 cm  $\times$  0.46 cm), hexane/2-propanol = 90/10, 1.0 mL/min, 210 nm, 25 °C,  $t_{\text{R}} = 8.72$  min (minor), 10.09 min (major).

#### (*R*)-phenyl-2-(4-methoxyphenyl) butanoate (**2d**):

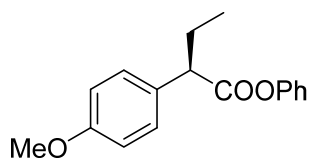

Yield: 96%; ee: 91%.

Colorless oil,  $[\alpha]_{\text{D}}^{20} = -65^{\circ}$  (0.23,  $\text{CHCl}_3$ ).

**$^1\text{H NMR}$  (400 MHz,  $\text{CDCl}_3$ ):**  $\delta$  7.35 – 7.31 (m, 4H), 7.21 – 7.17 (m, 1H), 6.99 – 6.97 (m, 2H), 6.91 – 6.89 (m, 2H), 3.81 (s, 3H), 3.64 (t,  $J = 7.7$  Hz, 1H), 2.25 – 2.14 (m, 1H), 1.93 – 1.82 (m, 1H), 0.99 (t,  $J = 7.4$  Hz, 3H).

**$^{13}\text{C NMR}$  (100 MHz,  $\text{CDCl}_3$ ):**  $\delta$  172.9, 159.0, 150.9, 130.7, 129.4, 129.1, 125.8, 121.6, 114.2, 55.4, 52.7, 26.8, 12.2.

**HRMS-ESI** ( $m/z$ ) Calcd for  $\text{C}_{17}\text{H}_{19}\text{O}_3$  [ $(\text{M} + \text{H})^+$ ] 271.1329, Found: 271.1338.

**IR (KBr):**  $\nu$  ( $\text{cm}^{-1}$ ) 3414, 2932, 1753, 1610, 1592, 1511, 1252, 816, 750.

**HPLC:** Chiralcel OJ-H (25 cm  $\times$  0.46 cm), hexane/2-propanol = 90/10, 1.0 mL/min,

204 nm, 25 °C,  $t_R$  = 27.54 min (minor), 38.92 min (major).

**(R)-phenyl -2-(p-tolyl) butanoate (2e):**

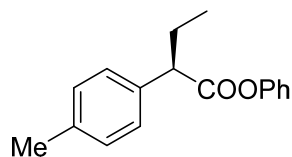

Yield: 91%; ee: 91%.

Colorless oil,  $[\alpha]_D^{20}$  = -74° (0.39, CHCl<sub>3</sub>).

**<sup>1</sup>H NMR (400 MHz, CDCl<sub>3</sub>):**  $\delta$  7.34 – 7.27 (m, 4H), 7.20 – 7.16 (m, 3H), 7.00 – 6.97 (m, 2H), 3.66 (t,  $J$  = 7.7 Hz, 1H), 2.35 (s, 3H), 2.26 – 2.15 (m, 1H), 1.93 – 1.83 (m, 1H), 0.99 (t,  $J$  = 7.4 Hz, 3H).

**<sup>13</sup>C NMR (100 MHz, CDCl<sub>3</sub>):**  $\delta$  172.8, 151.0, 137.2, 135.7, 129.5, 129.4, 128.0, 125.8, 121.6, 53.2, 26.9, 21.2, 12.3.

**HRMS-ESI (m/z)** Calcd for C<sub>17</sub>H<sub>19</sub>O<sub>2</sub> [(M + H)<sup>+</sup>] 255.1380, Found: 255.1388.

**IR (KBr):**  $\nu$  (cm<sup>-1</sup>) 3450, 2964, 1754, 1646, 1513, 1491, 749, 687.

**HPLC:** Chiralcel OJ-H (25 cm × 0.46 cm), hexane/2-propanol = 90/10, 1.0 mL/min, 204 nm, 25 °C,  $t_R$  = 15.59 min (major), 18.64 min (minor).

**(R)-phenyl -2-(m-tolyl) butanoate (2f):**

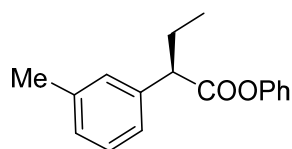

Yield: 91%; ee: 90%.

Colorless oil,  $[\alpha]_D^{20}$  = -65° (0.24, CHCl<sub>3</sub>).

**<sup>1</sup>H NMR (400 MHz, CDCl<sub>3</sub>):**  $\delta$  7.35 – 7.31 (m, 2H), 7.27 – 7.23 (m, 1H), 7.20 – 7.16 (m, 3H), 7.10 (d,  $J$  = 7.2 Hz, 1H), 7.00 – 6.98 (m, 2H), 3.65 (t,  $J$  = 7.7 Hz, 1H), 2.36 (s, 3H), 2.26 – 2.16 (m, 1H), 1.94 – 1.83 (m, 1H), 0.99 (t,  $J$  = 7.4 Hz, 3H).

**<sup>13</sup>C NMR (100 MHz, CDCl<sub>3</sub>):**  $\delta$  172.8, 150.9, 138.7, 138.5, 129.4, 128.9, 128.7, 128.3, 125.8, 125.1, 121.6, 53.6, 26.9, 21.6, 12.3.

**HRMS-ESI (m/z)** Calcd for C<sub>17</sub>H<sub>19</sub>O<sub>2</sub> [(M + H)<sup>+</sup>] 255.1380, Found: 255.1385.

**IR (KBr):**  $\nu$  (cm<sup>-1</sup>) 3451, 2965, 1755, 1630, 1592, 1491, 767, 749.

**HPLC:** Chiralcel OJ-H (25 cm × 0.46 cm), hexane/2-propanol = 90/10, 1.0 mL/min, 204 nm, 25 °C,  $t_R$  = 12.10 min (minor), 13.76 min (major).

**(R)-ethyl-2-(o-tolyl) butanoate (2g):**

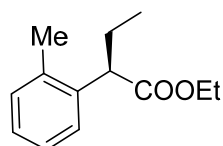

Yield: 90%; ee: 89%.

Colorless oil,  $[\alpha]_D^{20}$  = -60° (0.13, CHCl<sub>3</sub>).

**<sup>1</sup>H NMR (400 MHz, CDCl<sub>3</sub>):**  $\delta$  7.32 (d,  $J$  = 7.2 Hz, 1H), 7.19 – 7.13 (m, 3H), 4.16 – 4.05 (m, 2H), 3.73 (t,  $J$  = 8 Hz, 1H), 2.38 (s, 3H), 2.17 – 2.06 (m, 1H), 1.81 – 1.70 (m, 1H), 1.20 (t,  $J$  = 7.1 Hz, 3H), 0.91 (t,  $J$  = 7.4 Hz, 3H).

**<sup>13</sup>C NMR (100 MHz, CDCl<sub>3</sub>):** δ 174.4, 137.9, 136.3, 130.5, 126.9, 126.8, 126.4, 60.7, 48.8, 26.4, 20.0, 14.3, 12.4.

**HRMS-ESI (m/z)** Calcd for C<sub>13</sub>H<sub>19</sub>O<sub>2</sub> [(M + H)<sup>+</sup>] 207.1380, Found: 207.1383.

**IR (KBr):** ν (cm<sup>-1</sup>) 3415, 2965, 1733, 1636, 1490, 1463, 750, 732.

**HPLC:** Chiralcel OJ-H (25 cm × 0.46 cm), hexane/2-propanol = 99.8/0.2, 0.6 mL/min, 204 nm, 25 °C, t<sub>R</sub> = 11.24 min (major), 12.21 min (minor).

**(R)-phenyl-2-(4-bromophenyl) butanoate (2h):**

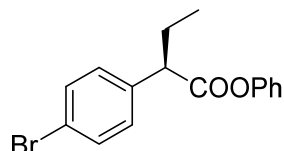

Yield: 99%; ee: 86%.

Colorless oil, [α]<sub>D</sub><sup>20</sup> = -64° (0.18, CHCl<sub>3</sub>).

**<sup>1</sup>H NMR (400 MHz, CDCl<sub>3</sub>):** 7.50 – 7.47 (m, 2H), 7.36 – 7.32 (m, 2H), 7.29 – 7.27 (m, 2H), 7.22 – 7.18 (m, 1H), 6.99 – 6.97 (m, 2H), 3.66 (t, *J* = 7.7 Hz, 1H), 2.26 – 2.15 (m, 1H), 1.93 – 1.82 (m, 1H), 0.99 (t, *J* = 7.4 Hz, 3H).

**<sup>13</sup>C NMR (100 MHz, CDCl<sub>3</sub>):** δ 172.2, 150.7, 137.7, 132.0, 129.9, 129.5, 126.0, 121.5, 121.5, 53.0, 26.8, 12.2.

**HRMS-ESI (m/z)** Calcd for C<sub>16</sub>H<sub>16</sub>BrO<sub>2</sub> [(M + H)<sup>+</sup>] 319.0328, Found: 319.0337.

**IR (KBr):** ν (cm<sup>-1</sup>) 3461, 2965, 1754, 1592, 1489, 1456, 815, 749.

**HPLC:** Chiralcel OJ-H (25 cm × 0.46 cm), hexane/2-propanol = 95/5, 1.0 mL/min, 204 nm, 25 °C, t<sub>R</sub> = 16.46 min (minor), 23.39 min (major).

**(R)-phenyl-2-(4-iodophenyl) butanoate (2i):**

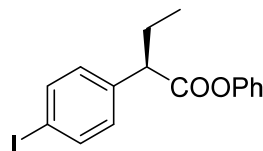

Yield: 94%; ee: 85%.

Colorless oil, [α]<sub>D</sub><sup>20</sup> = -59° (0.13, CHCl<sub>3</sub>).

**<sup>1</sup>H NMR (400 MHz, CDCl<sub>3</sub>):** δ 7.71 – 7.68 (m, 2H), 7.36 – 7.32 (m, 2H), 7.22 – 7.18 (t, *J* = 7.7 Hz, 1H), 7.17 – 7.14 (m, 2H), 6.98 (d, *J* = 7.7 Hz, 2H), 3.64 (t, *J* = 7.7 Hz, 1H), 2.26 – 2.15 (m, 1H), 1.93 – 1.82 (m, 1H), 0.99 (t, *J* = 7.4 Hz, 3H).

**<sup>13</sup>C NMR (100 MHz, CDCl<sub>3</sub>):** δ 172.2, 150.8, 138.4, 137.9, 130.2, 129.5, 126.0, 121.5, 93.1, 53.1, 26.8, 12.2.

**HRMS-ESI (m/z)** Calcd for C<sub>16</sub>H<sub>16</sub>IO<sub>2</sub> [(M + H)<sup>+</sup>] 367.0189, Found: 367.0195.

**IR (KBr):** ν (cm<sup>-1</sup>) 3477, 2964, 1755, 1638, 1592, 1485, 814, 750.

**HPLC:** Chiralcel OJ-H (25 cm × 0.46 cm), hexane/2-propanol = 95/5, 1.0 mL/min, 204 nm, 25 °C, t<sub>R</sub> = 17.77 min (minor), 31.39 min (major).

**(R)-methyl-4-(1-(benzyloxy)-1-oxobutan-2-yl)benzoate (2j):**

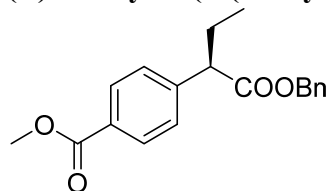

Yield: 97%; ee: 84%.

Colorless oil,  $[\alpha]_{\text{D}}^{20} = -6^{\circ}$  (0.21,  $\text{CHCl}_3$ ).

**$^1\text{H}$  NMR (400 MHz,  $\text{CDCl}_3$ ):**  $\delta$  7.98 (d,  $J = 8.2$  Hz, 2H), 7.38 (d,  $J = 8.2$  Hz, 2H), 7.34 – 7.28 (m, 3H), 7.24 (m, 2H), 5.26 – 4.97 (m, 2H), 3.91 (s, 3H), 3.57 (t,  $J = 7.7$  Hz, 1H), 2.19 – 2.08 (m, 1H), 1.88 – 1.77 (m, 1H), 0.88 (t,  $J = 7.3$  Hz, 3H).

**$^{13}\text{C}$  NMR (100 MHz,  $\text{CDCl}_3$ ):**  $\delta$  173.2, 166.9, 144.0, 135.7, 129.8, 129.1, 128.5, 128.2, 128.1, 128.0, 66.6, 53.4, 52.1, 26.6, 12.0.

**HRMS-ESI (m/z)** Calcd for  $\text{C}_{19}\text{H}_{20}\text{O}_4$   $[(\text{M} + \text{H})^+]$  313.1434, Found: 313.1437.

**IR (KBr):**  $\nu$  ( $\text{cm}^{-1}$ ) 2966, 2406, 1725, 1559, 1281, 1162, 921, 746.

**HPLC:** Chiralcel OJ-H (25 cm  $\times$  0.46 cm), hexane/2-propanol = 80/20, 1.0 mL/min, 254 nm, 25  $^{\circ}\text{C}$ ,  $t_{\text{R}} = 12.56$  min (minor), 17.99 min (major).

### **(R)-benzyl 2-(4-(trifluoromethyl)phenyl)butanoate (2k)**

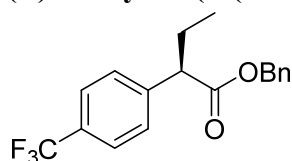

Yield: 99%; ee: 78%.

Colorless oil,  $[\alpha]_{\text{D}}^{20} = -4^{\circ}$  (0.11,  $\text{CHCl}_3$ ).

**$^1\text{H}$  NMR (400 MHz,  $\text{CDCl}_3$ ):**  $\delta$  7.57 (d,  $J = 8.2$  Hz, 2H), 7.42 (d,  $J = 8.1$  Hz, 2H), 7.36 – 7.29 (m, 3H), 7.26 – 7.22 (m, 2H), 5.46 – 4.85 (m, 2H), 3.57 (t,  $J = 7.7$  Hz, 1H), 2.20 – 2.09 (m, 1H), 1.88 – 1.77 (m, 1H), 0.89 (t,  $J = 7.3$  Hz, 3H).

**$^{13}\text{C}$  NMR (100 MHz,  $\text{CDCl}_3$ ):**  $\delta$  173.1, 142.8, 135.7, 129.5 (q,  $J = 32.8$ ), 128.5, 128.4, 128.2, 128.0, 125.5, 125.5, 122.8, 66.6, 53.2, 26.6, 12.0.

**HRMS-ESI (m/z)** Calcd for  $\text{C}_{18}\text{H}_{17}\text{F}_3\text{O}_2$   $[(\text{M} + \text{Na})^+]$  345.1073, Found: 345.1083.

**IR (KBr):**  $\nu$  ( $\text{cm}^{-1}$ ) 3662, 2966, 2235, 1736, 1261, 1123, 801, 751.

**HPLC:** Chiralcel OJ-H (25 cm  $\times$  0.46 cm), hexane/2-propanol = 98/2, 1.0 mL/min, 210 nm, 25  $^{\circ}\text{C}$ ,  $t_{\text{R}} = 9.08$  min (minor), 11.53 min (major).

### **(R)-phenyl 2-([1,1'-biphenyl]-4-yl) butanoate (2l):**

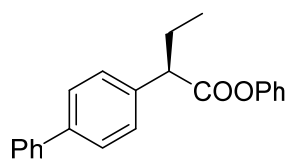

Yield: 98%; ee: 90%.

Colorless oil,  $[\alpha]_{\text{D}}^{20} = -69^{\circ}$  (0.44,  $\text{CHCl}_3$ ).

**$^1\text{H}$  NMR (400 MHz,  $\text{CDCl}_3$ ):**  $\delta$  7.61 – 7.58 (m, 4H), 7.49 – 7.42 (m, 4H), 7.36 – 7.32 (m, 3H), 7.21 – 7.17 (m, 1H), 7.02 – 7.00 (m, 2H), 3.74 (t,  $J = 7.7$  Hz, 1H), 2.32 – 2.21 (m, 1H), 2.00 – 1.89 (m, 1H), 1.03 (t,  $J = 7.4$  Hz, 3H).

**$^{13}\text{C}$  NMR (100 MHz,  $\text{CDCl}_3$ ):**  $\delta$  172.7, 150.9, 140.8, 140.5, 137.8, 129.5, 128.9, 128.6, 127.6, 127.5, 127.2, 125.9, 121.6, 53.3, 26.9, 12.3.

**HRMS-ESI (m/z)** Calcd for  $\text{C}_{22}\text{H}_{21}\text{O}_2$   $[(\text{M} + \text{H})^+]$  317.1536, Found: 317.1539.

**IR (KBr):**  $\nu$  ( $\text{cm}^{-1}$ ) 3476, 2965, 1753, 1619, 1592, 1486, 816, 748.

**HPLC:** Chiralcel OJ-H (25 cm  $\times$  0.46 cm), hexane/2-propanol = 85/15, 1.0 mL/min, 204 nm, 35  $^{\circ}\text{C}$ ,  $t_{\text{R}} = 19.86$  min (minor), 23.97 min (major).

### **(R)-phenyl 2-(naphthalen-2-yl) butanoate (2m):**

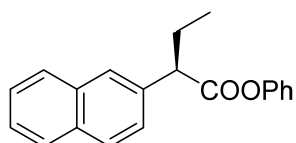

Yield: 99%; ee: 91%.

Colorless oil,  $[\alpha]_{\text{D}}^{20} = -91^{\circ}$  (0.26,  $\text{CHCl}_3$ ).

**$^1\text{H}$  NMR (400 MHz,  $\text{CDCl}_3$ ):**  $\delta$  7.87 – 7.83 (m, 4H), 7.56 – 7.47 (m, 3H), 7.34 – 7.30 (m, 2H), 7.20 – 7.16 (m, 1H), 6.99 – 6.97 (m, 2H), 3.87 (t,  $J = 7.7$  Hz, 1H), 2.38 – 2.27 (m, 1H), 2.07 – 1.96 (m, 1H), 1.03 (t,  $J = 7.4$  Hz, 3H).

**$^{13}\text{C}$  NMR (100 MHz,  $\text{CDCl}_3$ ):**  $\delta$  172.7, 150.9, 136.1, 133.6, 132.8, 129.4, 128.6, 128.0, 127.8, 127.2, 126.3, 126.0, 126.0, 125.9, 121.5, 53.7, 26.8, 12.3.

**HRMS-ESI (m/z)** Calcd for  $\text{C}_{20}\text{H}_{19}\text{O}_2$  [(M + H)<sup>+</sup>] 291.1380, Found: 291.1386.

**IR (KBr):**  $\nu$  ( $\text{cm}^{-1}$ ) 3472, 2965, 1752, 1630, 1592, 1491, 764, 749.

**HPLC:** Chiralcel OJ-H (25 cm  $\times$  0.46 cm), hexane/2-propanol = 85/15, 1.0 mL/min, 204 nm, 25  $^{\circ}\text{C}$ ,  $t_{\text{R}} = 20.06$  min (minor), 25.87 min (major).

**(R)-phenyl-2-(thiophen-2-yl) butanoate (2n):**

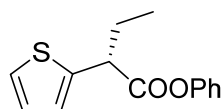

Yield: 99%; ee: 88%.

Colorless oil,  $[\alpha]_{\text{D}}^{20} = -26^{\circ}$  (0.29,  $\text{CHCl}_3$ ).

**$^1\text{H}$  NMR (400 MHz,  $\text{CDCl}_3$ ):**  $\delta$  7.37 – 7.33 (m, 2H), 7.25 – 7.19 (m, 2H), 7.05 – 7.03 (m, 3H), 7.00 – 6.98 (m, 1H), 4.01 (t,  $J = 7.6$  Hz, 1H), 2.30 – 2.20 (m, 1H), 2.05 – 1.94 (m, 1H), 1.05 (t,  $J = 7.4$  Hz, 3H).

**$^{13}\text{C}$  NMR (100 MHz,  $\text{CDCl}_3$ ):**  $\delta$  171.7, 150.8, 140.9, 129.5, 126.9, 126.0, 125.8, 124.9, 121.5, 48.8, 28.1, 12.2.

**HRMS-ESI (m/z)** Calcd for  $\text{C}_{14}\text{H}_{15}\text{SO}_2$  [(M + H)<sup>+</sup>] 247.0787, Found: 247.0788.

**IR (KBr):**  $\nu$  ( $\text{cm}^{-1}$ ) 3414, 2931, 1757, 1592, 1491, 1456, 750, 700.

**HPLC:** Chiralcel OJ-H (25 cm  $\times$  0.46 cm), hexane/2-propanol = 85/15, 1.0 mL/min, 204 nm, 25  $^{\circ}\text{C}$ ,  $t_{\text{R}} = 21.53$  min (major), 24.38 min (minor).

**(R)-phenyl-2-phenylpropanoate (2o):**

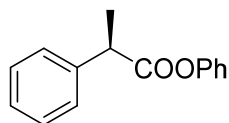

Yield: 92%; ee: 86%.

Colorless oil,  $[\alpha]_{\text{D}}^{20} = -83^{\circ}$  (0.2,  $\text{CHCl}_3$ ).

**$^1\text{H}$  NMR (400 MHz,  $\text{CDCl}_3$ ):**  $\delta$  7.42 – 7.28 (m, 7H), 7.21 – 7.17 (m, 1H), 7.00 – 6.97 (m, 2H), 3.96 (q,  $J = 7.2$  Hz, 1H), 1.62 (d,  $J = 7.2$  Hz, 3H).

**$^{13}\text{C}$  NMR (100 MHz,  $\text{CDCl}_3$ ):**  $\delta$  173.2, 150.9, 140.2, 129.4, 128.9, 127.6, 127.5, 125.9, 121.5, 45.8, 18.6.

**HRMS-ESI (m/z)** Calcd for  $\text{C}_{15}\text{H}_{15}\text{O}_2$  [(M + H)<sup>+</sup>] 227.1067, Found: 227.1078.

**IR (KBr):**  $\nu$  ( $\text{cm}^{-1}$ ) 3414, 2979, 1757, 1638, 1592, 1491, 749, 732.

**HPLC:** Chiralcel OJ-H (25 cm  $\times$  0.46 cm), hexane/2-propanol = 90/10, 1.0 mL/min, 204 nm, 25  $^{\circ}\text{C}$ ,  $t_{\text{R}} = 32.89$  min (major), 36.80 min (minor).



**(R)-phenyl-2-phenylpentanoate (2p):**

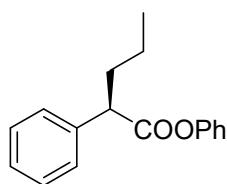

Yield: 91%; ee: 92%.

Colorless oil,  $[\alpha]_{\text{D}}^{20} = -60^{\circ}$  (0.13,  $\text{CHCl}_3$ ).

**$^1\text{H NMR}$  (400 MHz,  $\text{CDCl}_3$ ):**  $\delta$  7.42 – 7.27 (m, 7H), 7.21 – 7.17 (m, 1H), 7.00 – 6.97 (m, 2H), 3.80 (t,  $J = 7.7$  Hz, 1H), 2.20 – 2.13 (m, 1H), 1.89 – 1.81 (m, 1H), 1.39 (ddd,  $J = 14.2, 9.3, 7.6$  Hz, 2H), 0.97 (t,  $J = 7.4$  Hz, 3H).

**$^{13}\text{C NMR}$  (100 MHz,  $\text{CDCl}_3$ ):**  $\delta$  172.8, 150.9, 138.9, 129.4, 128.8, 128.1, 127.5, 125.9, 121.5, 51.7, 35.7, 20.9, 14.0.

**HRMS-ESI** ( $m/z$ ) Calcd for  $\text{C}_{17}\text{H}_{19}\text{O}_2$   $[(\text{M} + \text{H})^+]$  255.1380, Found: 255.1387.

**IR (KBr):**  $\nu$  ( $\text{cm}^{-1}$ ) 3415, 2929, 1755, 1618, 1592, 1491, 750, 697.

**HPLC:** Chiralcel OJ-H (25 cm  $\times$  0.46 cm), hexane/2-propanol = 90/10, 1.0 mL/min, 204 nm, 25  $^{\circ}\text{C}$ ,  $t_{\text{R}} = 12.84$  min (minor), 15.07 min (major).

**(R)-phenyl-5-bromo-2-phenylpentanoate (2q):**

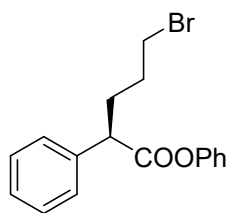

Yield: 91%; ee: 91%.

Colorless oil,  $[\alpha]_{\text{D}}^{20} = -46^{\circ}$  (0.14,  $\text{CHCl}_3$ ).

**$^1\text{H NMR}$  (400 MHz,  $\text{CDCl}_3$ ):**  $\delta$  7.41 – 7.25 (m, 7H), 7.22 – 7.18 (m, 1H), 6.99 – 6.96 (m, 2H), 3.81 (td,  $J = 7.7, 1.8$  Hz, 1H), 3.43 (t,  $J = 6.5$  Hz, 2H), 2.36 – 2.30 (m, 1H), 2.09 – 1.97 (m, 1H), 1.96 – 1.81 (m, 2H).

**$^{13}\text{C NMR}$  (100 MHz,  $\text{CDCl}_3$ ):**  $\delta$  172.2, 150.8, 138.1, 129.5, 129.1, 128.1, 127.8, 126.0, 121.5, 51.1, 33.1, 32.0, 30.7.

**HRMS-ESI** ( $m/z$ ) Calcd for  $\text{C}_{16}\text{H}_{16}\text{BrO}_2$   $[(\text{M} + \text{H})^+]$  333.0485, Found: 333.0488.

**IR (KBr):**  $\nu$  ( $\text{cm}^{-1}$ ) 3451, 2921, 1752, 1630, 1491, 1454, 764, 749.

**HPLC:** Chiralcel OJ-H (25 cm  $\times$  0.46 cm), hexane/2-propanol = 85/15, 1.0 mL/min, 204 nm, 25  $^{\circ}\text{C}$ ,  $t_{\text{R}} = 29.49$  min (minor), 42.53 min (major).

**(R)-phenyl-5-azido-2-phenylpentanoate (2r):**

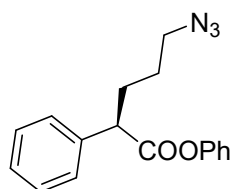

Yield: 99%; ee: 90%.

Colorless oil,  $[\alpha]_{\text{D}}^{20} = -75^{\circ}$  (0.15,  $\text{CHCl}_3$ ).

**<sup>1</sup>H NMR (400 MHz, CDCl<sub>3</sub>):** δ 7.41 – 7.30 (m, 7H), 7.20 (t, *J* = 7.4 Hz, 1H), 6.98 (dd, *J* = 8.5, 0.9 Hz, 2H), 3.80 (t, *J* = 7.7 Hz, 1H), 3.34 – 3.30 (m, 2H), 2.27 – 2.23 (m, 1H), 1.99 – 1.96 (m, 1H), 1.69 – 1.60 (m, 2H).

**<sup>13</sup>C NMR (100 MHz, CDCl<sub>3</sub>):** δ 172.3, 150.7, 138.1, 129.5, 129.1, 128.0, 127.8, 126.0, 121.4, 51.4, 51.2, 30.6, 27.0.

**HRMS-ESI (m/z)** Calcd for C<sub>17</sub>H<sub>17</sub>N<sub>3</sub>O<sub>2</sub> [(M + H)<sup>+</sup>] 296.1394, Found: 296.1398.

**IR (KBr):** ν (cm<sup>-1</sup>) 2961, 2096, 1754, 1592, 1491, 1452, 729, 689.

**HPLC:** Chiralcel OJ-H (25 cm × 0.46 cm), hexane/2-propanol = 70/30, 1.0 mL/min, 204 nm, 35 °C, t<sub>R</sub> = 14.00 min (minor), 21.90 min (major).

**(*R*)-phenyl-2-phenylpent-4-enoate (2s):**

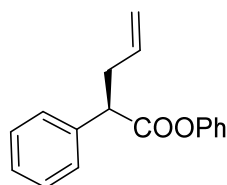

Yield: 99%; ee: 90%.

Colorless oil, [α]<sub>D</sub><sup>20</sup> = -54° (0.13, CHCl<sub>3</sub>).

**<sup>1</sup>H NMR (400 MHz, CDCl<sub>3</sub>):** δ 7.42 – 7.28 (m, 7H), 7.18 (t, *J* = 7.4 Hz, 1H), 6.98 (d, *J* = 8.1 Hz, 2H), 5.86 – 5.78 (m, 1H), 5.12 (dd, *J* = 33.8, 13.6 Hz, 2H), 3.96 – 3.79 (m, 1H), 2.98 – 2.91 (m, 1H), 2.65 – 2.58 (m, 1H).

**<sup>13</sup>C NMR (100 MHz, CDCl<sub>3</sub>):** δ 172.1, 150.9, 138.2, 135.1, 129.5, 128.9, 128.1, 127.7, 126.0, 121.5, 117.5, 51.6, 37.7.

**HRMS-ESI (m/z)** Calcd for C<sub>17</sub>H<sub>17</sub>O<sub>2</sub> [(M + H)<sup>+</sup>] 253.1223, Found: 253.1229.

**IR (KBr):** ν (cm<sup>-1</sup>) 3472, 3078, 2921, 1756, 1644, 1592, 1491, 749.

**HPLC:** Chiralcel OJ-H (25 cm × 0.46 cm), hexane/2-propanol = 95/5, 1.0 mL/min, 204 nm, 25 °C, t<sub>R</sub> = 17.61 min (major), 18.72 min (minor).

**(*R*)-phenyl-2-(4-isobutylphenyl) propanoate (2t):**

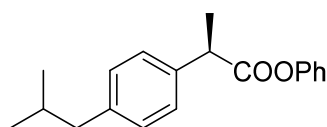

Yield: 92%; ee: 86%.

Colorless oil, [α]<sub>D</sub><sup>20</sup> = -67° (0.22, CHCl<sub>3</sub>).

**<sup>1</sup>H NMR (400 MHz, CDCl<sub>3</sub>):** δ 7.34 – 7.29 (m, 4H), 7.20 – 7.13 (m, 3H), 7.00 – 6.98 (m, 2H), 3.93 (q, *J* = 7.1 Hz, 1H), 2.47 (d, *J* = 7.2 Hz, 2H), 1.91 – 1.81 (m, 1H), 1.60 (d, *J* = 7.1 Hz, 3H), 0.91 (d, *J* = 6.6 Hz, 6H).

**<sup>13</sup>C NMR (100 MHz, CDCl<sub>3</sub>):** δ 173.4, 151.0, 140.9, 137.4, 129.6, 129.4, 127.3, 125.8, 121.5, 45.4, 45.2, 30.3, 22.5, 18.7.

**HRMS-ESI (m/z)** Calcd for C<sub>19</sub>H<sub>23</sub>O<sub>2</sub> [(M + H)<sup>+</sup>] 283.1693, Found: 283.1701.

**HPLC:** Chiralcel OJ-H (25 cm × 0.46 cm), hexane/2-propanol = 99/1, 1.0 mL/min, 210 nm, 25 °C, t<sub>R</sub> = 23.03 min (major), 35.55 min (minor).

**(*R*)-phenyl-2-(4-isobutylphenyl) butanoate (2u):**

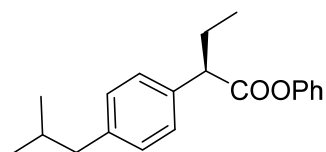

Yield: 99%; ee: 90%.

Colorless oil,  $[\alpha]_{\text{D}}^{20} = -44^{\circ}$  (0.11,  $\text{CHCl}_3$ ).

**$^1\text{H NMR}$  (400 MHz,  $\text{CDCl}_3$ ):**  $\delta$  7.35 – 7.28 (m, 4H), 7.21 – 7.17 (m, 1H), 7.13 (d,  $J = 8.1$  Hz, 2H), 7.00 – 6.98 (m, 2H), 3.67 (t,  $J = 7.7$  Hz, 1H), 2.47 (d,  $J = 7.2$  Hz, 2H), 2.25 – 2.17 (m, 1H), 1.92 – 1.85 (m, 2H), 1.00 (t,  $J = 7.4$  Hz, 3H), 0.91 (d,  $J = 6.6$  Hz, 6H).

**$^{13}\text{C NMR}$  (100 MHz,  $\text{CDCl}_3$ ):**  $\delta$  172.9, 151.0, 141.0, 135.9, 129.5, 129.4, 127.8, 125.8, 121.6, 53.3, 45.2, 30.3, 26.9, 22.5, 12.3.

**HRMS-ESI** (m/z) Calcd for  $\text{C}_{20}\text{H}_{25}\text{O}_2$  [(M + H)<sup>+</sup>] 297.1849, Found: 297.1854.

**IR (KBr):**  $\nu$  ( $\text{cm}^{-1}$ ) 3473, 2960, 1756, 1632, 1511, 1492, 1382, 749.

**HPLC:** Chiralcel OJ-H (25 cm  $\times$  0.46 cm), hexane/2-propanol = 98/2, 1.0 mL/min, 204 nm, 25  $^{\circ}\text{C}$ ,  $t_{\text{R}} = 11.39$  min (minor), 12.77 min (major).

**(R)-phenyl 2-(3-phenoxyphenyl) propanoate (2v):**

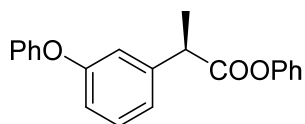

Yield: 99%; ee: 87%.

Colorless oil,  $[\alpha]_{\text{D}}^{20} = -62^{\circ}$  (0.18,  $\text{CHCl}_3$ ).

**$^1\text{H NMR}$  (400 MHz,  $\text{CDCl}_3$ ):**  $\delta$  7.36 – 7.30 (m, 5H), 7.20 (t,  $J = 7.4$  Hz, 1H), 7.14 – 7.07 (m, 3H), 7.04 – 6.92 (m, 5H), 3.93 (q,  $J = 7.1$  Hz, 1H), 1.60 (d,  $J = 7.2$  Hz, 3H).

**$^{13}\text{C NMR}$  (100 MHz,  $\text{CDCl}_3$ ):**  $\delta$  172.8, 157.7, 157.1, 150.9, 142.1, 130.2, 129.9, 129.5, 125.9, 123.5, 122.5, 121.5, 119.1, 118.2, 117.8, 45.6, 18.5.

**HRMS-ESI** (m/z) Calcd for  $\text{C}_{21}\text{H}_{19}\text{O}_3$  [(M + H)<sup>+</sup>] 319.1329, Found: 319.1332.

**IR (KBr):**  $\nu$  ( $\text{cm}^{-1}$ ) 3473, 2963, 1757, 1583, 1487, 1260, 764, 750.

**HPLC:** Chiralcel OJ-H (25 cm  $\times$  0.46 cm), hexane/2-propanol = 80/20, 1.0 mL/min, 204 nm, 25  $^{\circ}\text{C}$ ,  $t_{\text{R}} = 32.36$  min (major), 38.65 min (minor).

**phenyl 2-methyl-3-phenylpropanoate (2w)**

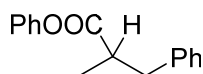

Yield: 30%; ee: 8%.

**$^1\text{H NMR}$  (400 MHz,  $\text{CDCl}_3$ )**  $\delta$  7.33 (dd,  $J = 15.0, 7.1$  Hz, 4H), 7.24 (dd,  $J = 7.6, 6.1$  Hz, 3H), 7.19 (t,  $J = 7.4$  Hz, 1H), 6.92 (d,  $J = 7.8$  Hz, 2H), 3.13 (dd,  $J = 13.3, 7.6$  Hz, 1H), 3.05 – 2.94 (m, 1H), 2.83 (dd,  $J = 13.3, 7.2$  Hz, 1H), 1.32 (d,  $J = 6.9$  Hz, 3H).

**$^{13}\text{C NMR}$  (100 MHz,  $\text{CDCl}_3$ )**  $\delta$  174.7, 150.8, 139.1, 129.5, 129.2, 128.6, 126.6, 125.8, 121.6, 41.8, 39.9, 17.1.

**HRMS-ESI** (m/z) calcd for  $\text{C}_{16}\text{H}_{16}\text{O}_2\text{Na}$  [(M + Na)<sup>+</sup>] 263.1043, found 263.1053.

**HPLC:** Chiralcel OD-H (25 cm  $\times$  0.46 cm), hexane/2-propanol = 98/2, 1.0 mL/min, 204 nm, 25  $^{\circ}\text{C}$ ,  $t_{\text{R}} = 21.93$  min (major), 23.12 min (minor).

**(R)-benzyl 2-phenylbutanoate (2b)<sup>3</sup>**

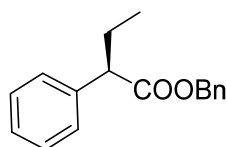

Yield: 47%; ee: 88%.

Colorless oil,  $[\alpha]_{\text{D}}^{20} = -12^{\circ}$  (0.11,  $\text{CHCl}_3$ ).

**$^1\text{H}$  NMR (400 MHz,  $\text{CDCl}_3$ ):**  $\delta$  7.31 – 7.28 (m, 7H), 7.26 – 7.23 (m, 3H), 5.10 (dd,  $J = 33.2, 12.5$  Hz, 2H), 3.51 (t,  $J = 7.7$  Hz, 1H), 2.18 – 2.07 (m, 1H), 1.87 – 1.77 (m, 1H), 0.88 (t,  $J = 7.4$  Hz, 3H).

**$^{13}\text{C}$  NMR (100 MHz,  $\text{CDCl}_3$ ):**  $\delta$  174.0, 139.0, 136.1, 128.7, 128.6, 128.2, 128.1, 128.0, 127.3, 66.4, 53.6, 26.8, 12.3.

**HPLC:** Chiralcel OD-H (25 cm  $\times$  0.46 cm), hexane/2-propanol = 98/2, 1.0 mL/min, 204 nm, 25  $^{\circ}\text{C}$ ,  $t_{\text{R}} = 22.23$  min (major), 24.90 min (minor).

#### (*R*)-ethyl-2-phenylbutanoate (2c)<sup>4</sup>

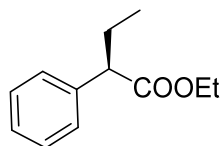

Yield: 50%; ee: 90%.

Colorless oil,  $[\alpha]_{\text{D}}^{20} = -56^{\circ}$  (0.05,  $\text{CHCl}_3$ ).

**$^1\text{H}$  NMR (400 MHz,  $\text{CDCl}_3$ ):**  $\delta$  7.35 – 7.24 (m, 5H), 4.18 – 4.06 (m, 2H), 3.43 (t,  $J = 7.7$  Hz, 1H), 2.13 – 2.06 (m, 1H), 1.83 – 1.75 (m, 1H), 1.21 (t,  $J = 7.1$  Hz, 3H), 0.89 (t,  $J = 7.4$  Hz, 3H).

**$^{13}\text{C}$  NMR (100 MHz,  $\text{CDCl}_3$ ):**  $\delta$  174.2, 139.3, 128.6, 128.0, 127.2, 60.7, 53.6, 26.9, 14.3, 12.3.

**HPLC:** Chiralcel OD-H (25 cm  $\times$  0.46 cm), hexane/2-propanol = 99.8/0.2, 1.0 mL/min, 204 nm, 25  $^{\circ}\text{C}$ ,  $t_{\text{R}} = 14.18$  min (major), 28.64 min (minor).

## 4. Synthetic Applications

### 4.1 Gram-Scale Synthesis of **2a** and (*S*)-**2v**

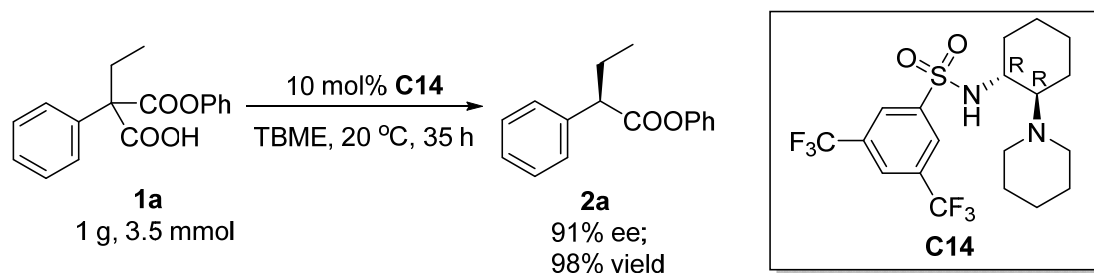

To a mixture of catalyst **C14** (10 mol%) and 2-(phenoxy-carbonyl)-2-phenylbutanoic acid **1a** (1.0 g, 3.5 mmol) in a vial were added TBME (35.0 mL), then the reaction mixture was stirred at 20 °C for 35 h. The mixture was concentrated in vacuo. The remaining residue was purified by silica gel column chromatography (hexane/ethyl acetate) to afford the desired product **2a** (828 mg, 98%) in 91% ee.

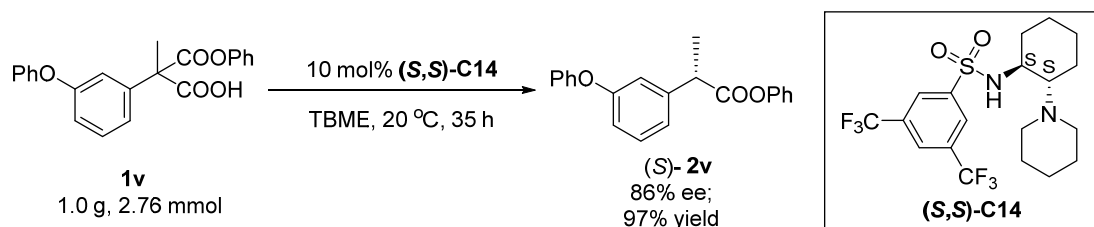

To a mixture of catalyst (*S,S*)-**C14** (10 mol%) and 2-methyl-3-oxo-3-phenoxy-2-(3-phenoxyphenyl) propanoic acid **1v** (1.0 g, 2.76 mmol) in a vial were added TBME (28.0 mL), then the reaction mixture was stirred at 20 °C for 35 h. The mixture was concentrated in vacuo, and the remaining residue was purified by silica gel column chromatography (hexane/ethyl acetate) to afford the desired product (*S*)-**2v** (878 mg, 97%) in 86% ee.

## 4.2 The Transformations of Compound **2a** and enantiomer (*S*)-**2v**

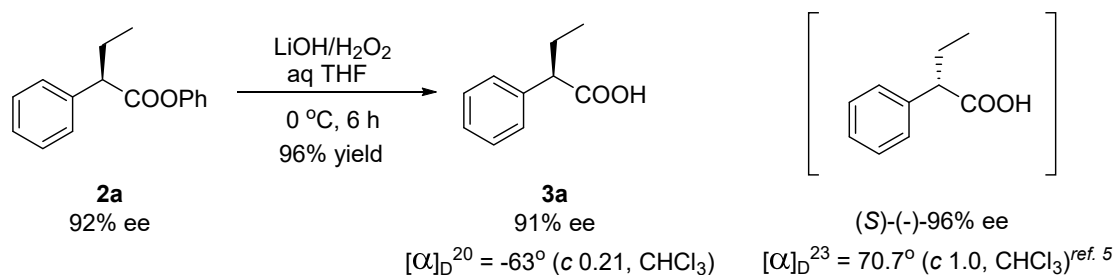

30%  $\text{H}_2\text{O}_2$  (0.48 mL) and aq.  $\text{LiOH}$  (1.22 mL, 2.0 M) were added to a solution of **2a** (0.200 g, 0.83 mmol) in THF (4.88 mL) and water (0.73 mL) at 0 °C. The reaction mixture was stirred at 0 °C for 6 h, quenched with  $\text{Na}_2\text{S}_2\text{O}_3$  (4.9 mL, 0.7 M) and  $\text{NaHCO}_3$  (9.8 mL, 0.5 M), stirred for another 15 min, acidified with 20%  $\text{HCl}$ , extracted with  $\text{EtOAc}$  (5 mL  $\times$  3), dried over  $\text{Na}_2\text{SO}_4$ , filtered, concentrated, and purified by flash chromatography (petroleum ether/ethyl acetate = 10/1) to give acid **3a** as a colorless oil (0.13 g, 96% yield, 91% ee).

### (*R*)-2-phenylbutanoic acid (*R*)-**3a**<sup>5</sup>

$[\alpha]_{\text{D}}^{20} = -63^\circ$  (*c* 0.21,  $\text{CHCl}_3$ ).

<sup>1</sup>**H NMR** (400 MHz,  $\text{CDCl}_3$ ):  $\delta$  7.35 – 7.28 (m, 5H), 3.50 – 3.45 (m, 1H), 2.15 – 2.08 (m, 1H), 1.88 – 1.80 (m, 1H), 0.96 – 0.90 (m, 3H).

<sup>13</sup>**C NMR** (100 MHz,  $\text{CDCl}_3$ ):  $\delta$  180.9, 138.5, 128.8, 128.2, 127.6, 53.5, 26.4, 12.2.

**IR** (KBr):  $\nu$  ( $\text{cm}^{-1}$ ) 3468, 2966, 1706, 1601, 1495, 1455, 748, 697.

**HPLC**: Chiralcel OJ-H (25 cm  $\times$  0.46 cm), hexane/2-propanol/ $\text{CF}_3\text{COOH}$  = 95/4/1, 1.0 mL/min, 204 nm, 25 °C,  $t_{\text{R}}$  = 16.61 min (major), 17.74 min (minor).

The optical rotation of compound **3a** was  $[\alpha]_{\text{D}}^{20} = -63^\circ$  (*c* 0.21,  $\text{CHCl}_3$ ), and the absolute configuration of **3a** was determined to be *R* by comparing the reported optical rotation of (-)-(*S*)-**3a**  $[\alpha]_{\text{D}}^{23} = 70.7$  (*c* 1.0  $\text{CHCl}_3$ ).<sup>5</sup>

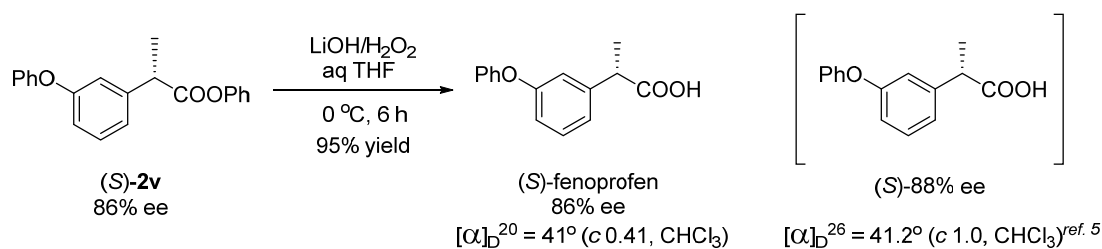

30%  $\text{H}_2\text{O}_2$  (0.36 mL) and aq.  $\text{LiOH}$  (0.93 mL, 2.0 M) were added to a solution of (*S*)-**2v** (0.200 g, 0.63 mmol) in THF (3.7 mL) and water (0.56 mL) at 0 °C. The reaction mixture was stirred at 0 °C for 6 h, quenched with  $\text{Na}_2\text{S}_2\text{O}_3$  (3.7 mL, 0.7 M) and  $\text{NaHCO}_3$  (7.4 mL, 0.5 M), stirred for another 15 min, acidified with 20%  $\text{HCl}$ , extracted with  $\text{EtOAc}$  (5 mL  $\times$  3), dried over  $\text{Na}_2\text{SO}_4$ , filtered, concentrated, and purified by flash chromatography (petroleum ether/ethyl acetate = 10/1) to give (*s*)-fenpropfen<sup>5</sup> as a colorless oil (0.14 g, 95% yield, 86% ee).

$[\alpha]_{\text{D}}^{20} = 41^\circ$  (0.41,  $\text{CHCl}_3$ ).

<sup>1</sup>**H NMR** (400 MHz,  $\text{CDCl}_3$ ):  $\delta$  7.36 – 7.25 (m, 3H), 7.13 – 7.03 (m, 2H), 7.02 – 7.01 (m, 3H), 6.89 (dd, *J* = 7.9, 2.2 Hz, 1H), 3.72 (q, *J* = 7.2 Hz, 1H), 1.50 (d, *J* = 7.2 Hz, 3H).

<sup>13</sup>**C NMR** (100 MHz,  $\text{CDCl}_3$ ):  $\delta$  180.6, 157.6, 157.0, 141.8, 130.0, 129.9, 123.5, 122.5, 119.1, 118.3, 117.6, 45.3, 18.2.

**IR (KBr):**  $\nu$  ( $\text{cm}^{-1}$ ) 3473, 2930, 1708, 1583, 1488, 1245, 752, 691.

**HPLC:** Chiralcel AD-H (25 cm  $\times$  0.46 cm), hexane/2-propanol/ $\text{CF}_3\text{COOH}$  = 90/10/0.1, 1.0 mL/min, 204 nm, 25  $^\circ\text{C}$ ,  $t_{\text{R}}$  = 24.42 min (minor), 28.20 min (major).

### 5. Some *pKa* values of our reaction related compounds

| Entry          | Compounds                                                                          | <i>pKa</i> (H <sub>2</sub> O) | <i>pKa</i> (DMSO) |
|----------------|------------------------------------------------------------------------------------|-------------------------------|-------------------|
| 1 <sup>6</sup> | 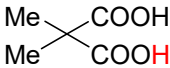  | 3.15                          | -                 |
| 2 <sup>7</sup> |   | 10.72                         | 9.07              |
| 3 <sup>8</sup> |   | 5.50                          | 11.11             |
| 4 <sup>8</sup> |  | 9.14                          | 17.96             |



## 6. Reference

- 1). (a) A. Nakano, S. Kawahara, S. Akamatsu, K. Morokuma, M. Nakatani, Y. Iwabuchi, K. Takahashi, J. Ishihara and S. Hatakeyama, *Tetrahedron* 2006, **62**, 381; (b) B. Hu and L. Deng, *Angew. Chem. Int. Ed.* 2018, **57**, 2233; (c) J. Luo, L.-W. Xu, R. A. S. Hay and Y. Lu, *Org. Lett.* 2009, **11**, 437; (d) B. Vakulya, S. Varga, A. Csámpai and T. Soós, *Org. Lett.* 2005, **7**, 1967.
- 2). M. Dajek, R. Kowalczyk and P. J. Boratyński, *Catal. Sci. Technol.*, 2018, **8**, 4358.
- 3). X.-N. Wang, H. Lv, X.-L. Huang and S. Ye, *Org. Biomol. Chem.*, 2009, **7**, 346.
- 4). B. A. Sandoval; A. J. Meichan and T. K. Hyster, *J. Am. Chem. Soc.* 2017, **139**, 11313.
- 5). C. E. Stivala and A. Zakarian, *J. Am. Chem. Soc.* 2011, **133**, 11936.
- 6). *CRC Handbook of Chemistry and Physics*, ed. W. M. Haynes, CRC Press, Boca Raton, FL, 97th edn, 2016–2017, pp. 5–91.
- 7). M. R. Crampton and I. A. Robotham, *J. Chem. Res. (S)* 1997, 22.
- 8). Corresponding p*K*<sub>a</sub> value was predicted by the approach developed by Luo and Zhang, see: Q. Yang, Y. Li, J.-D. Yang, Y. Liu, L. Zhang, S. Luo and J.-P. Cheng, *Angew. Chem. Int. Ed.* 2020, **59**, 19282.

## 7. <sup>1</sup>H NMR, <sup>13</sup>C NMR and HPLC Spectra Data

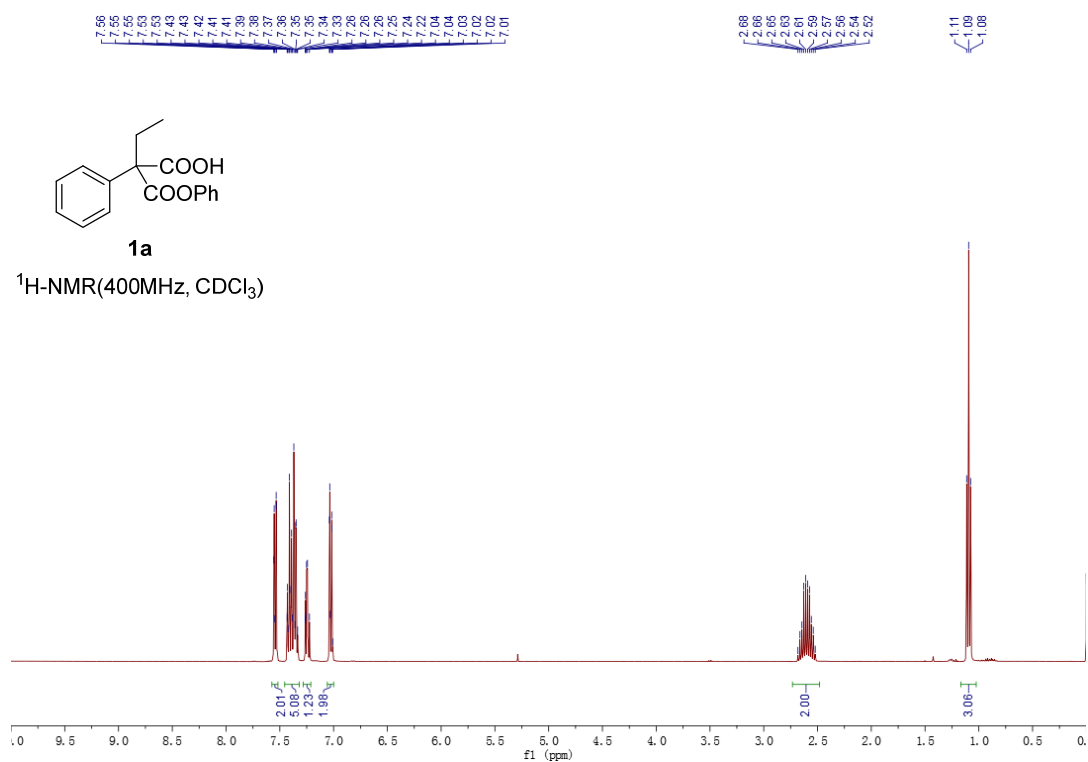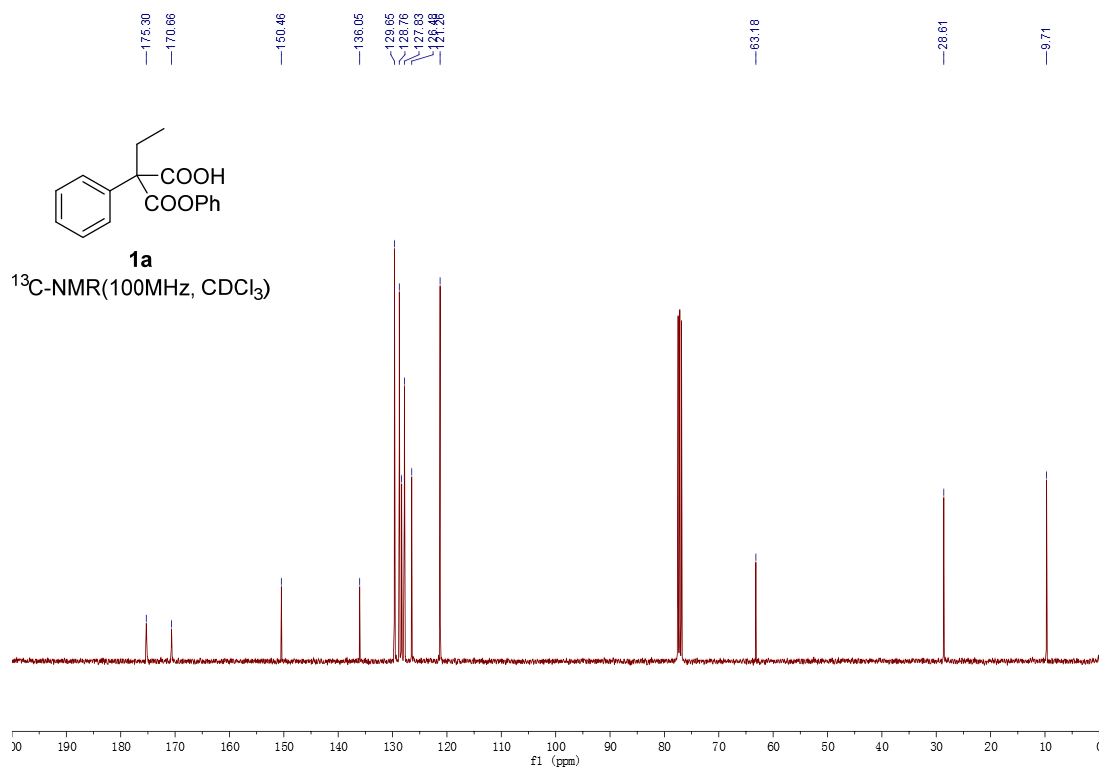

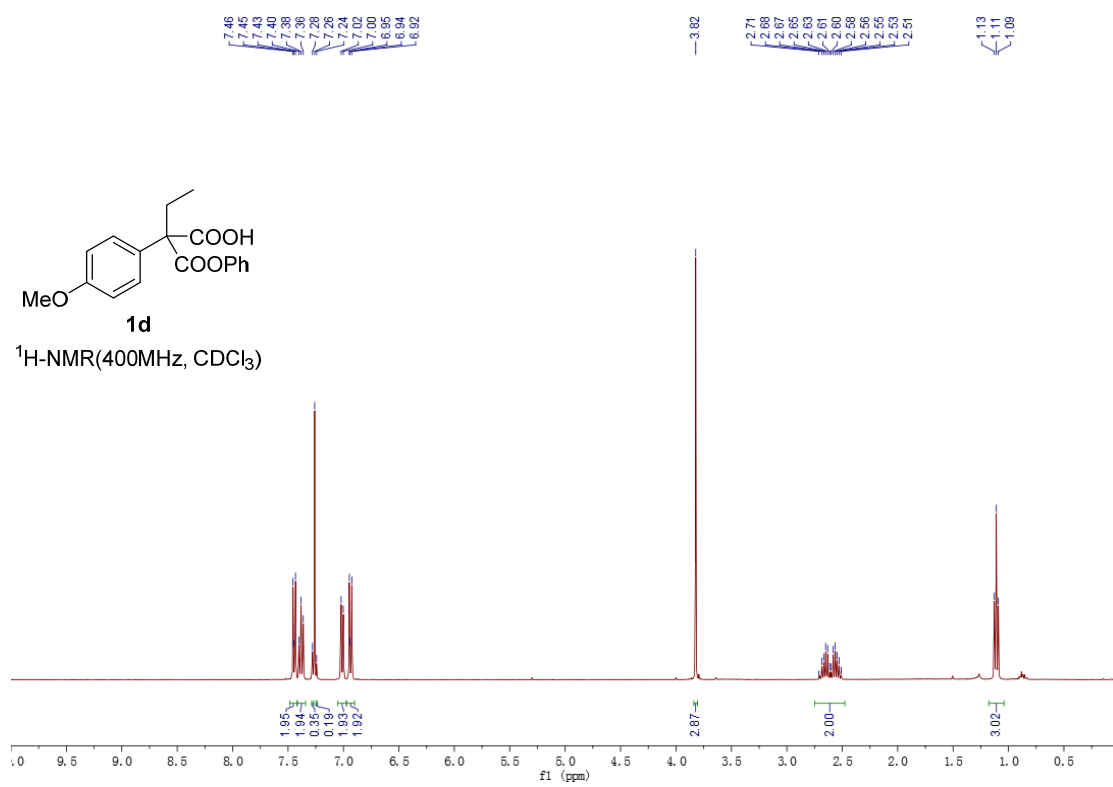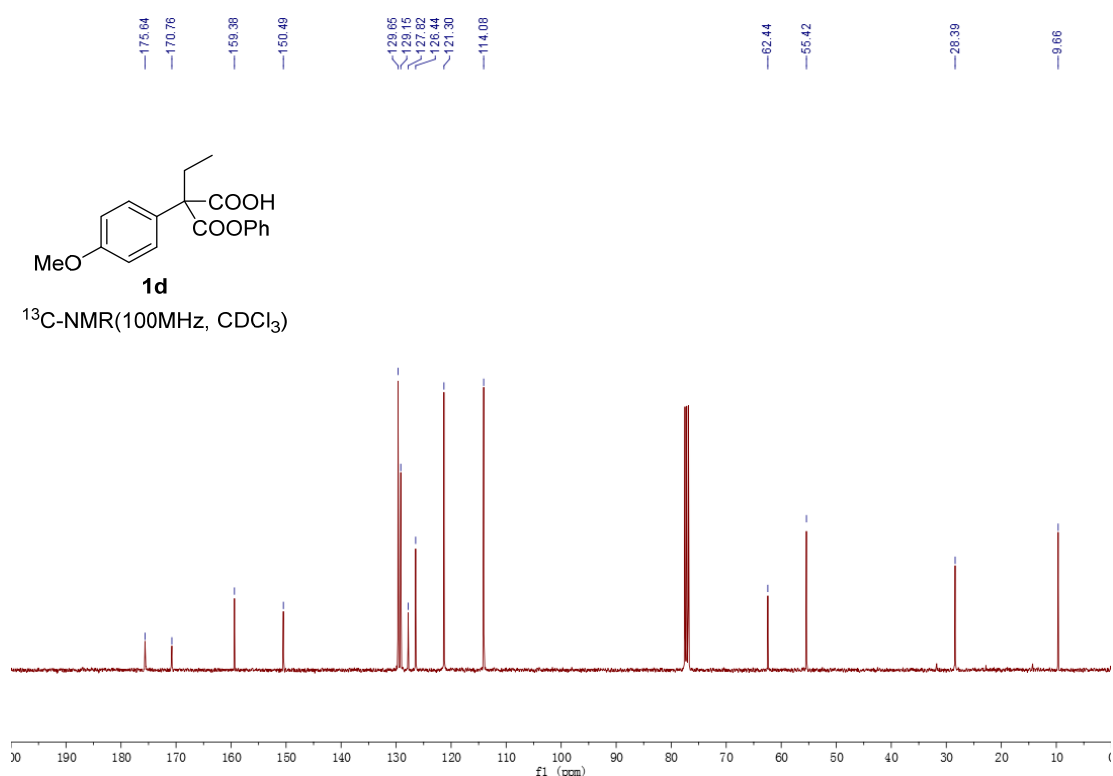

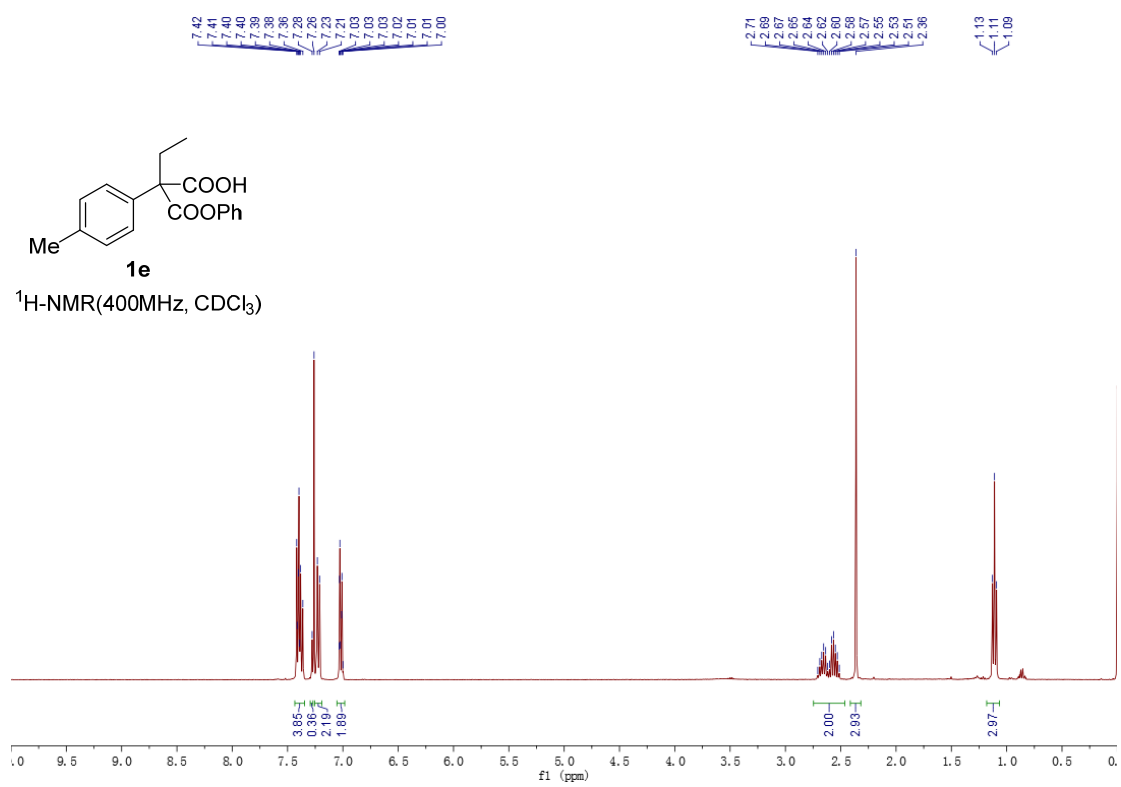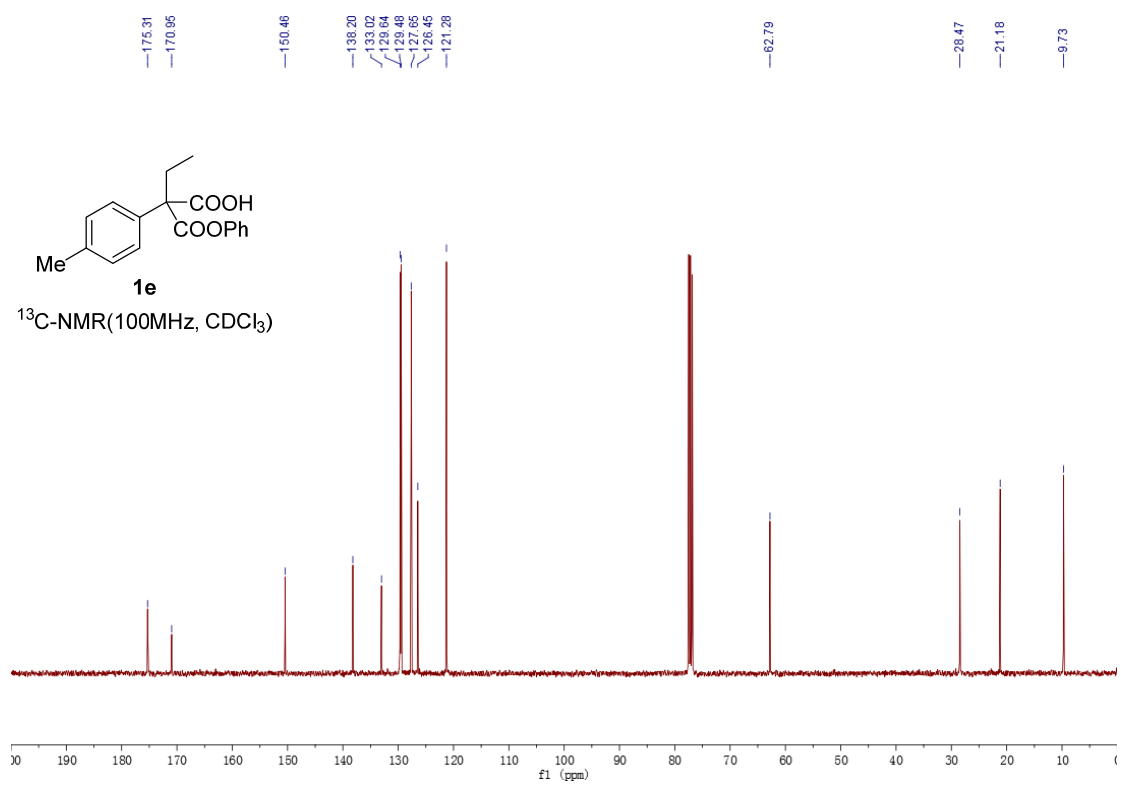

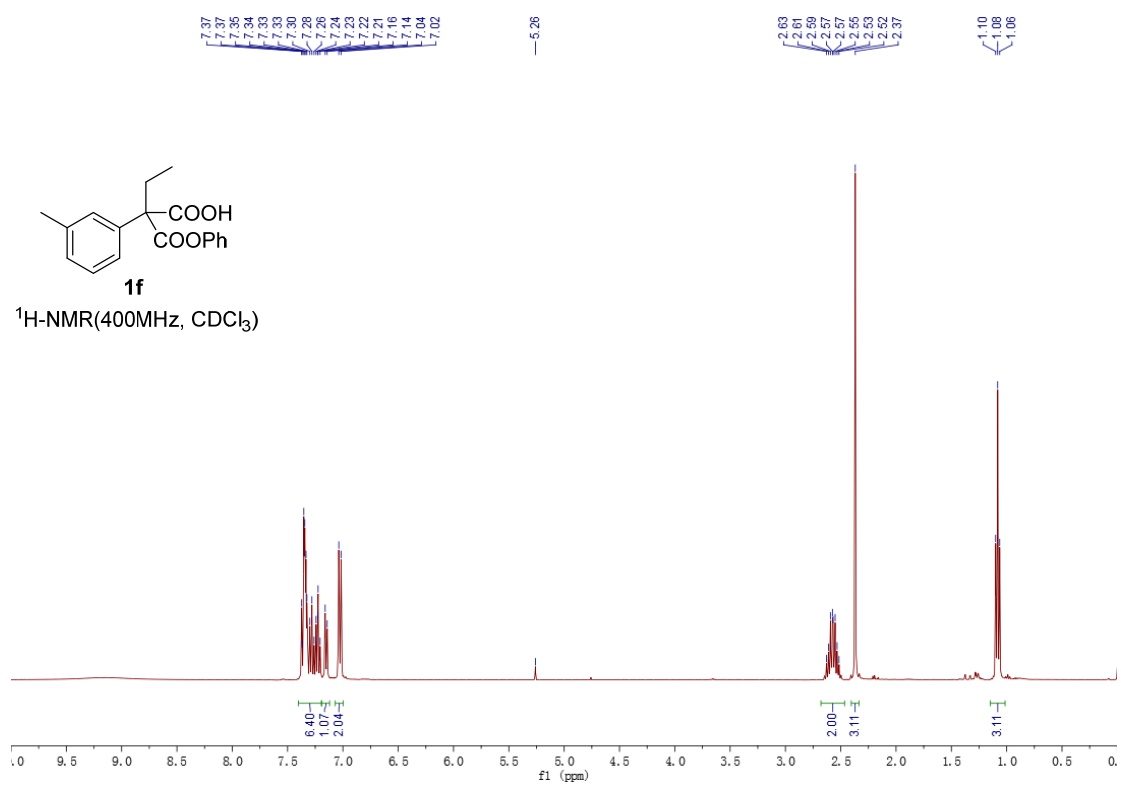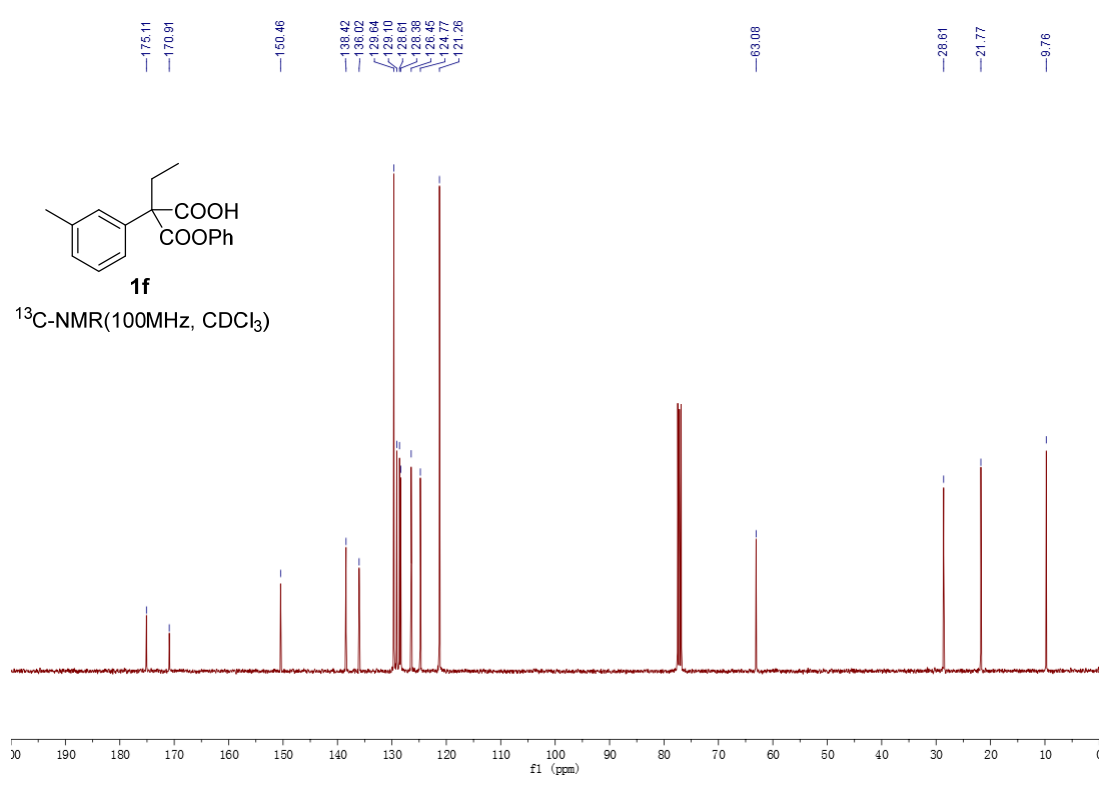

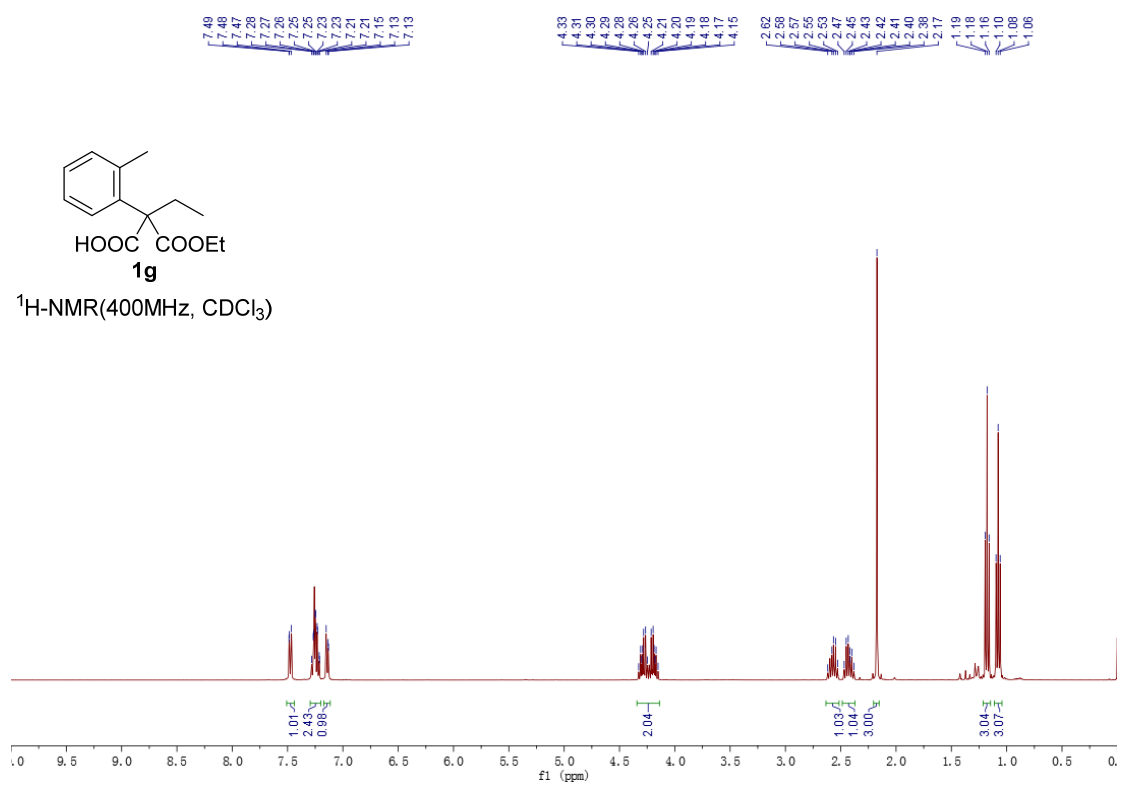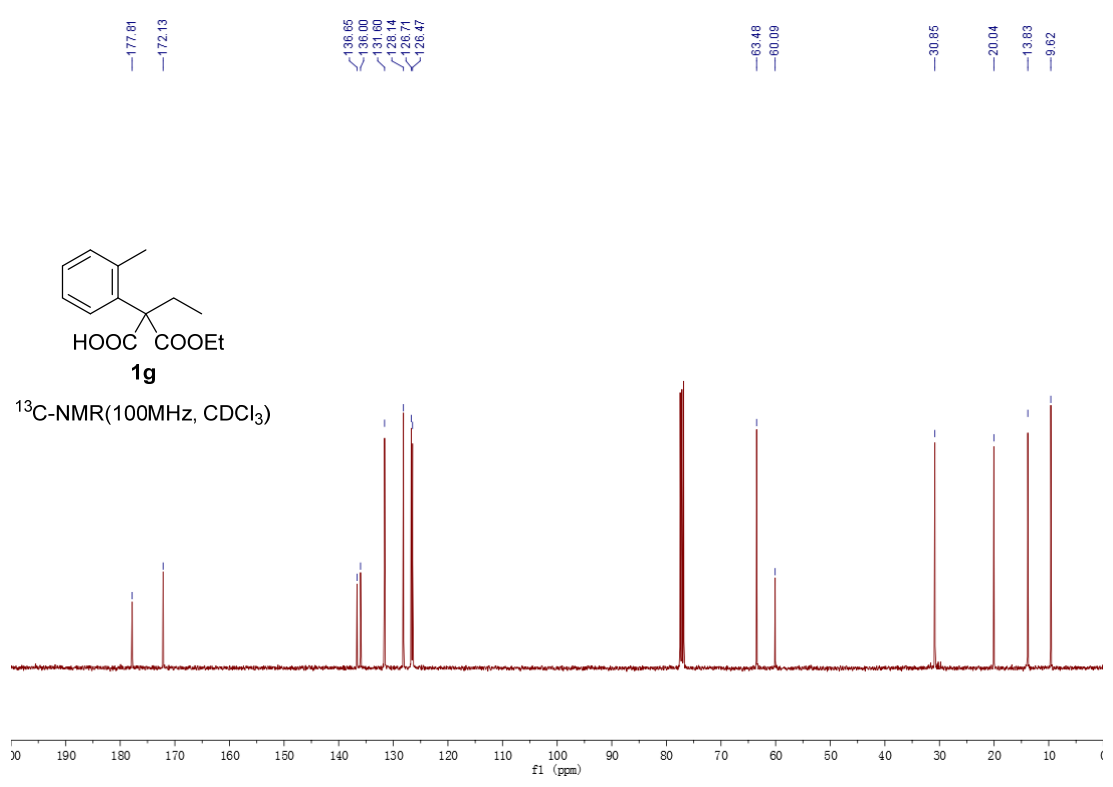

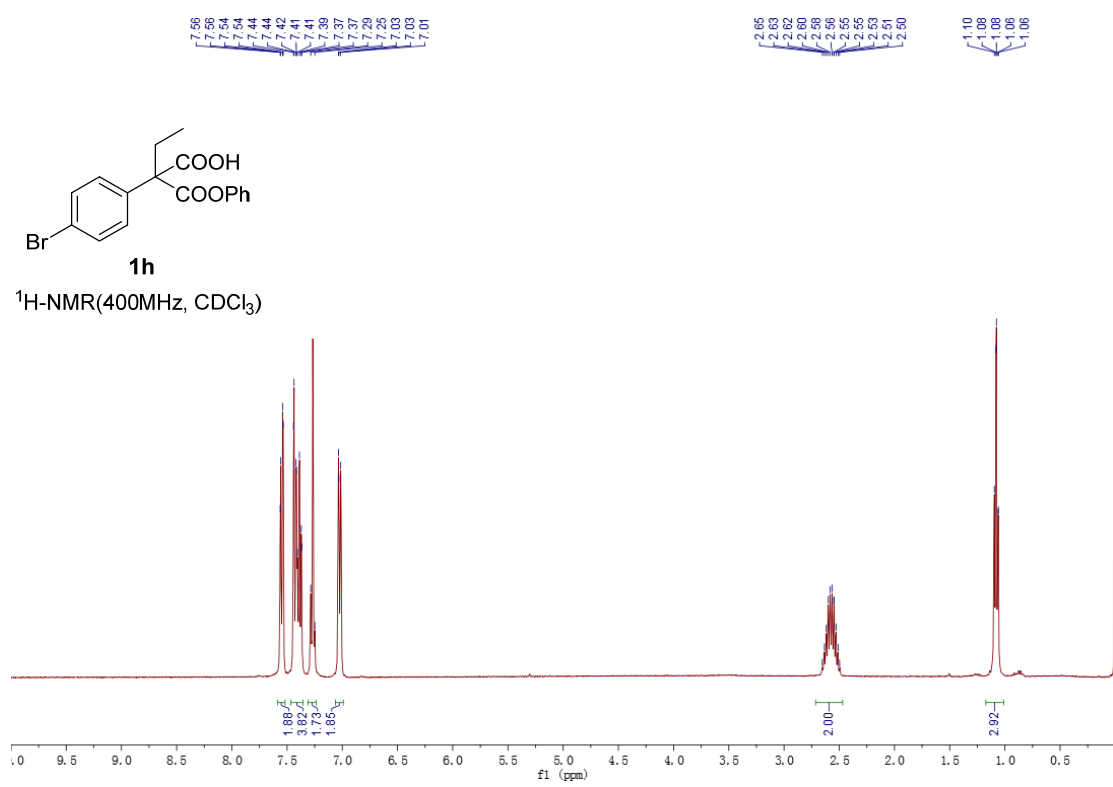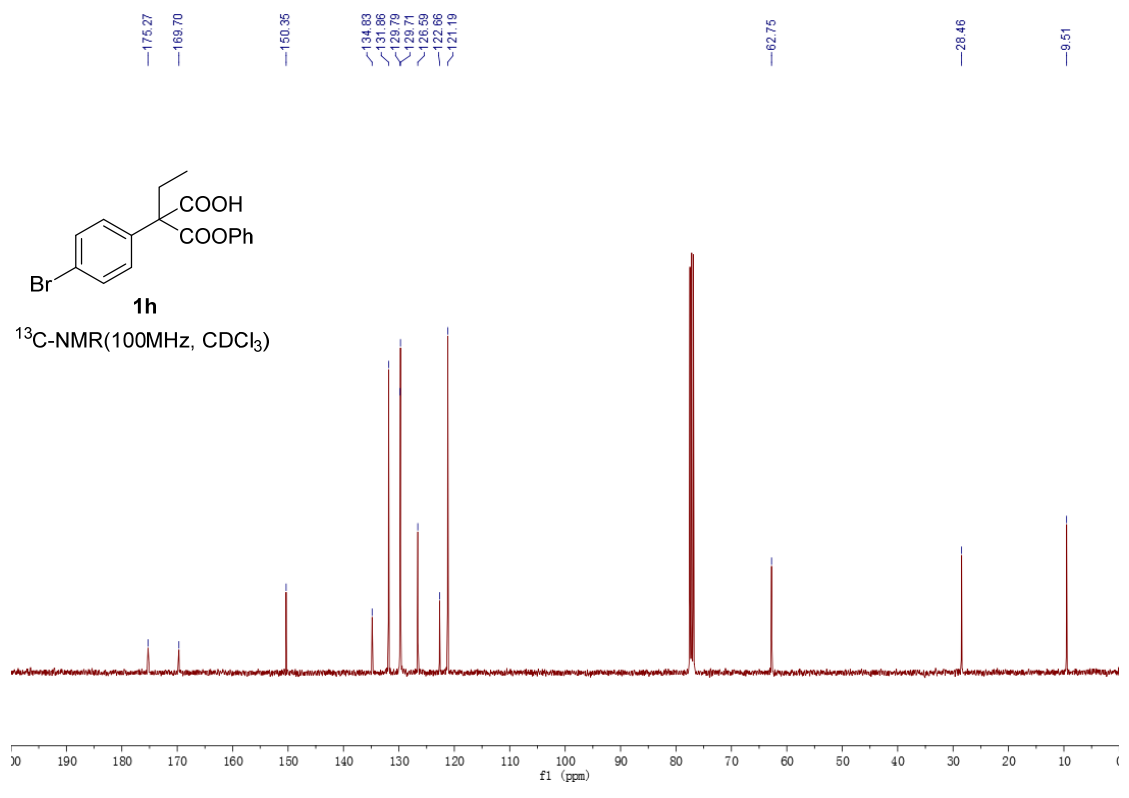

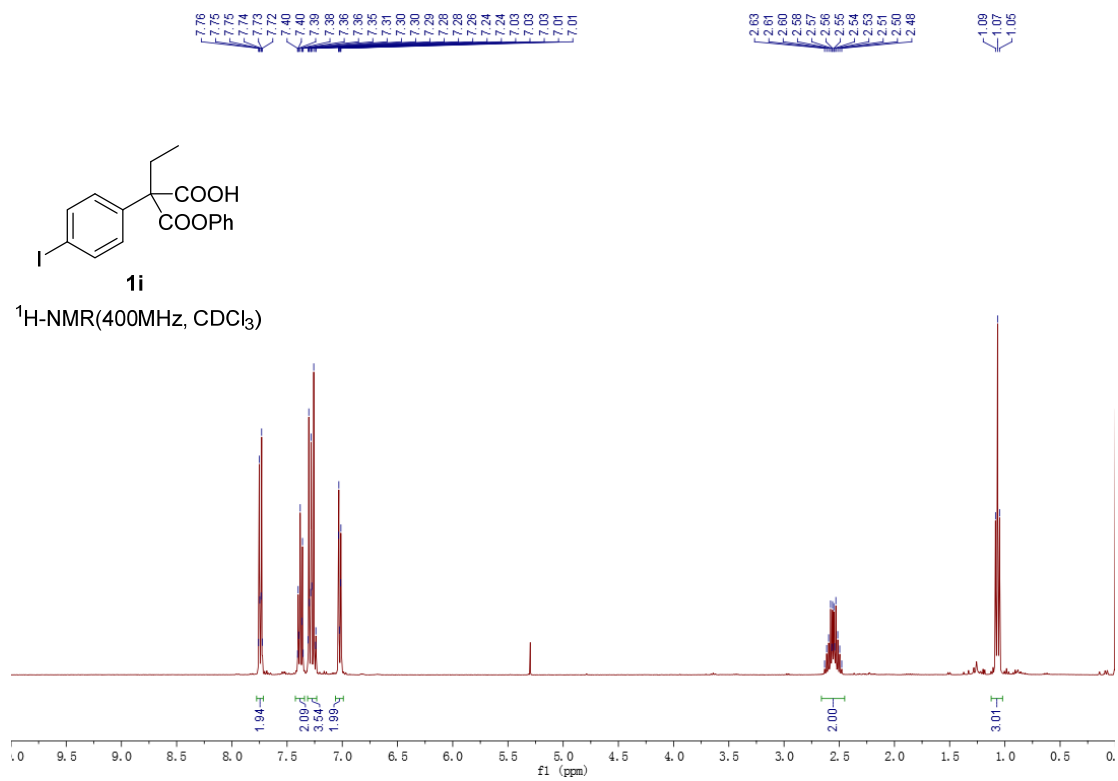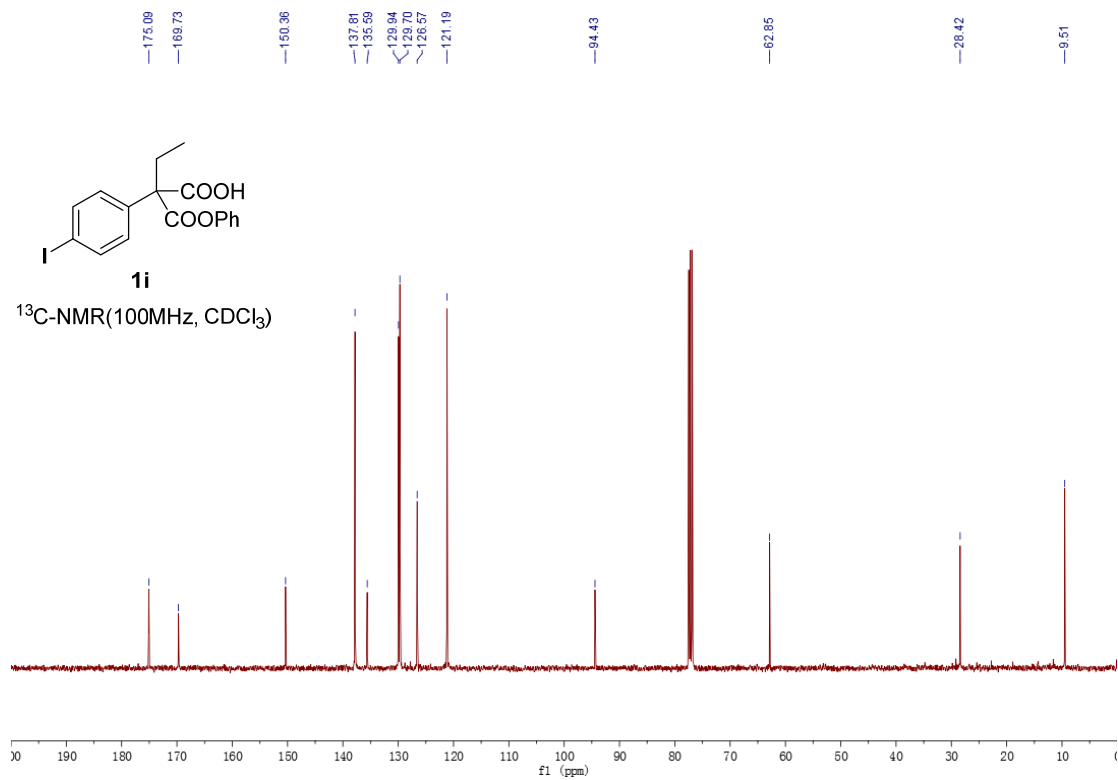



8.00  
8.00  
7.99  
7.98  
7.97  
7.44  
7.43  
7.43  
7.42  
7.41  
7.34  
7.34  
7.33  
7.33  
7.32  
7.32  
7.31  
7.25  
7.24  
7.23  
7.23  
7.21  
7.21  
5.28  
5.27  
5.25  
5.23  
3.93  
3.92  
2.59  
2.57  
2.55  
2.55  
2.54  
2.52  
2.50  
2.45  
2.43  
2.41  
2.40  
2.38  
2.36  
0.93  
0.91  
0.89

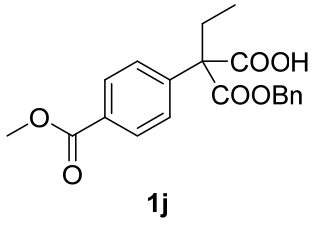

$^1\text{H-NMR}$ (400 MHz,  $\text{CDCl}_3$ )

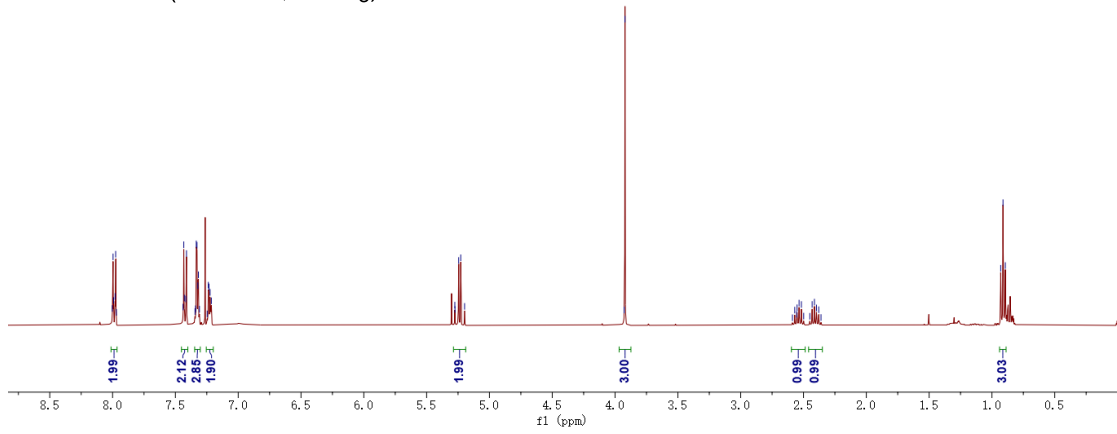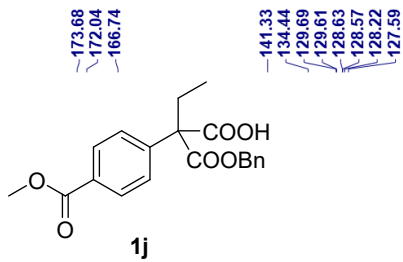

$^{13}\text{C-NMR}$ (100 MHz,  $\text{CDCl}_3$ )

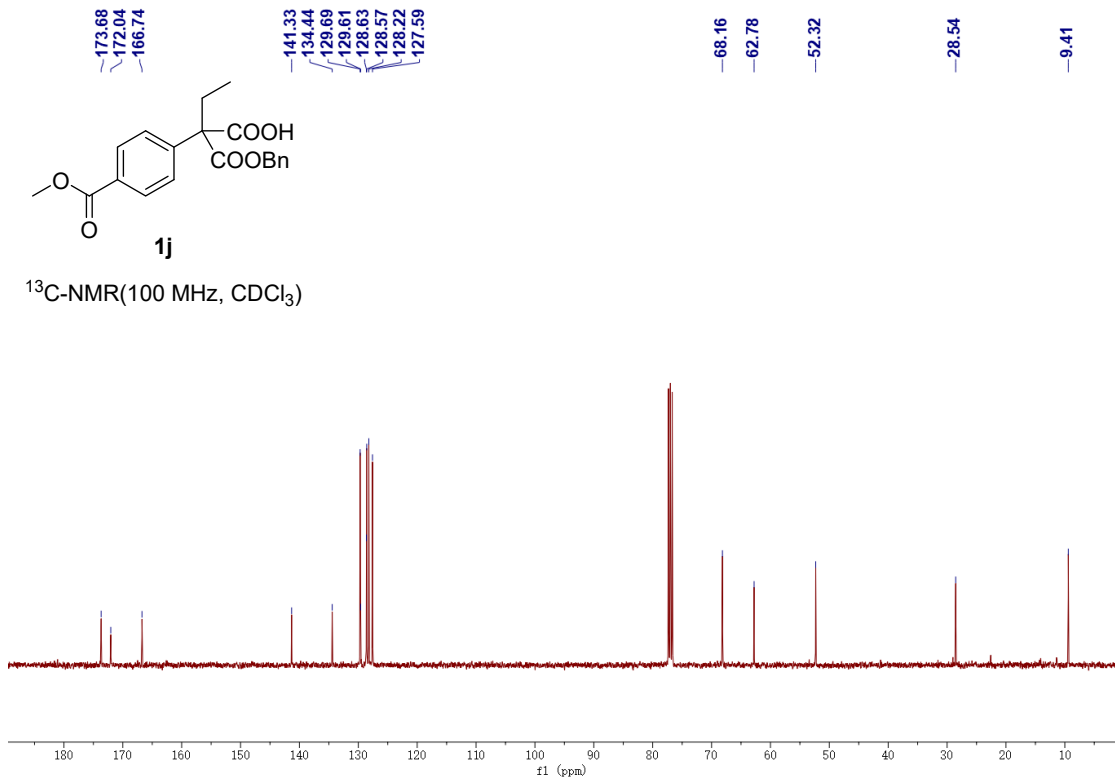

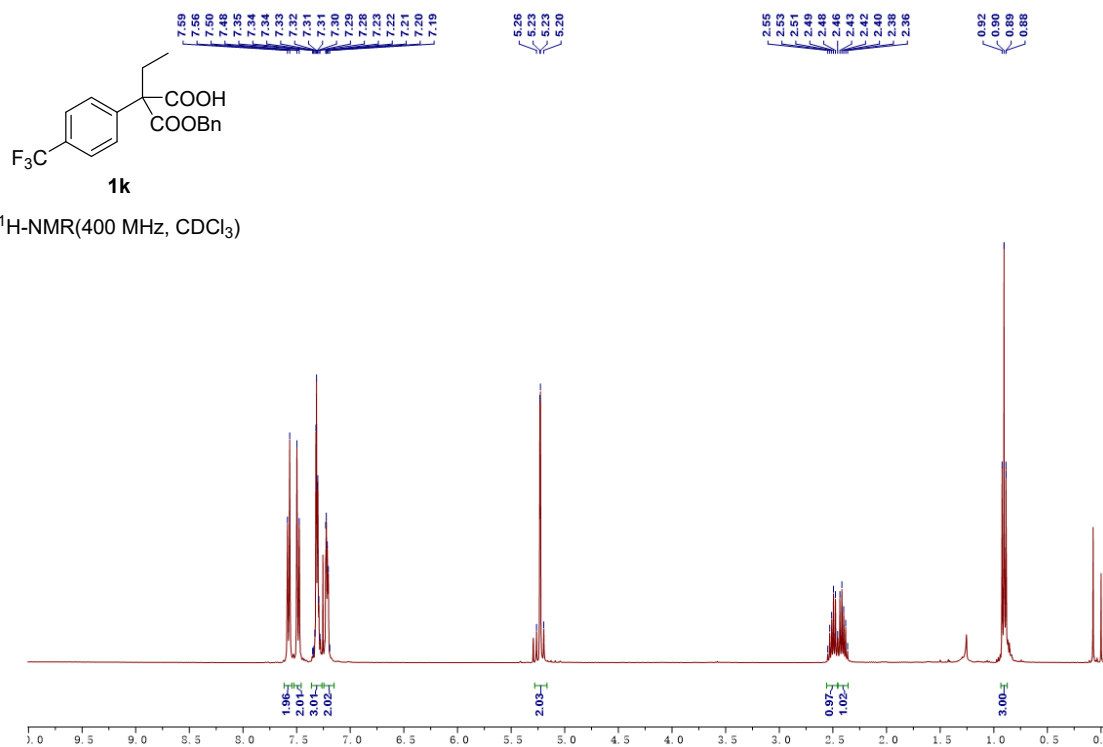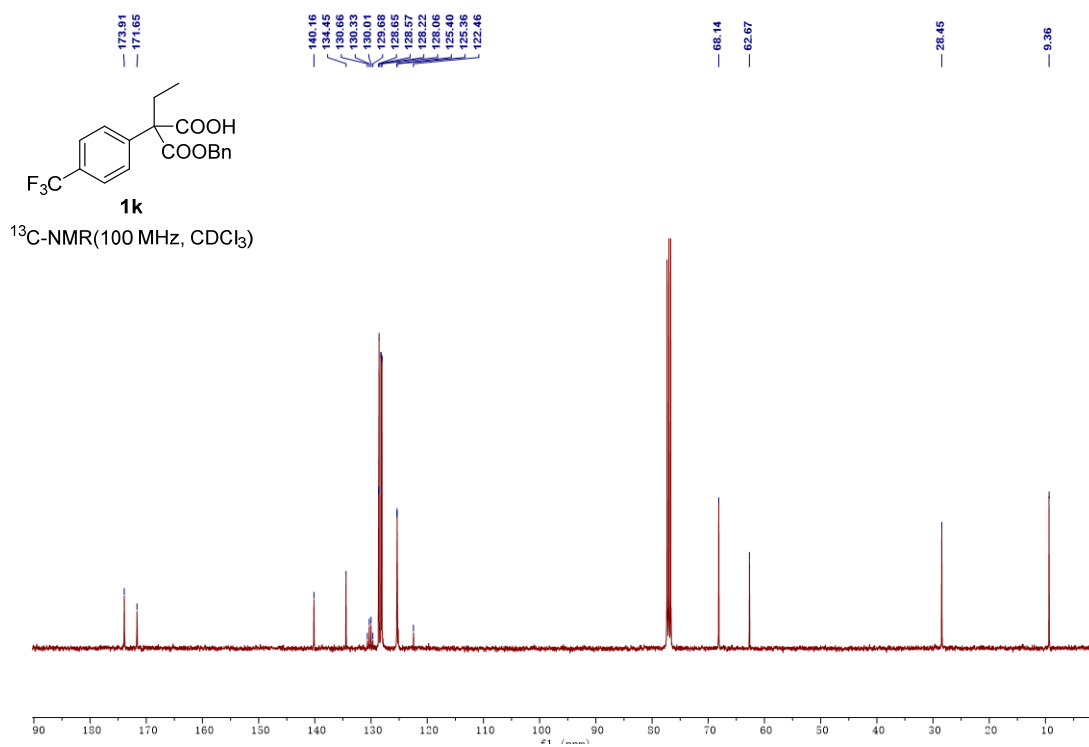

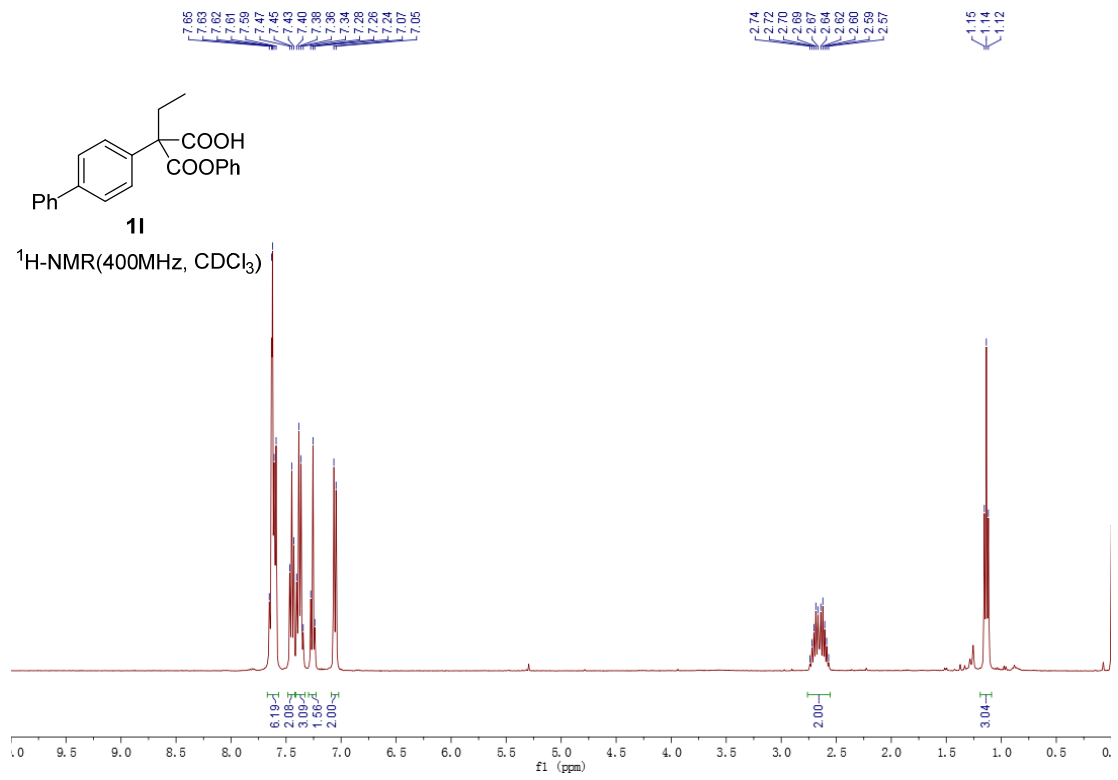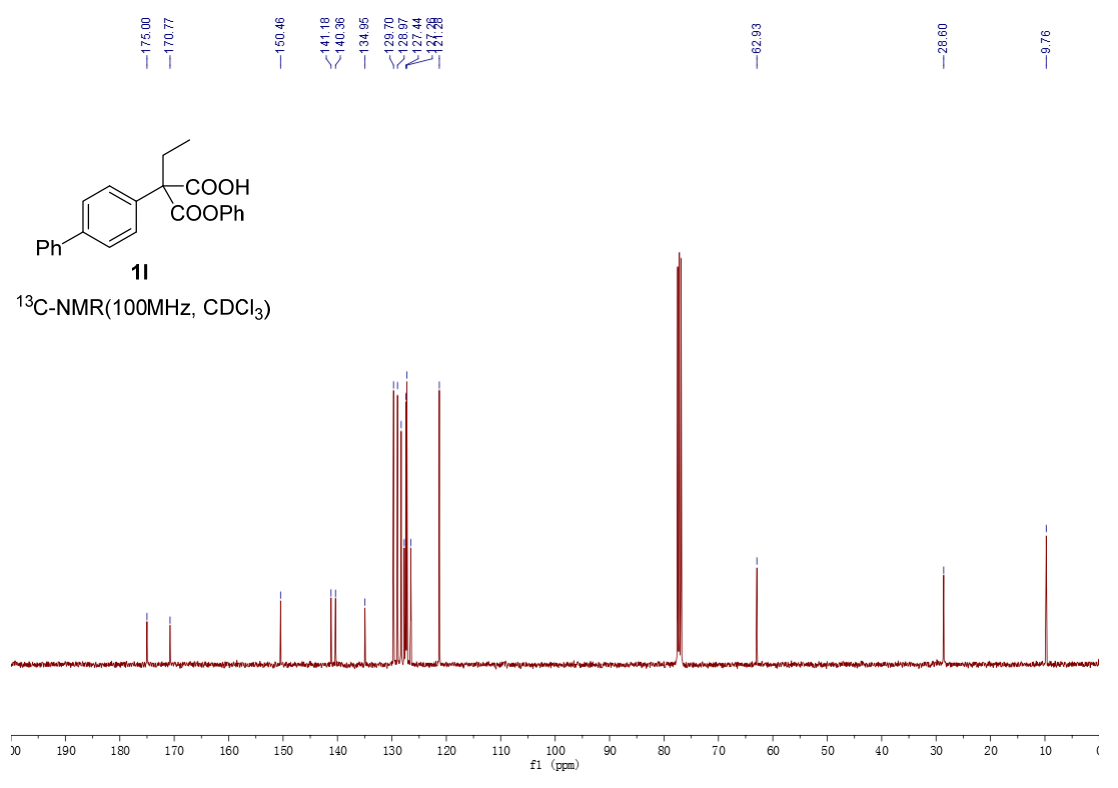

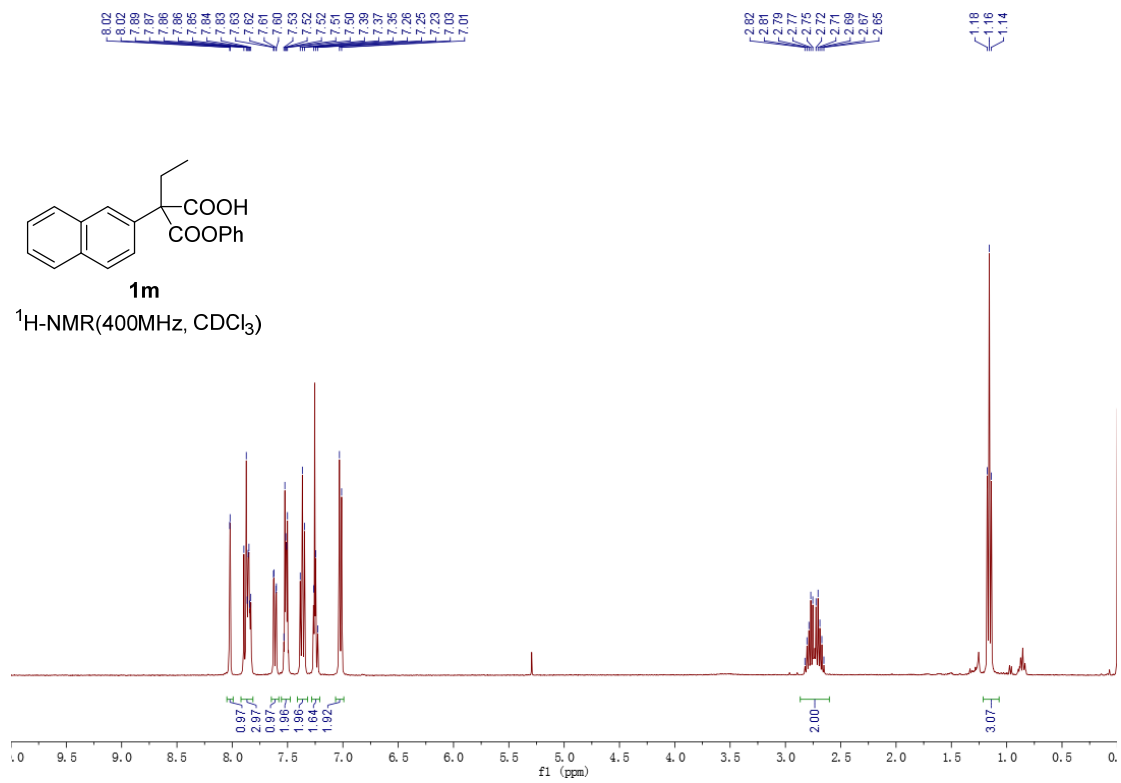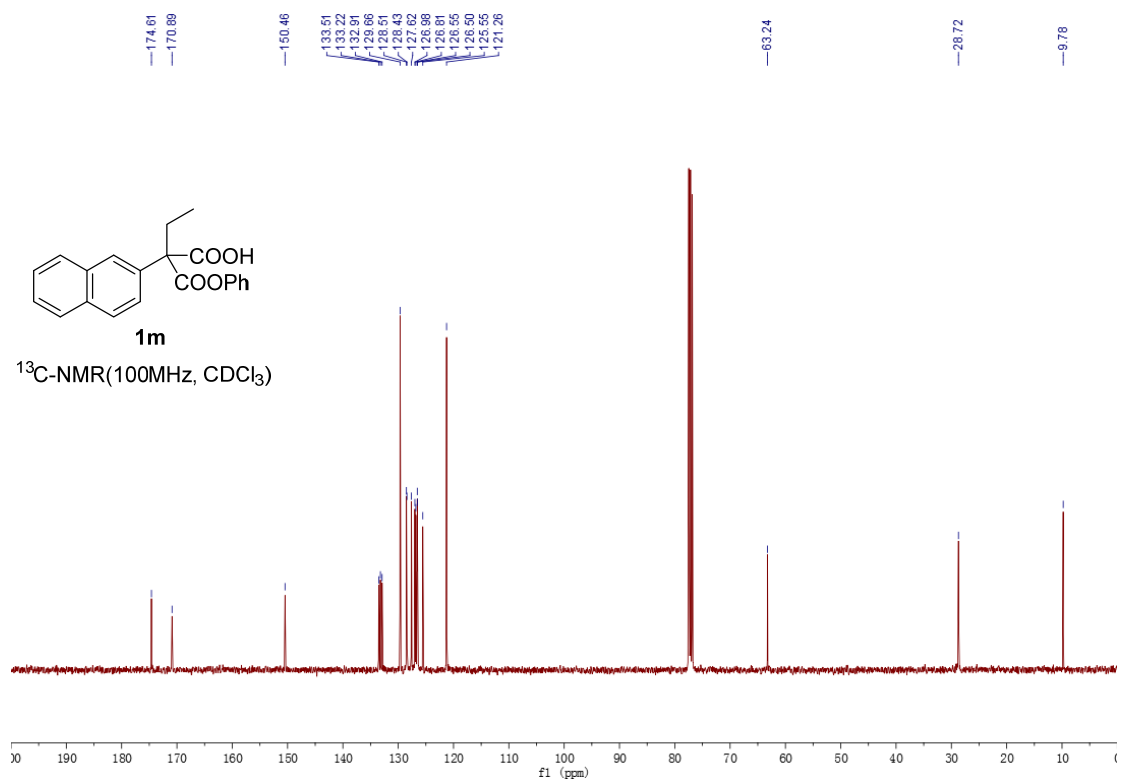

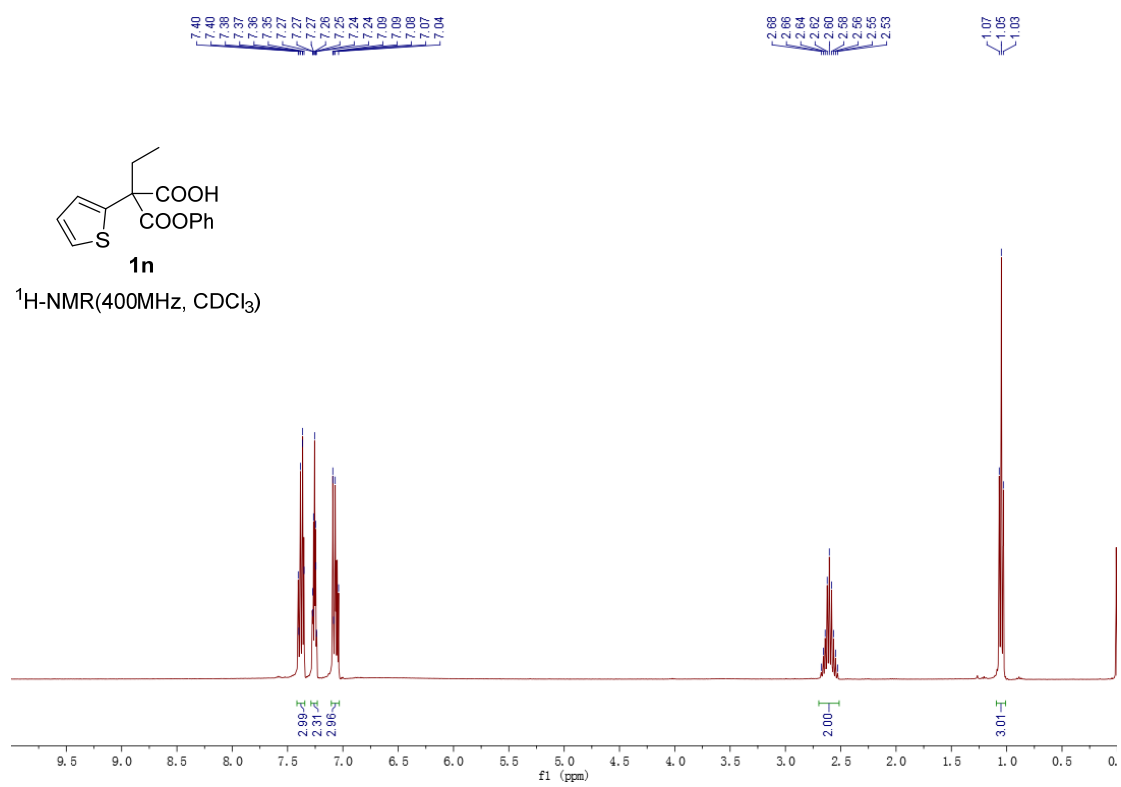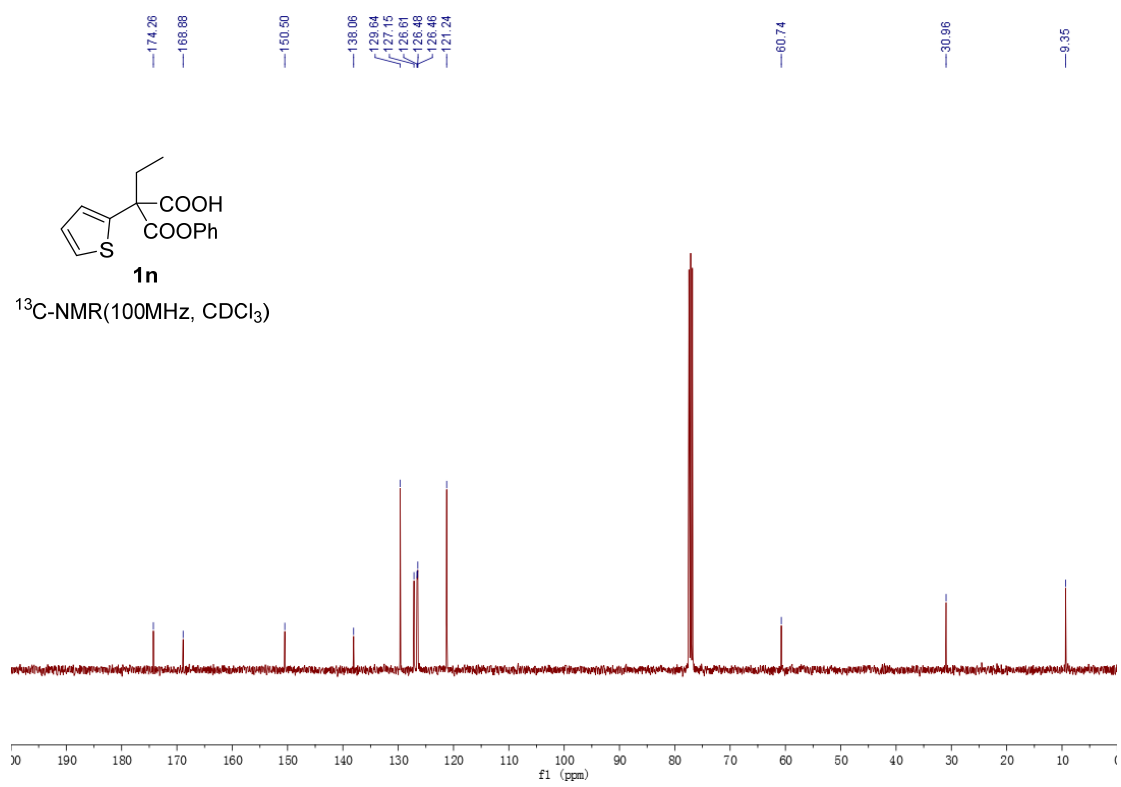

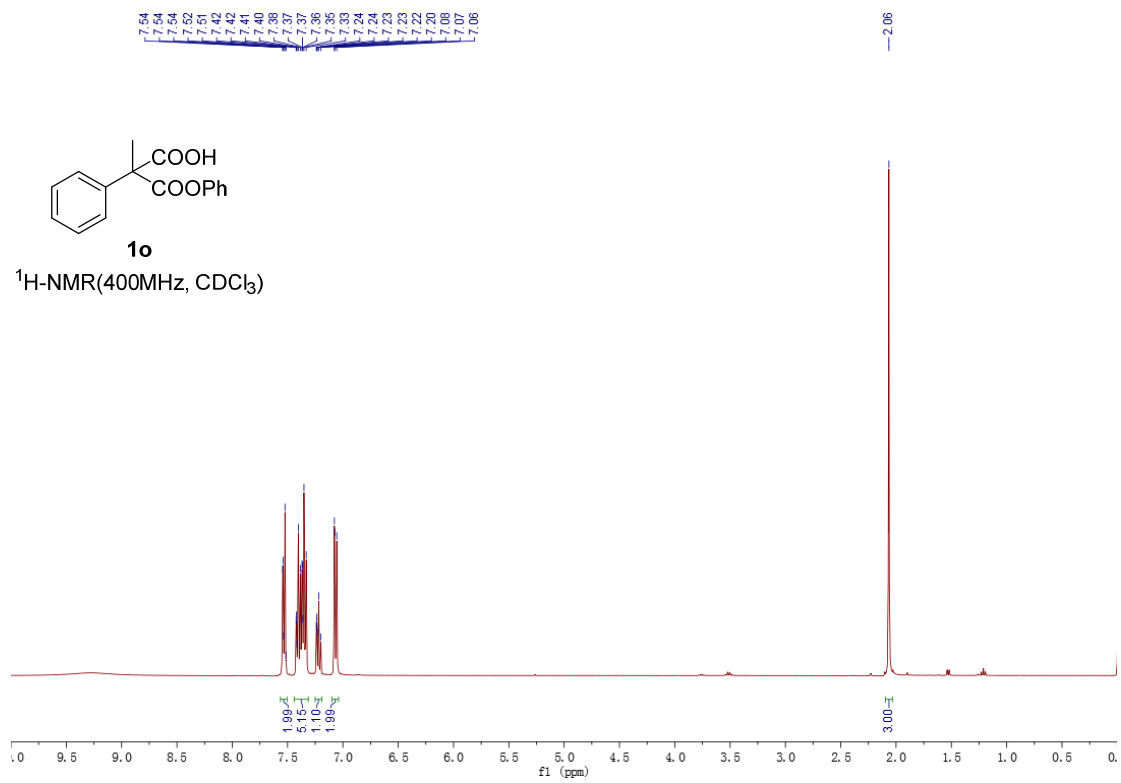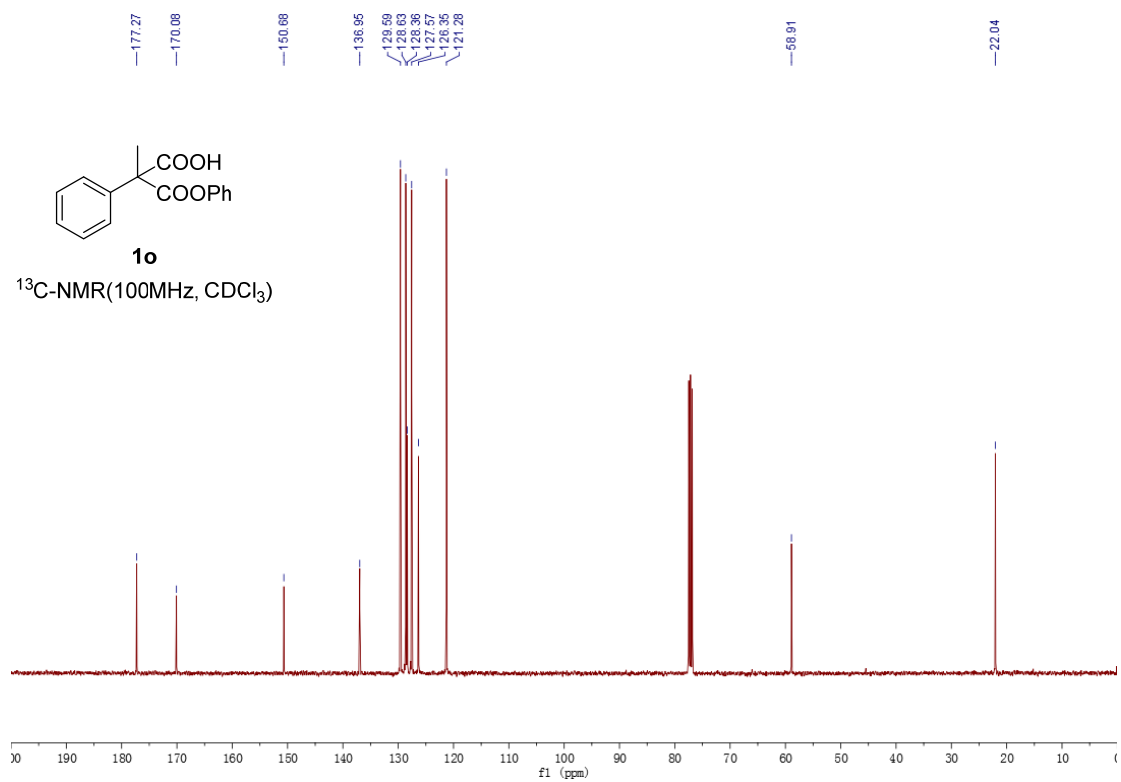

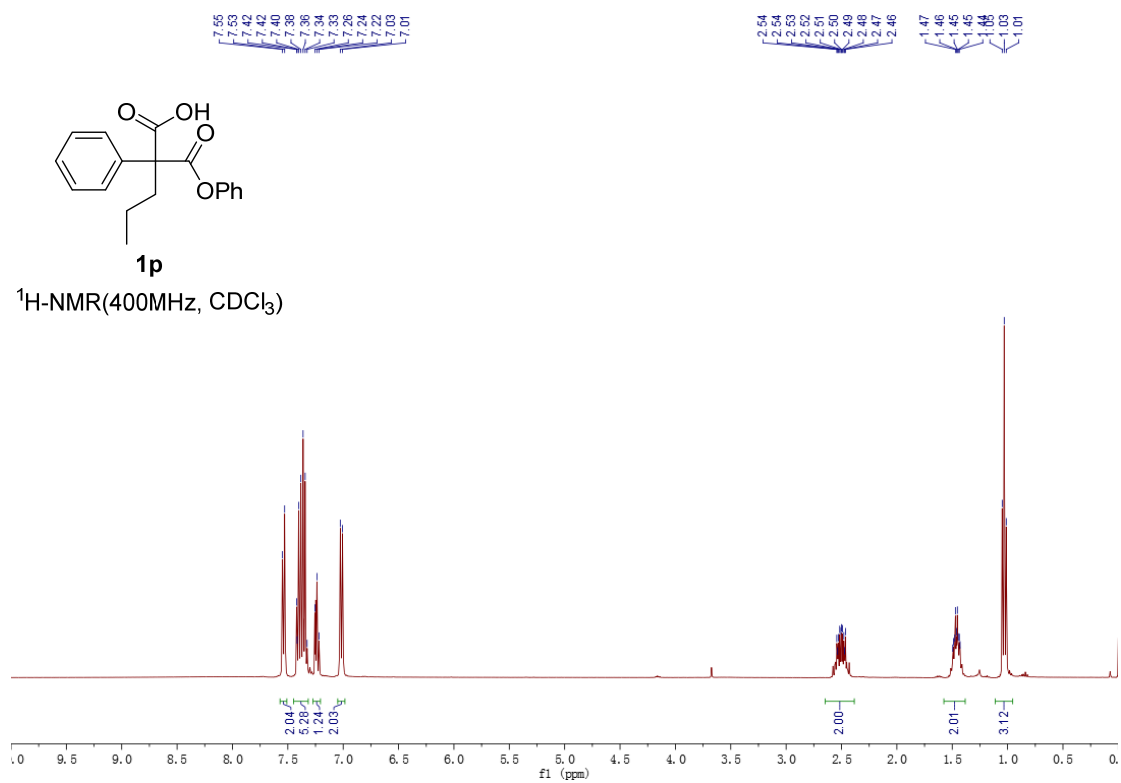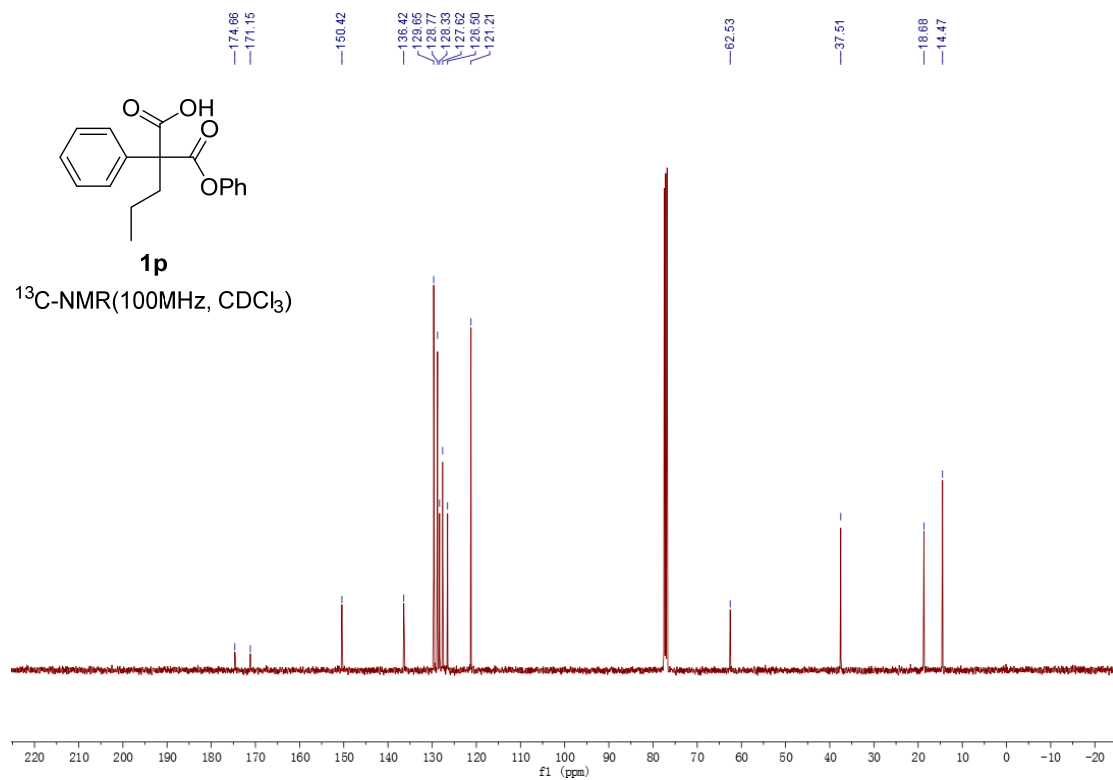

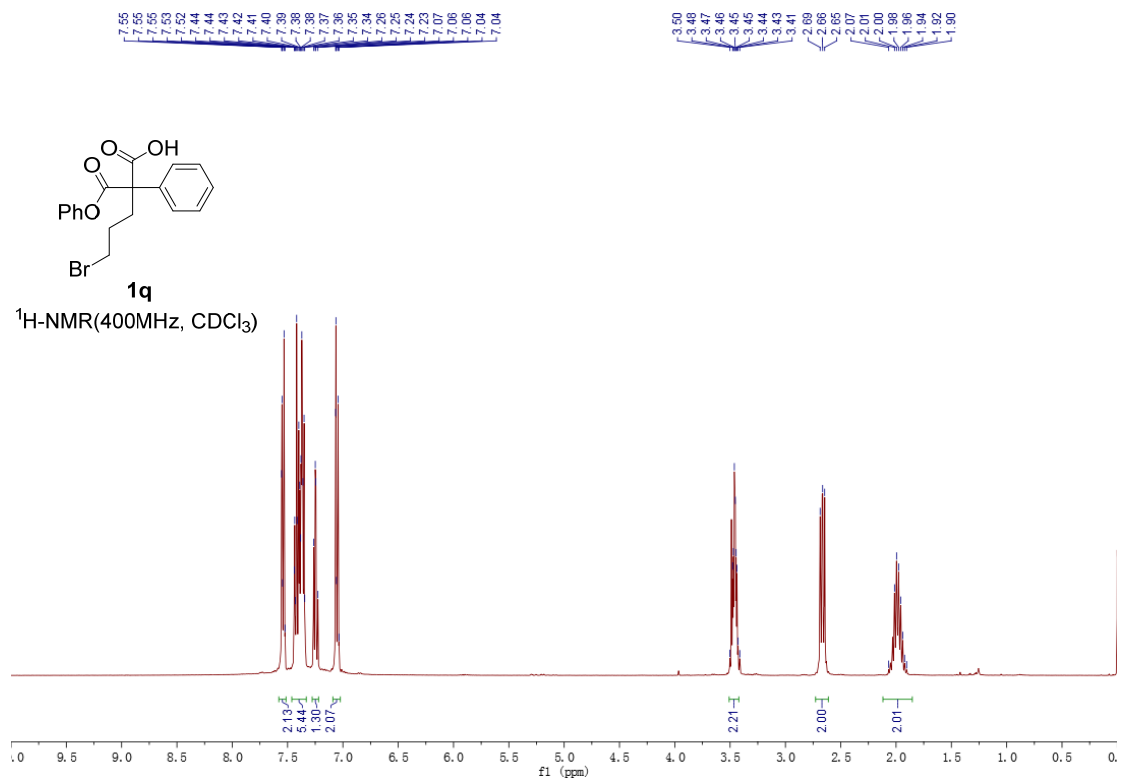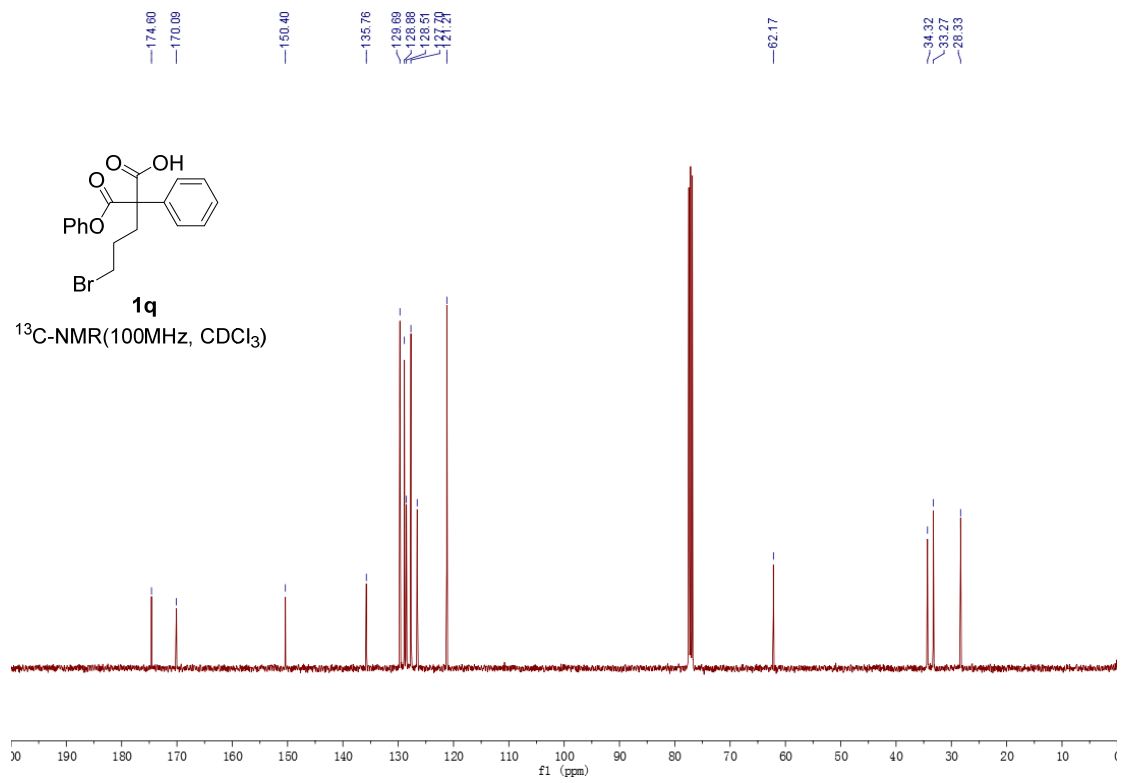



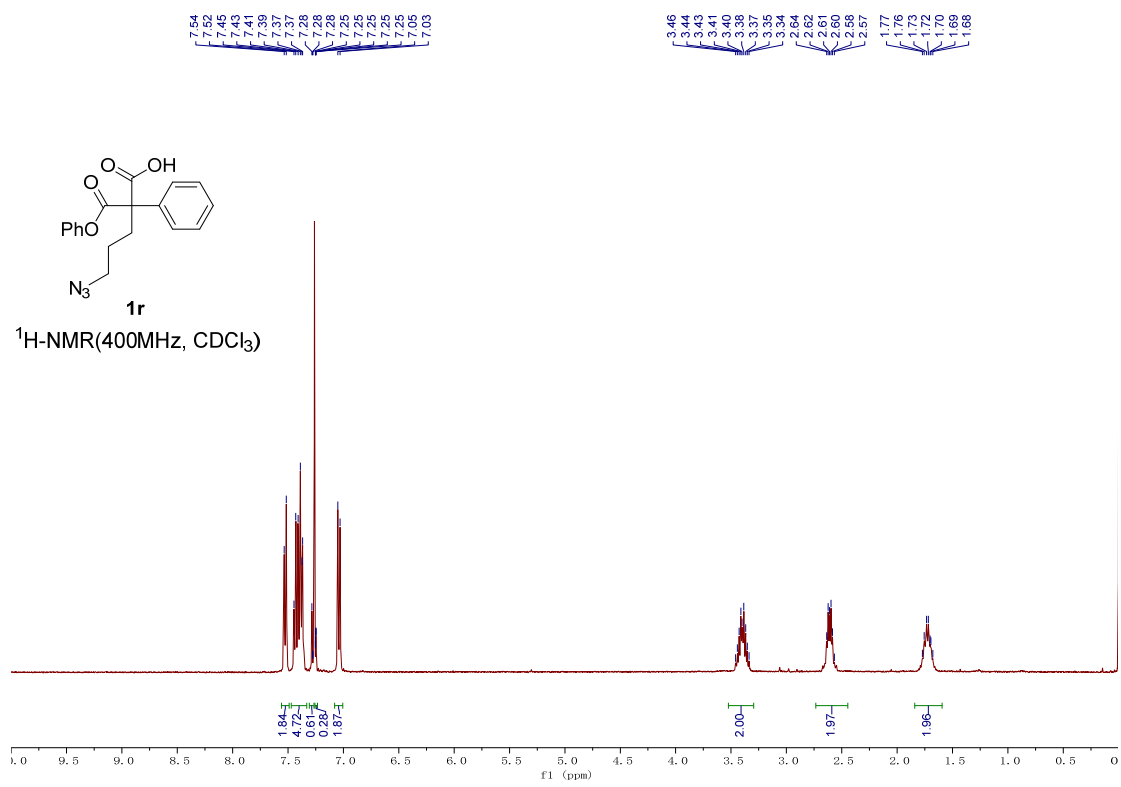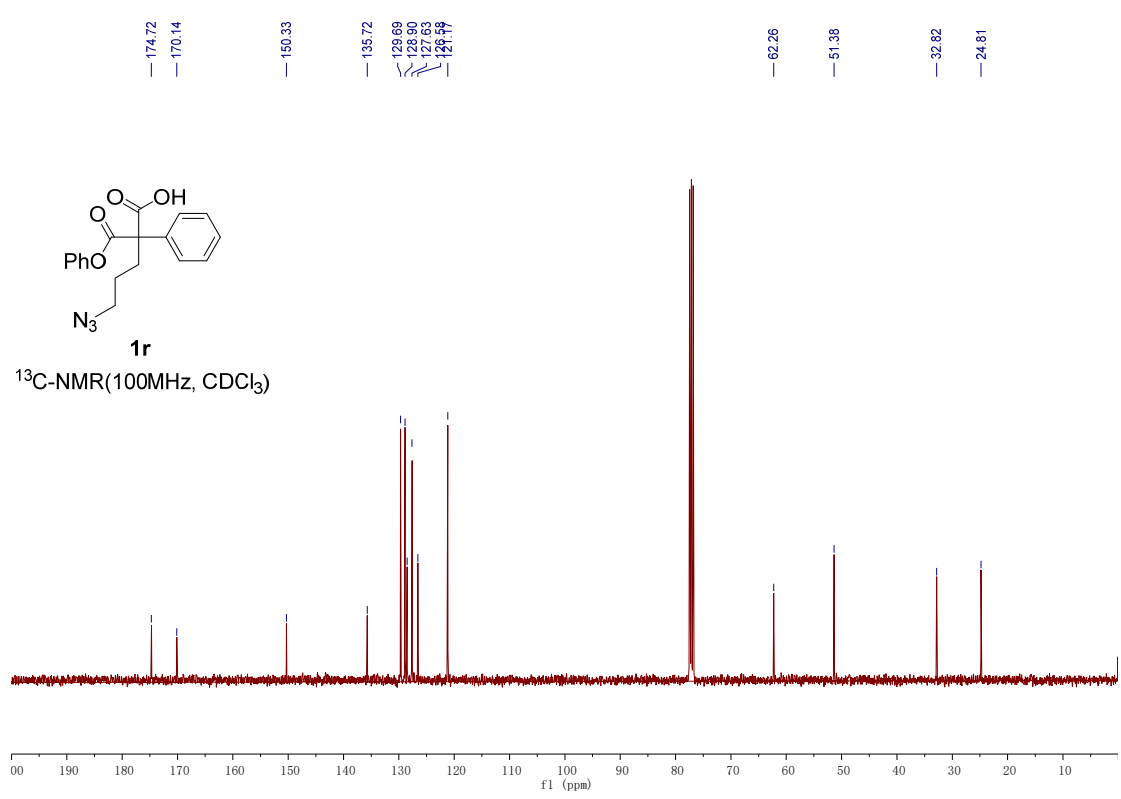

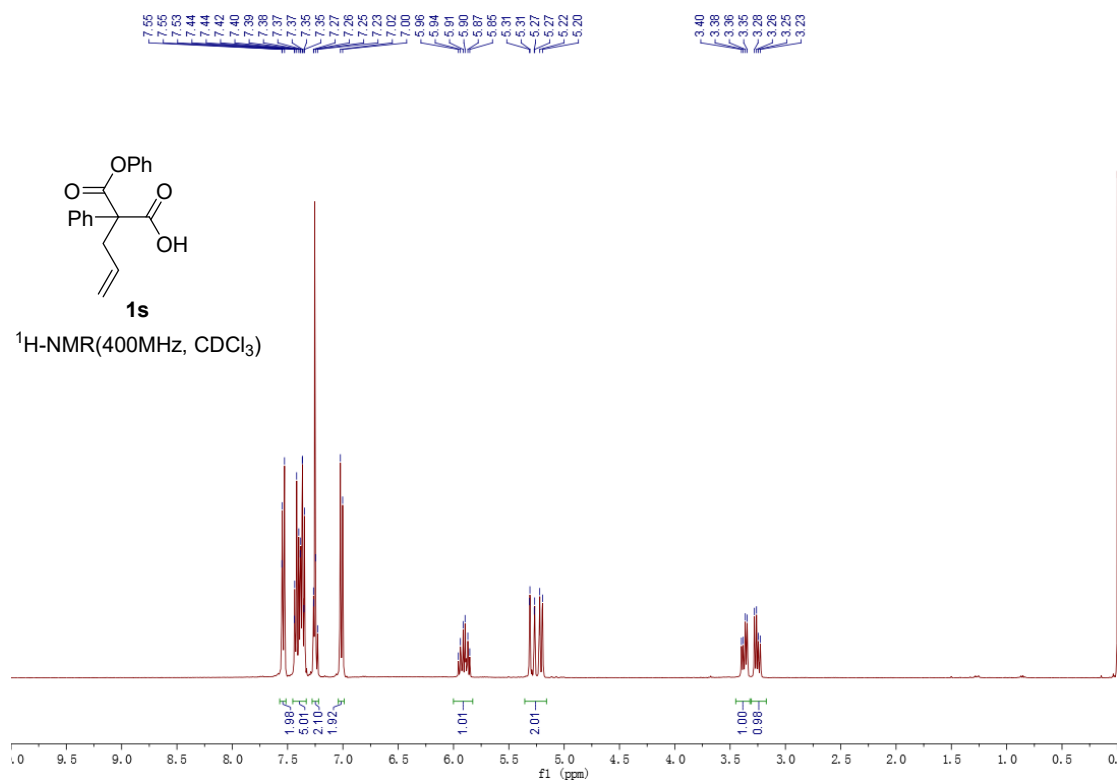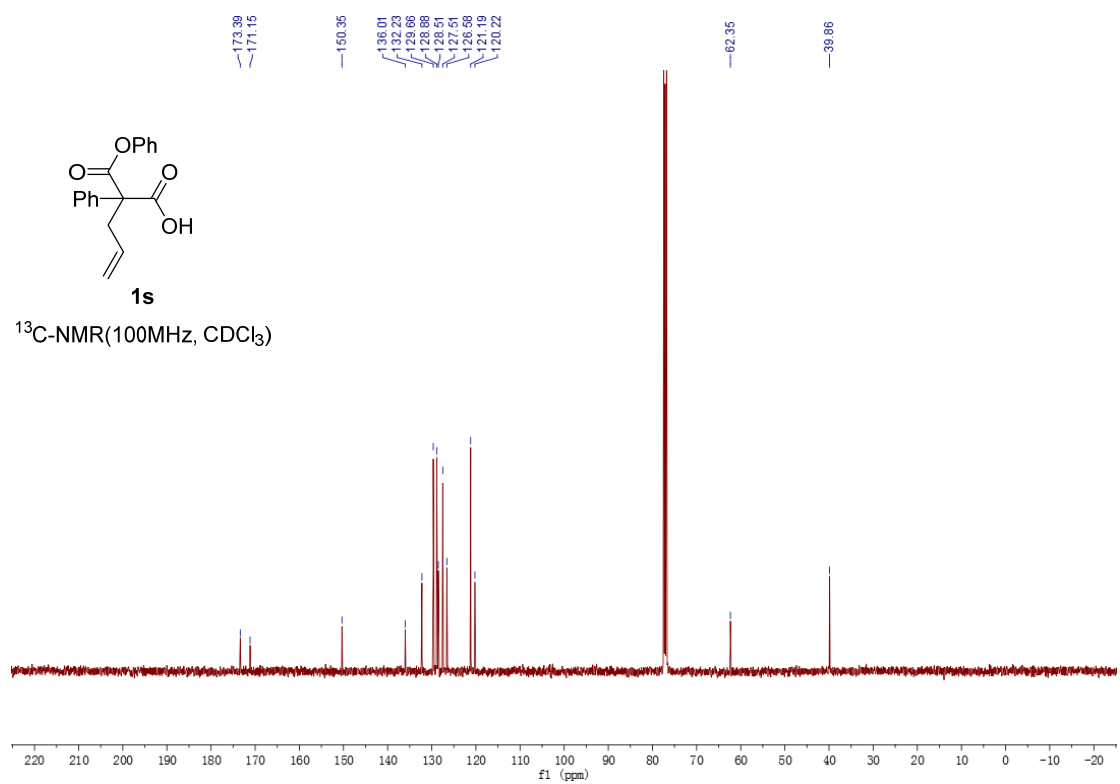

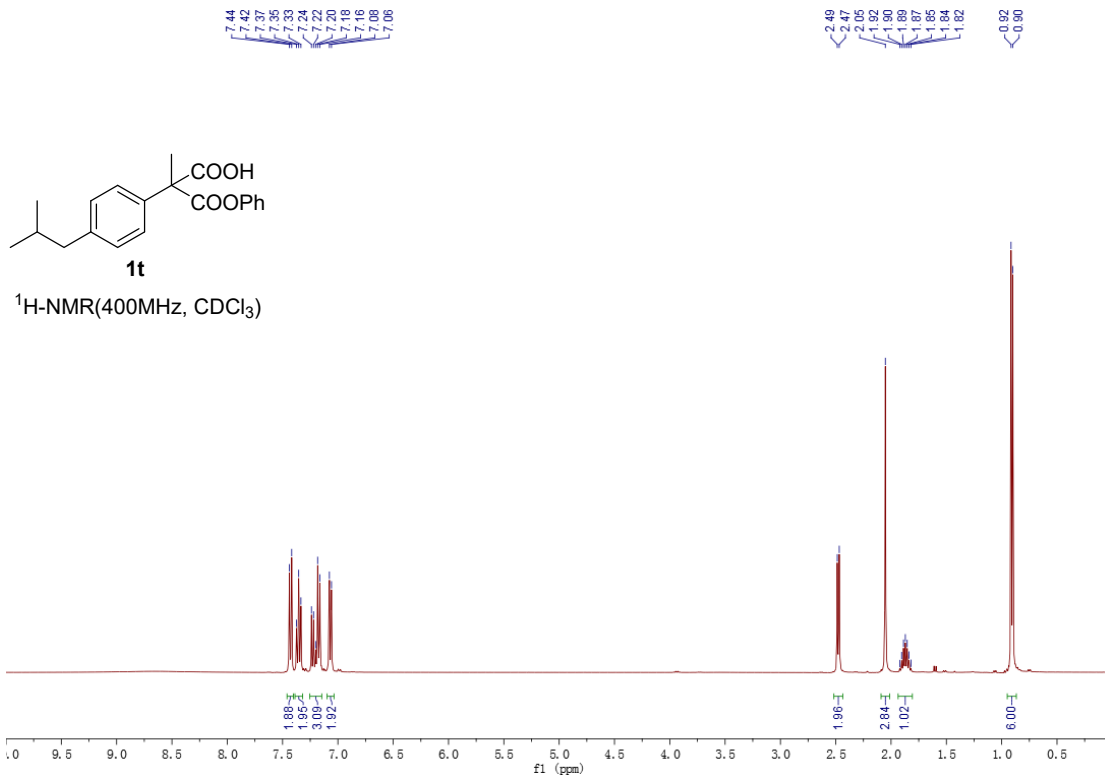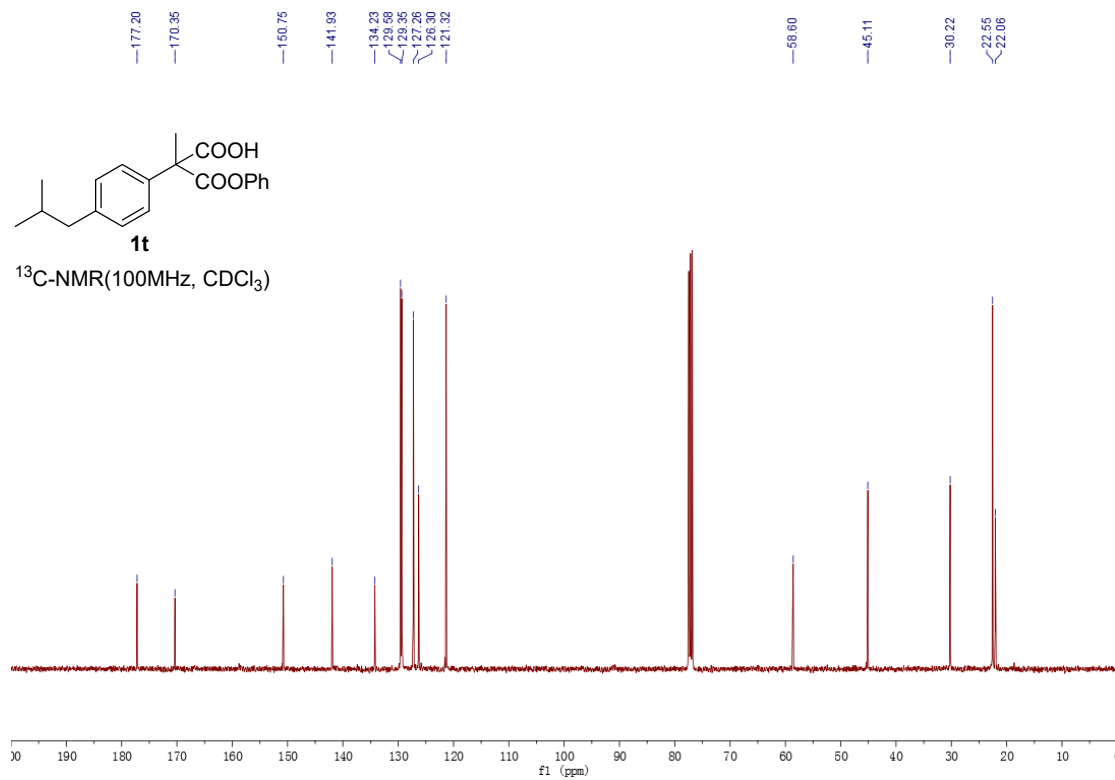

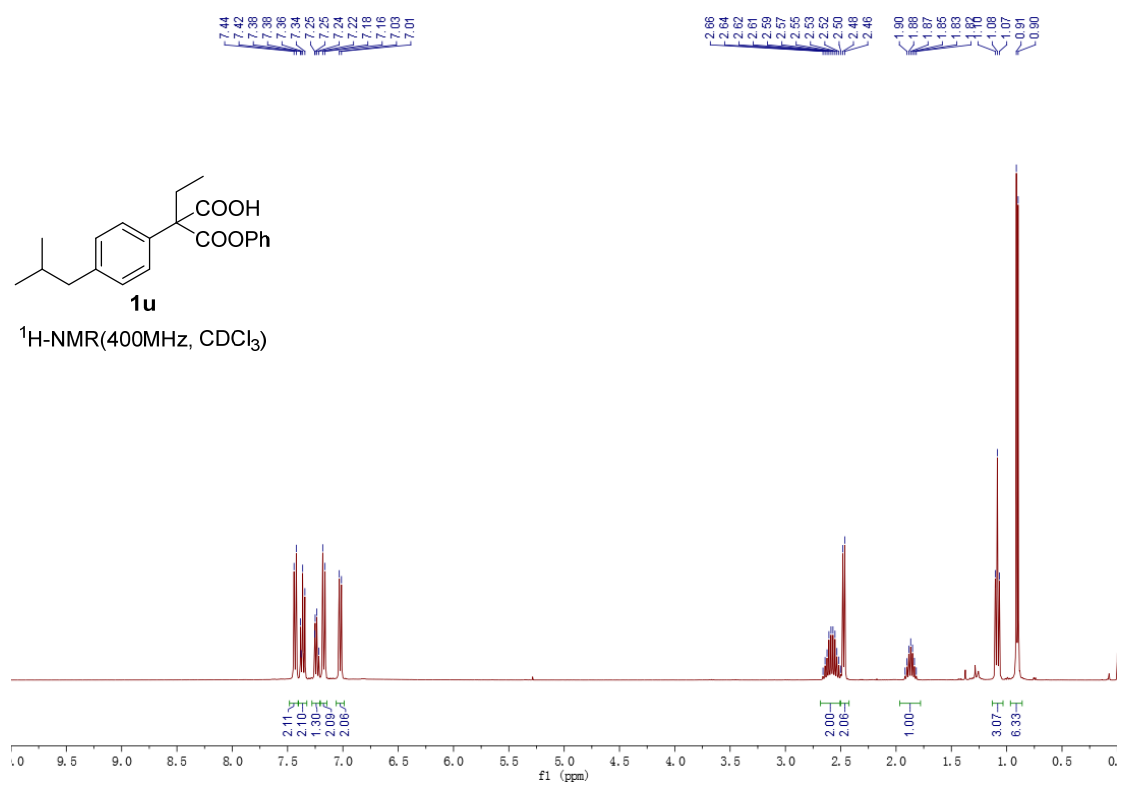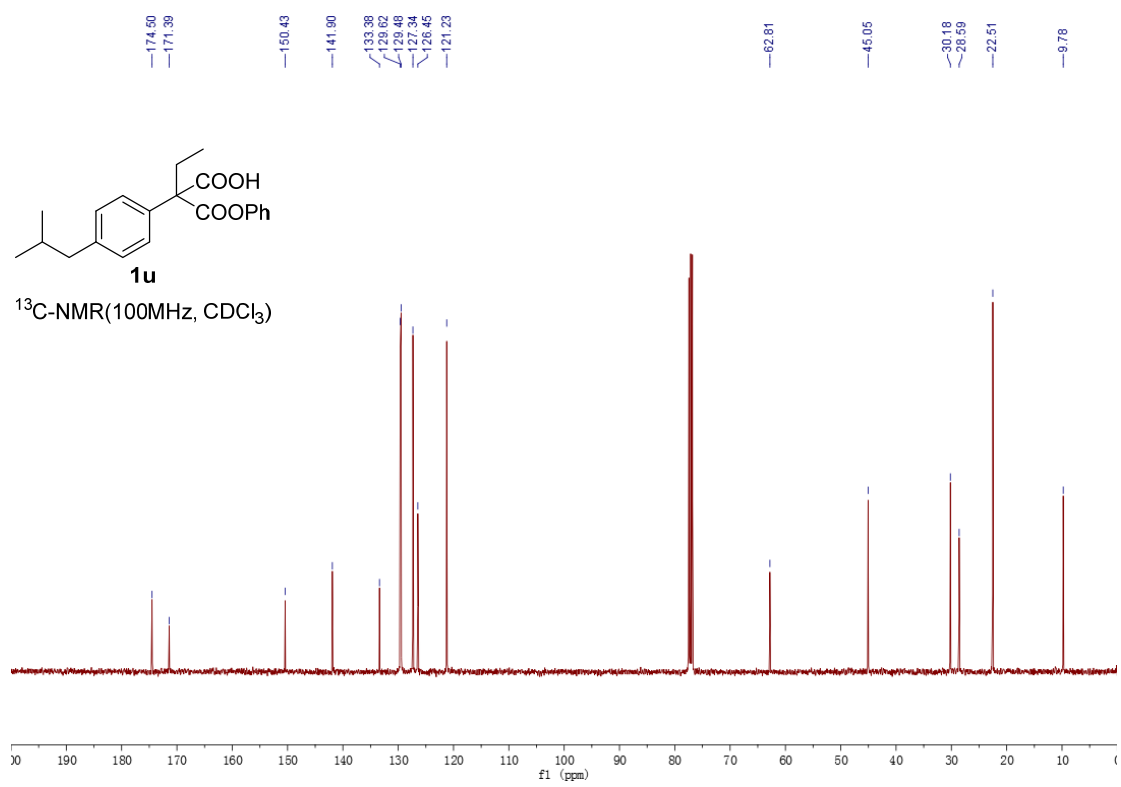

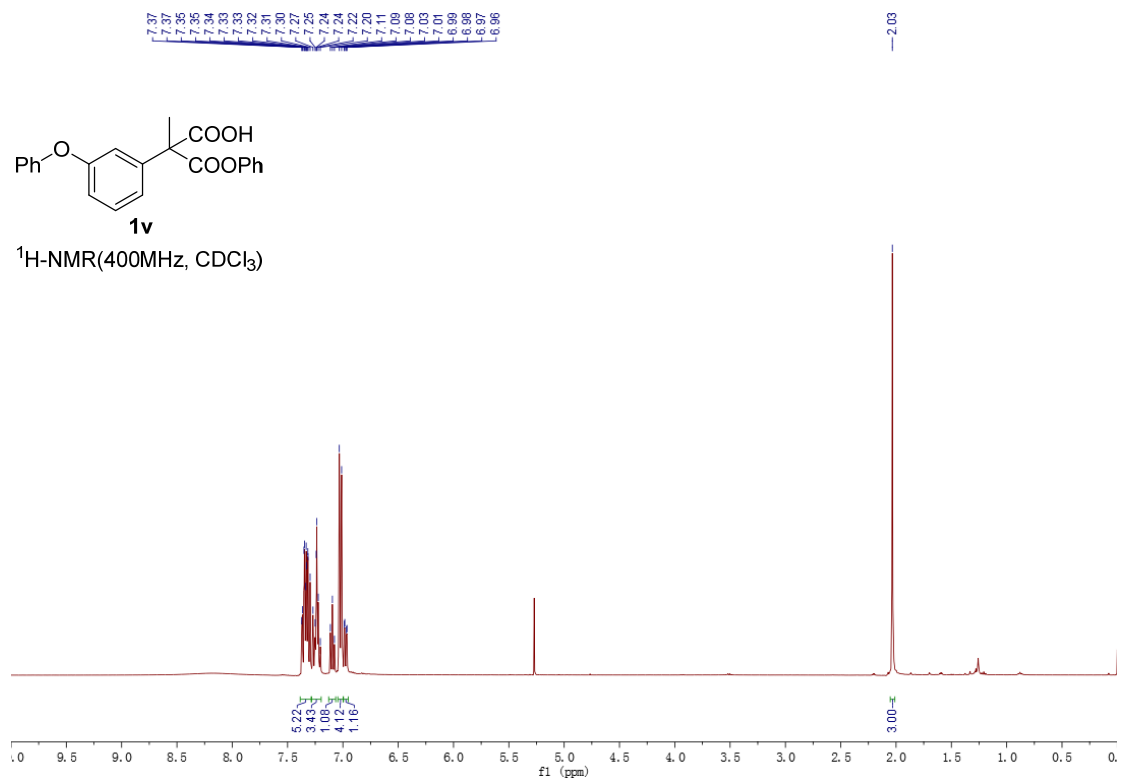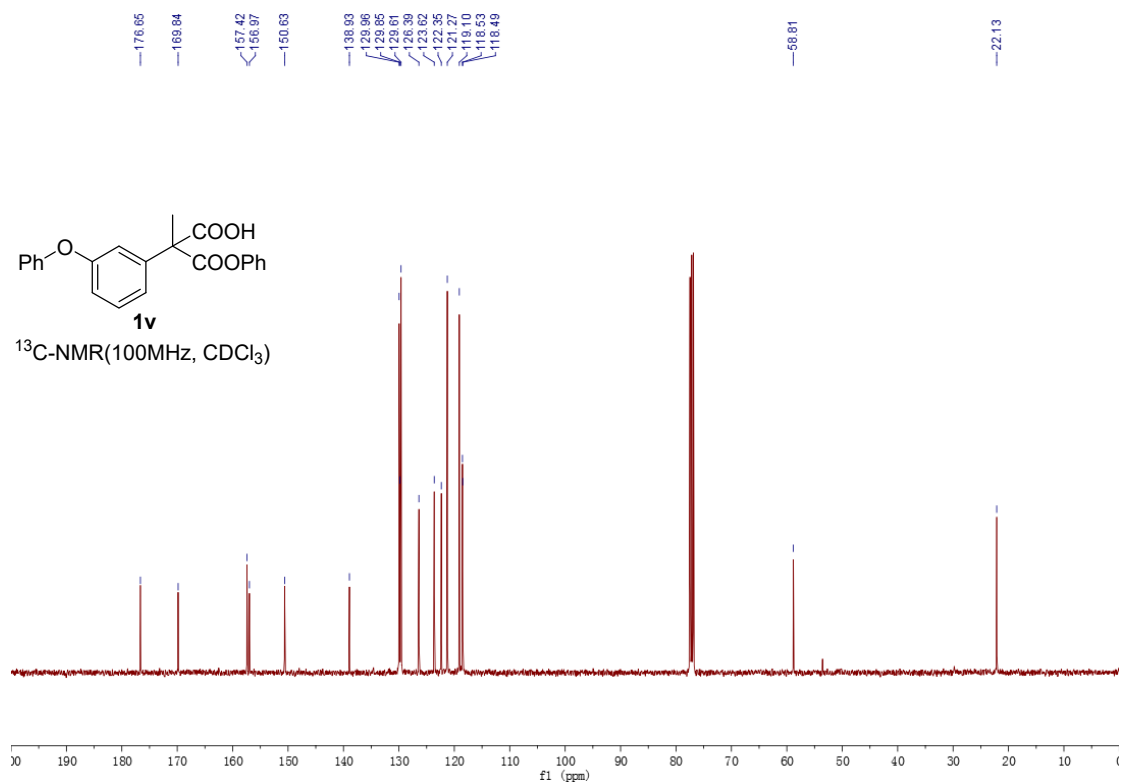

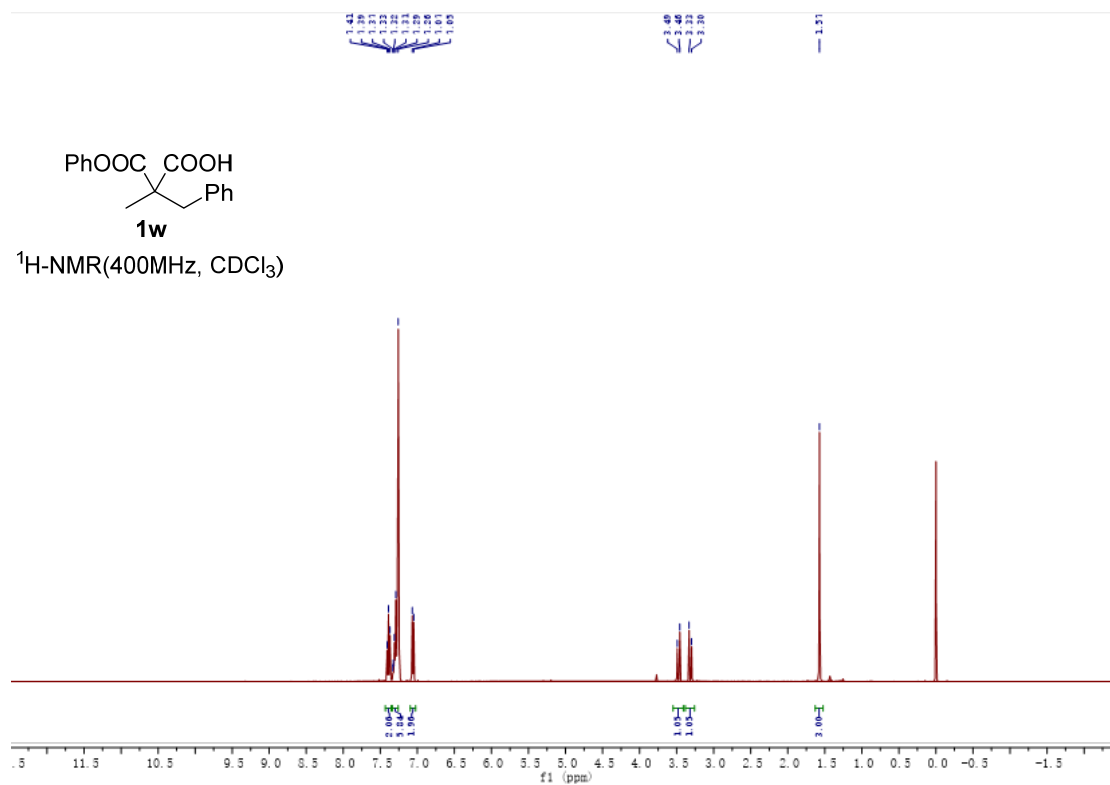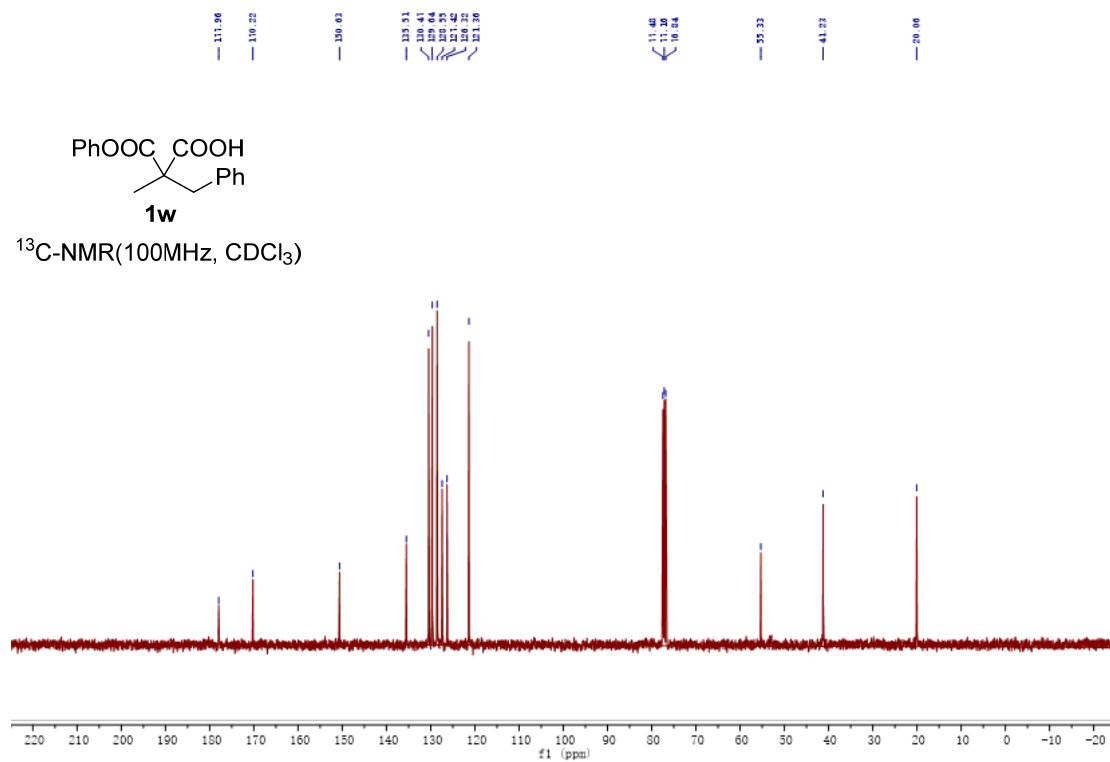

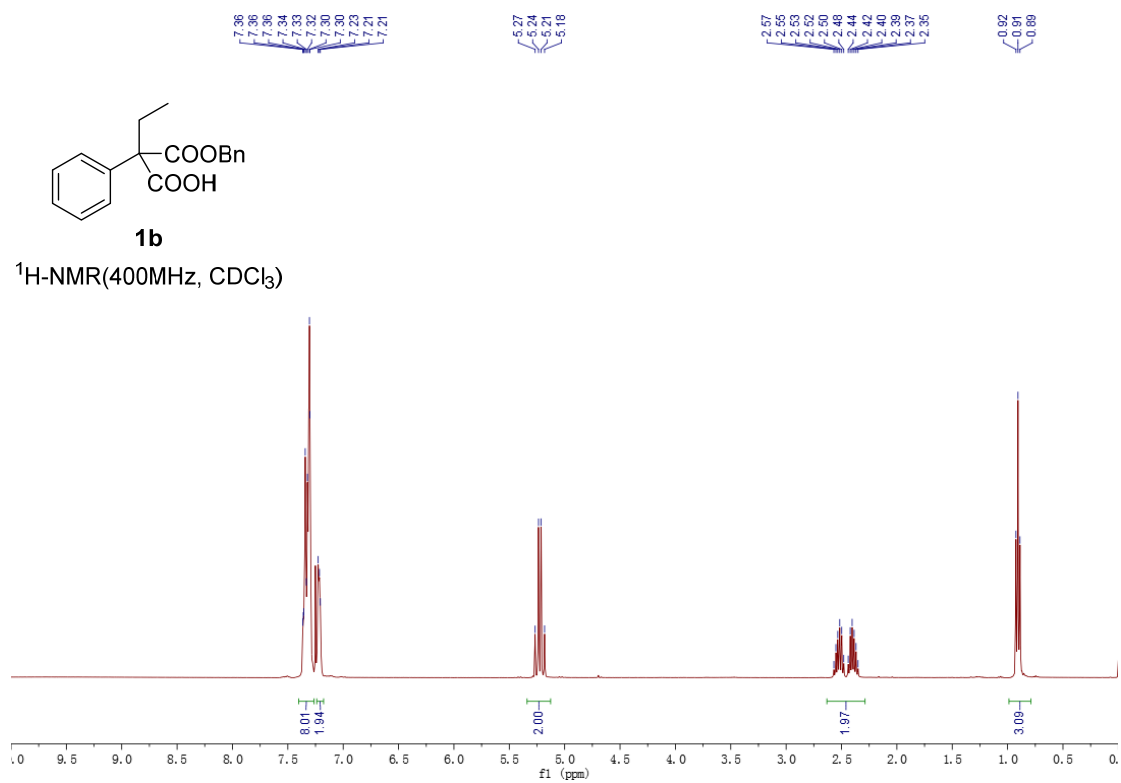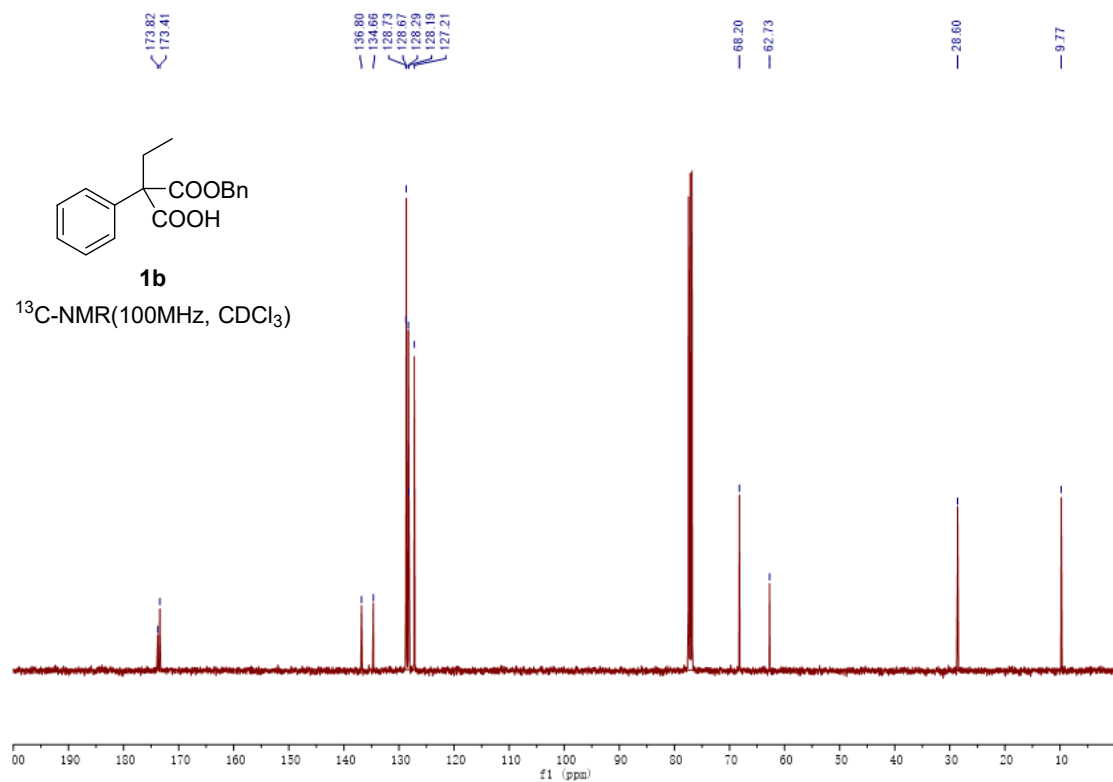

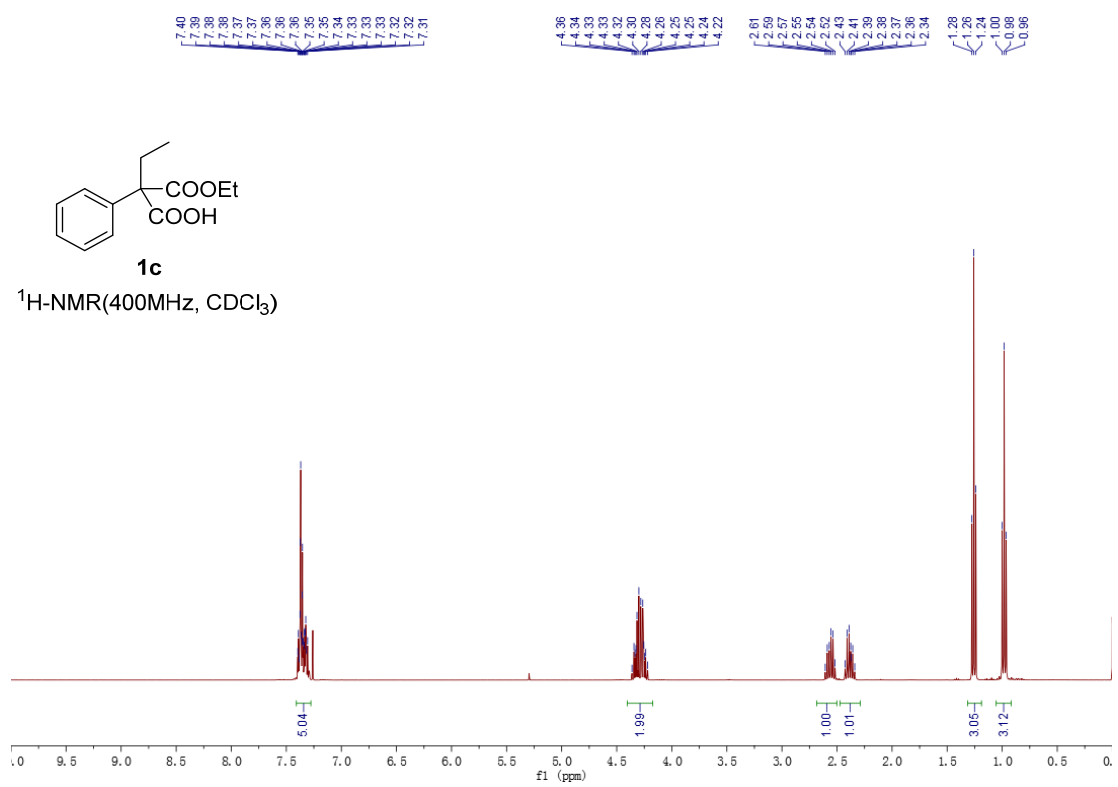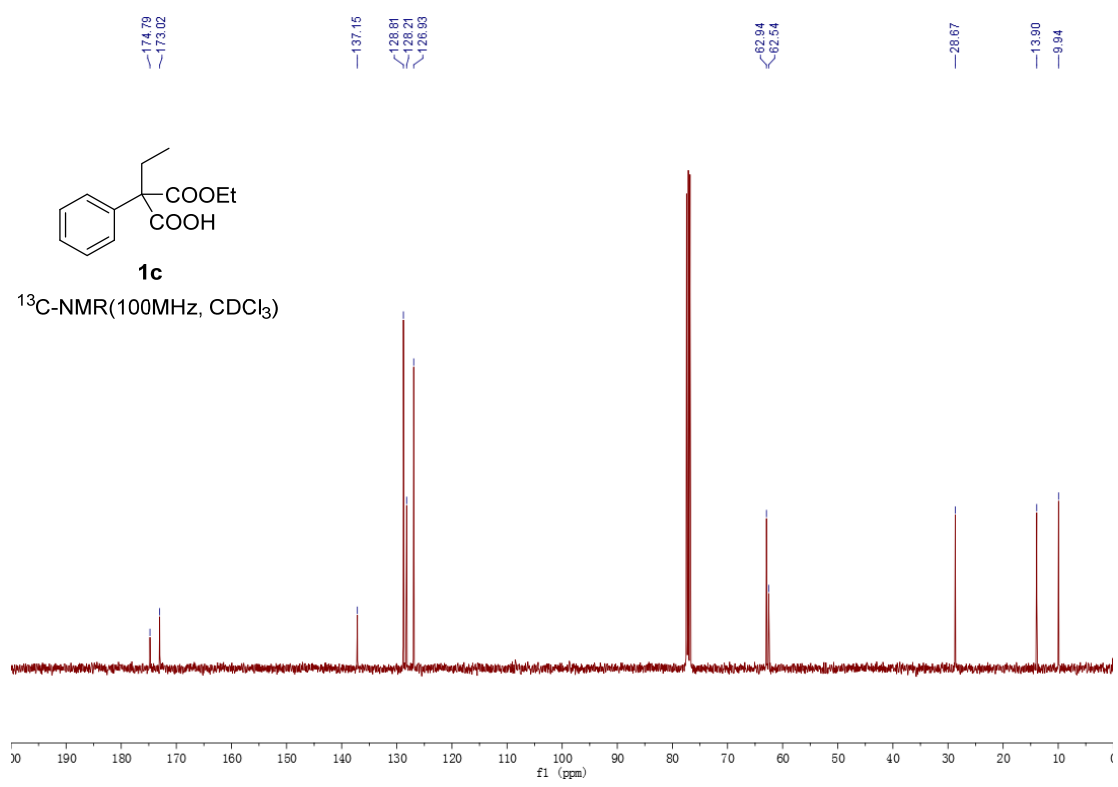



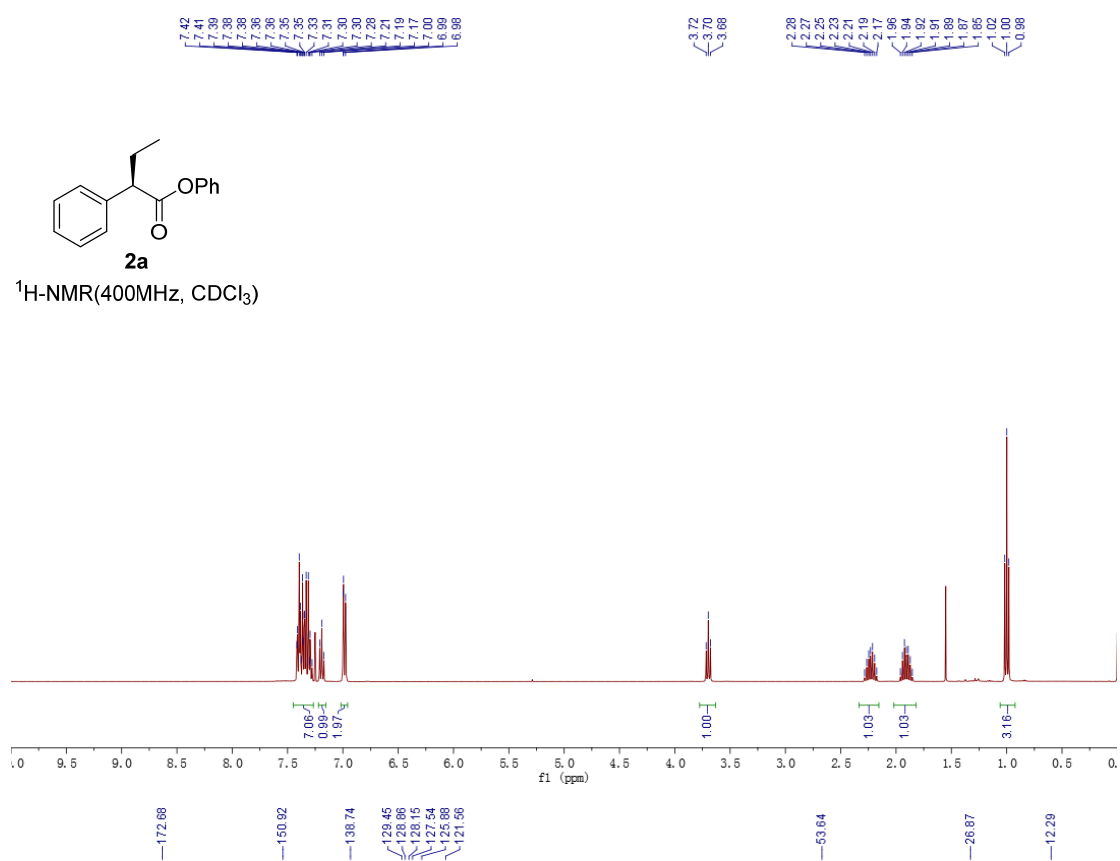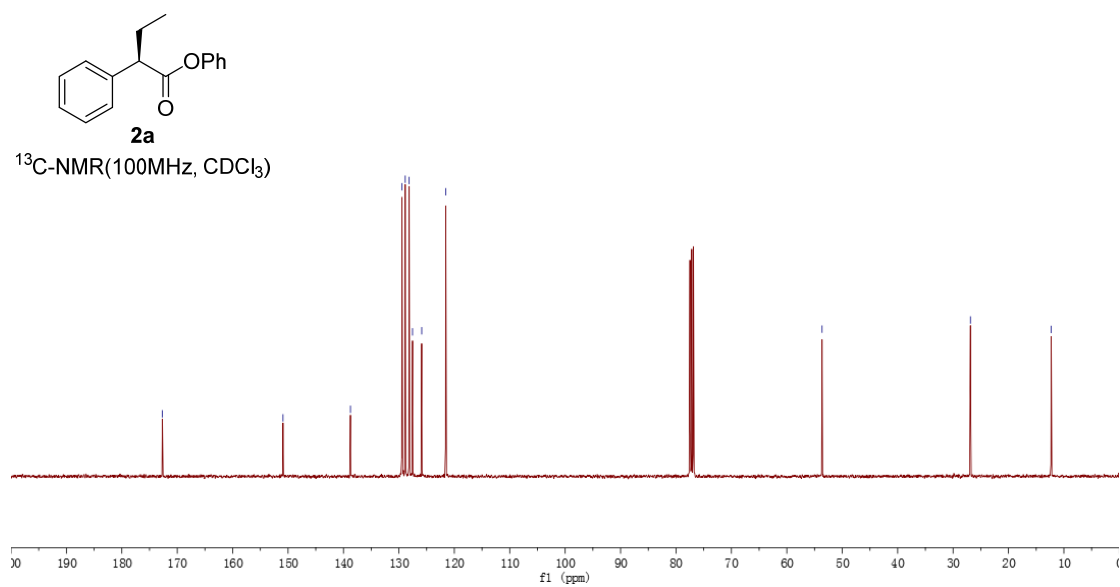

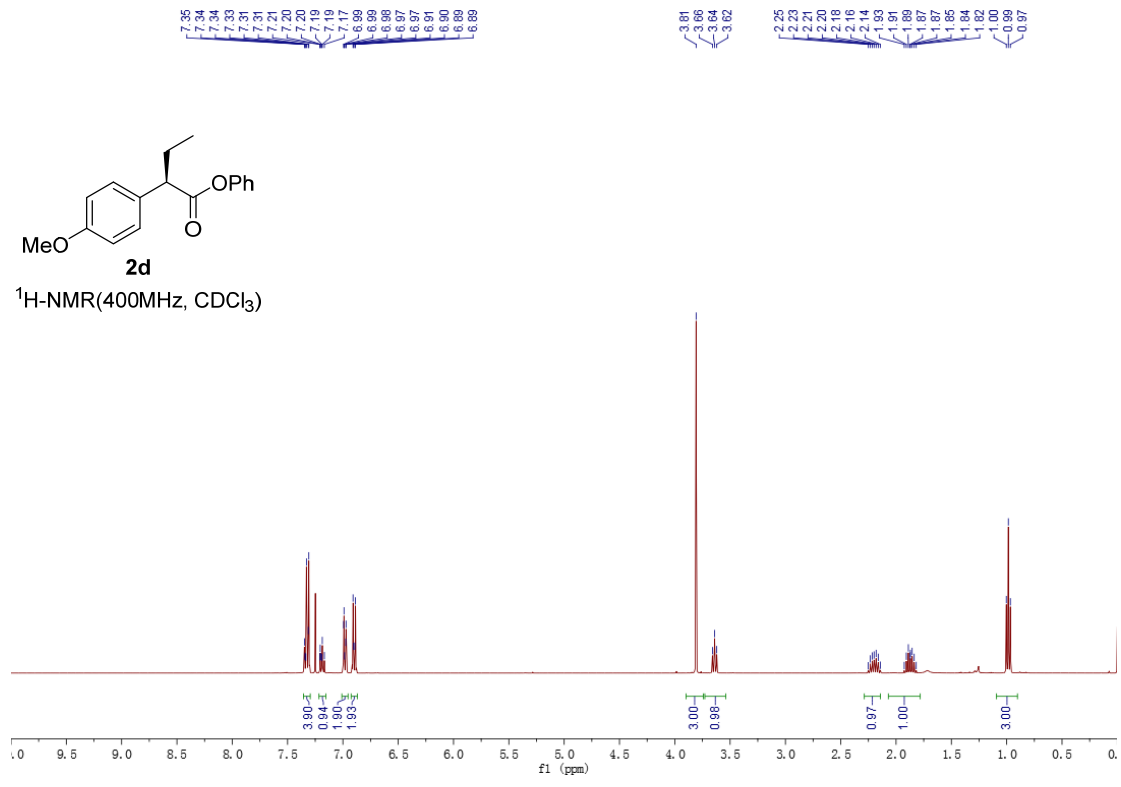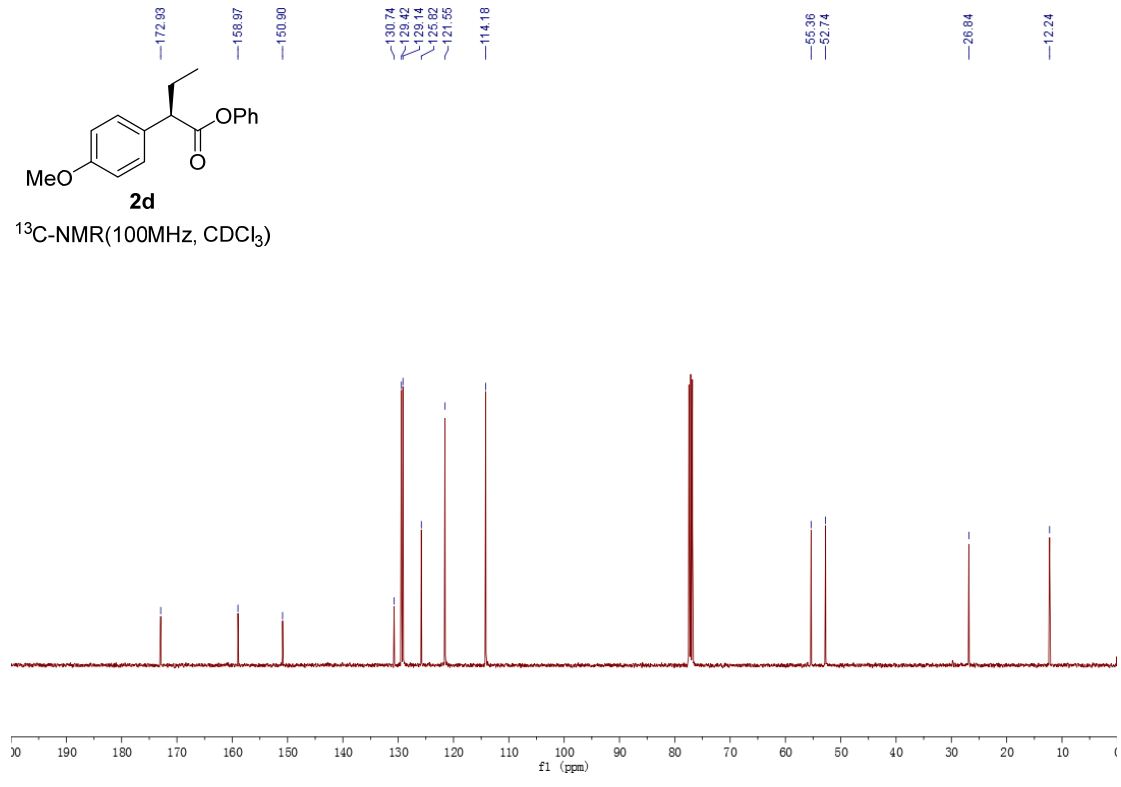

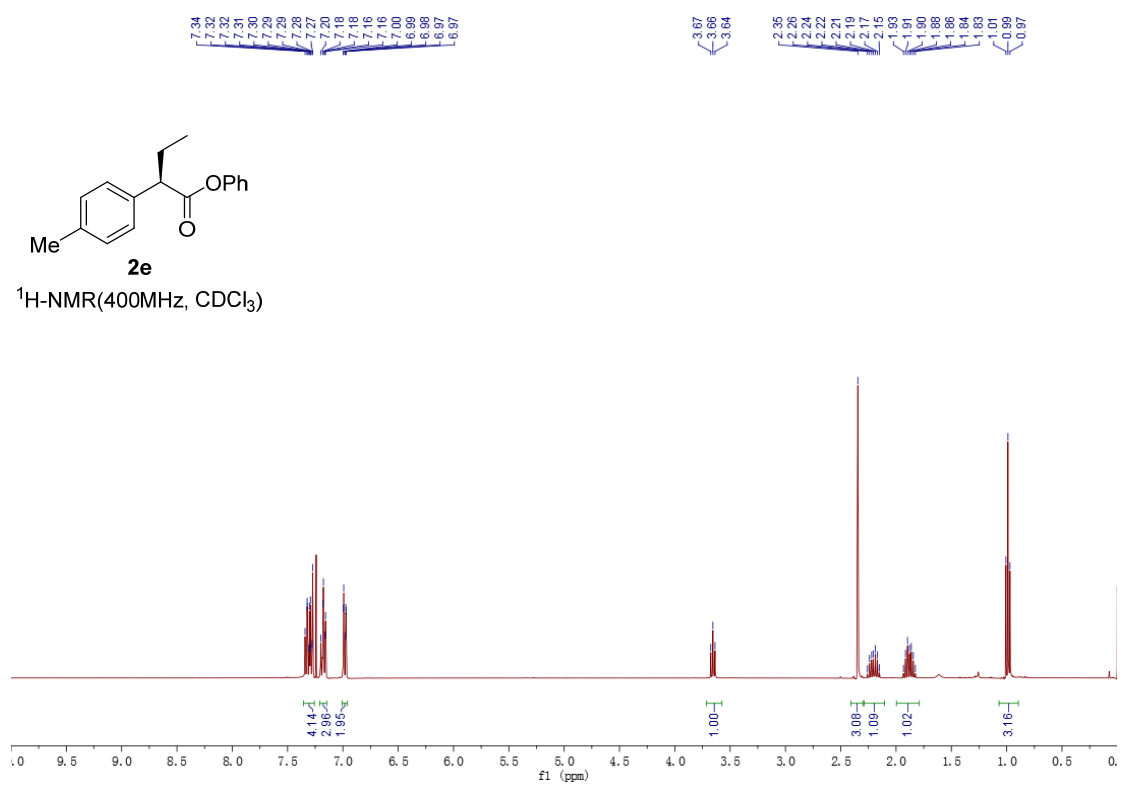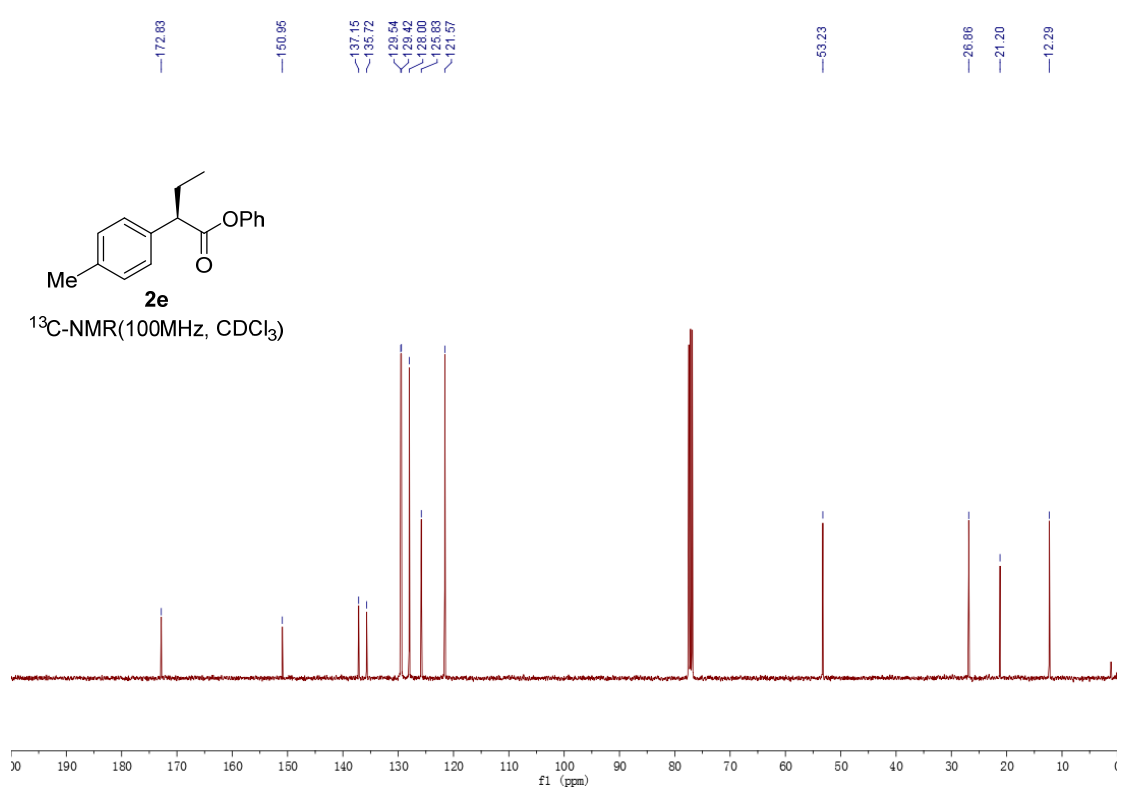

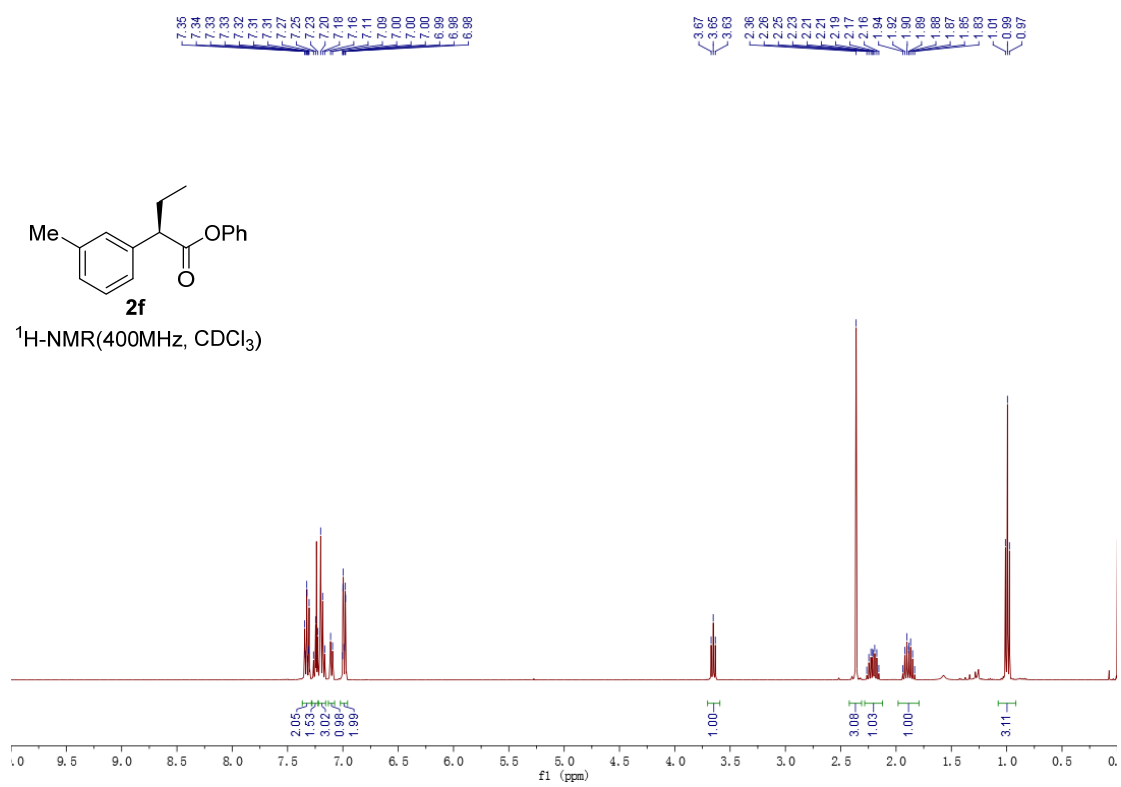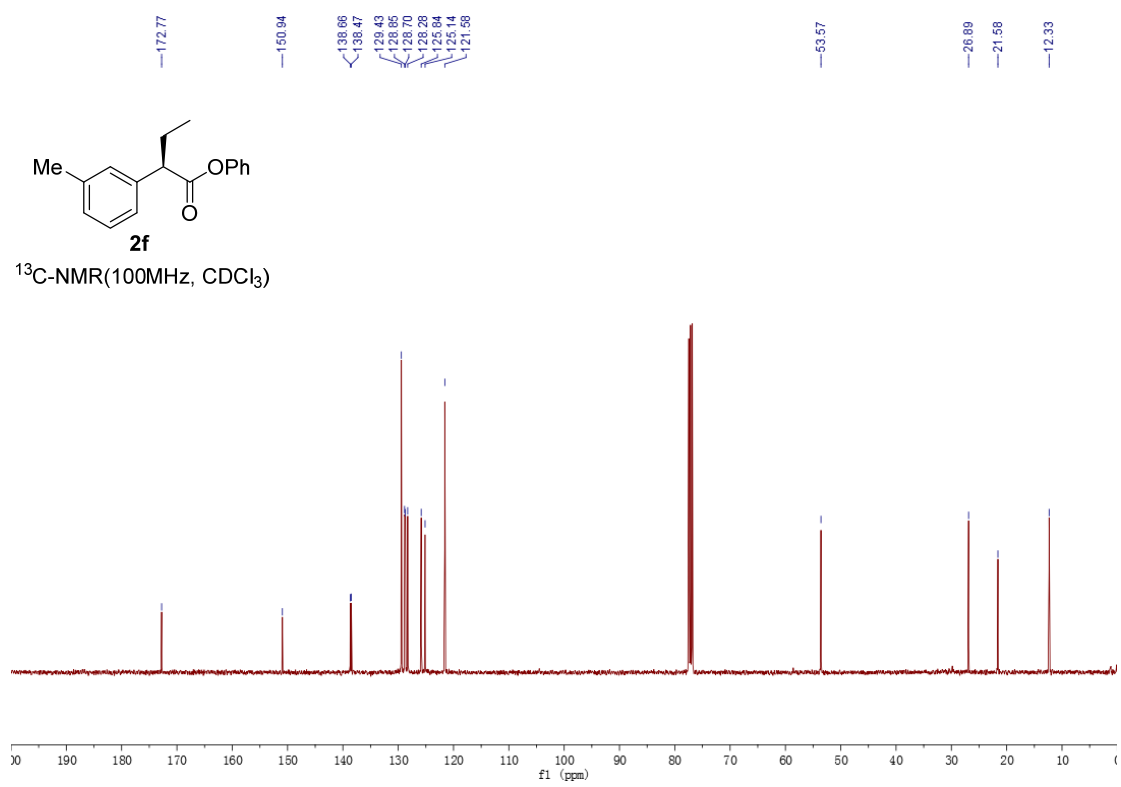

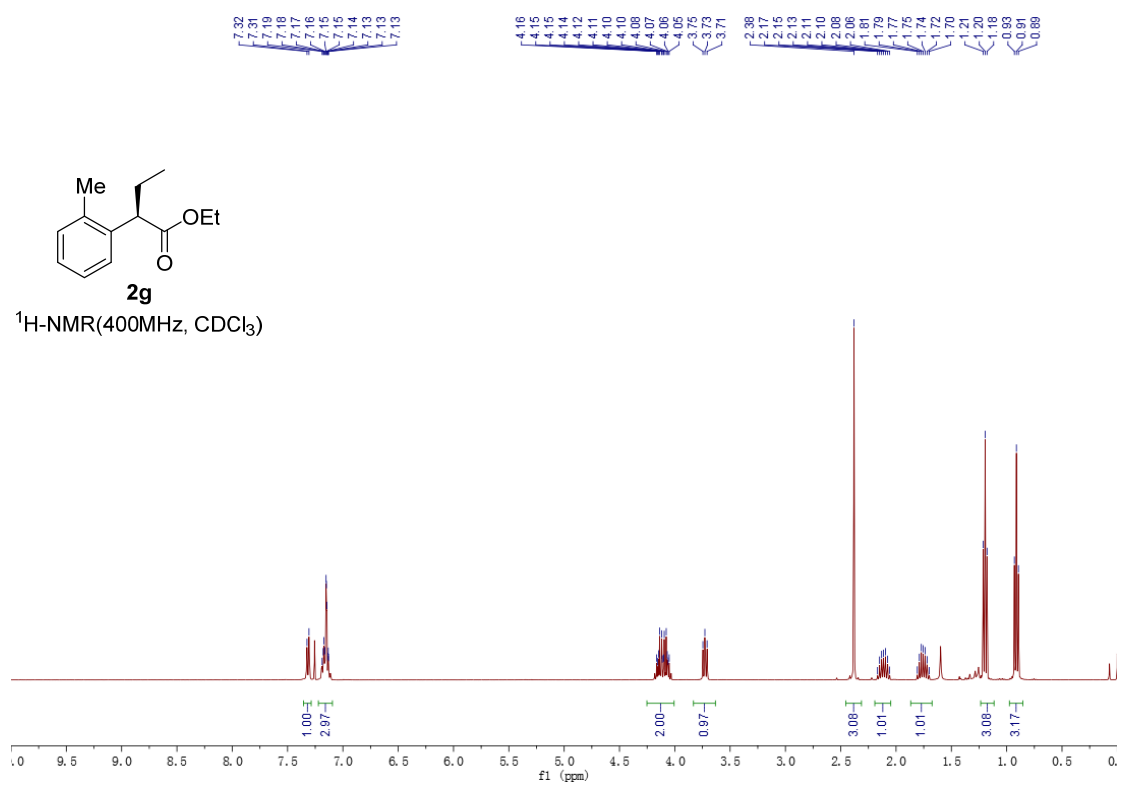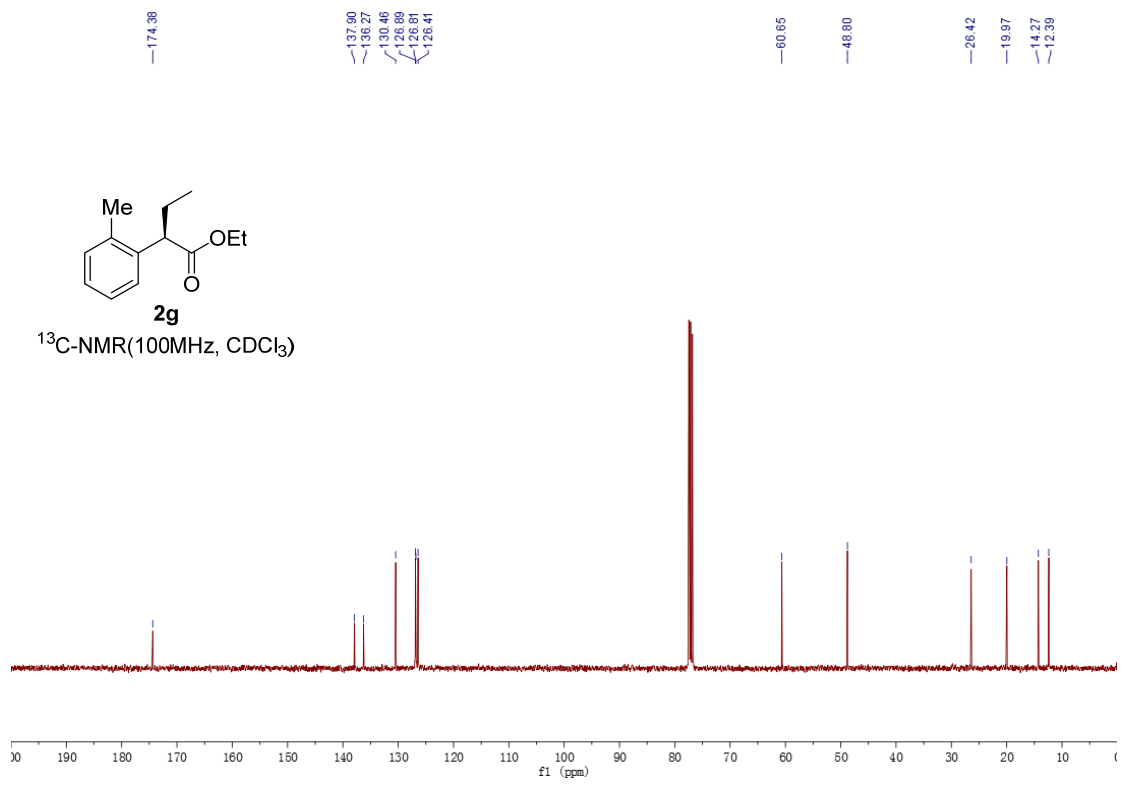

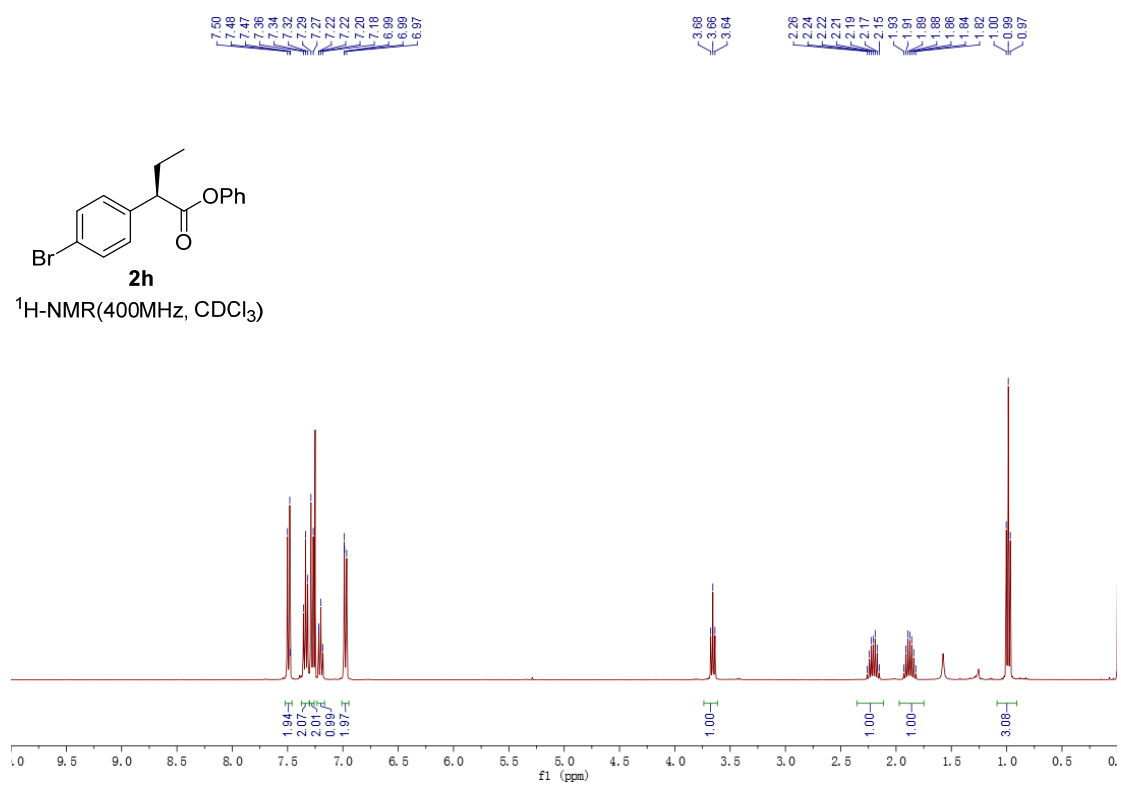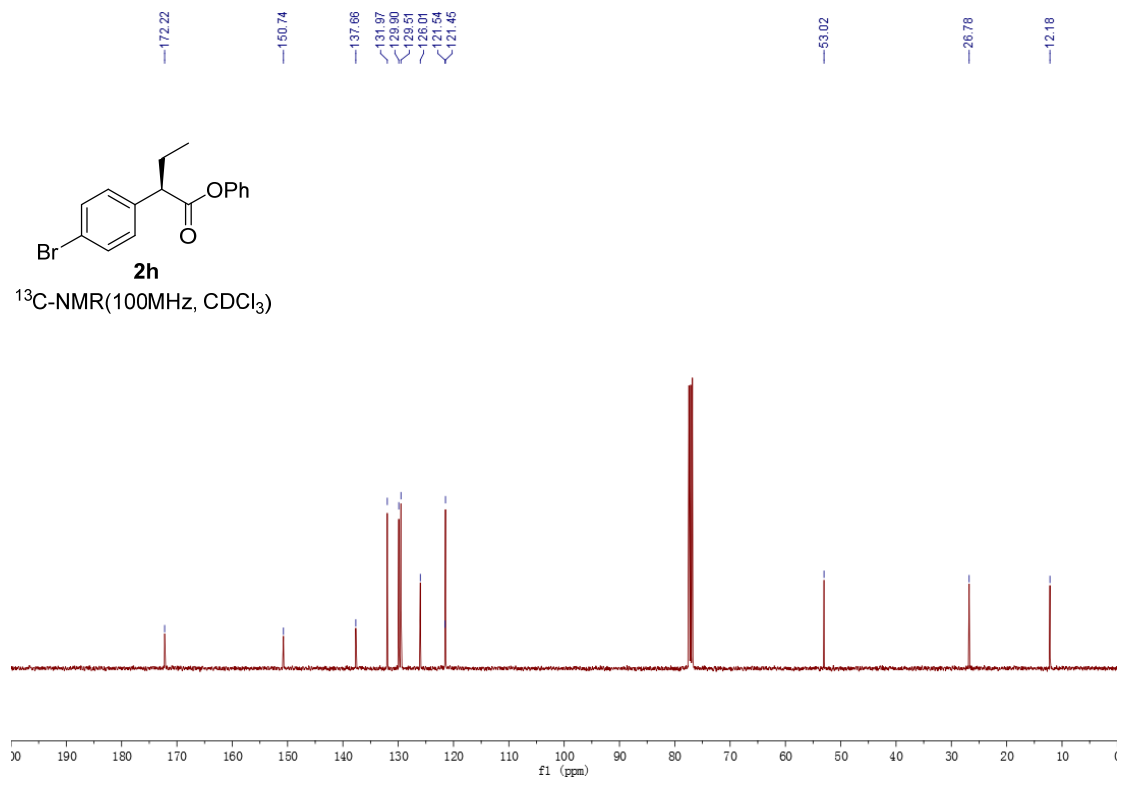

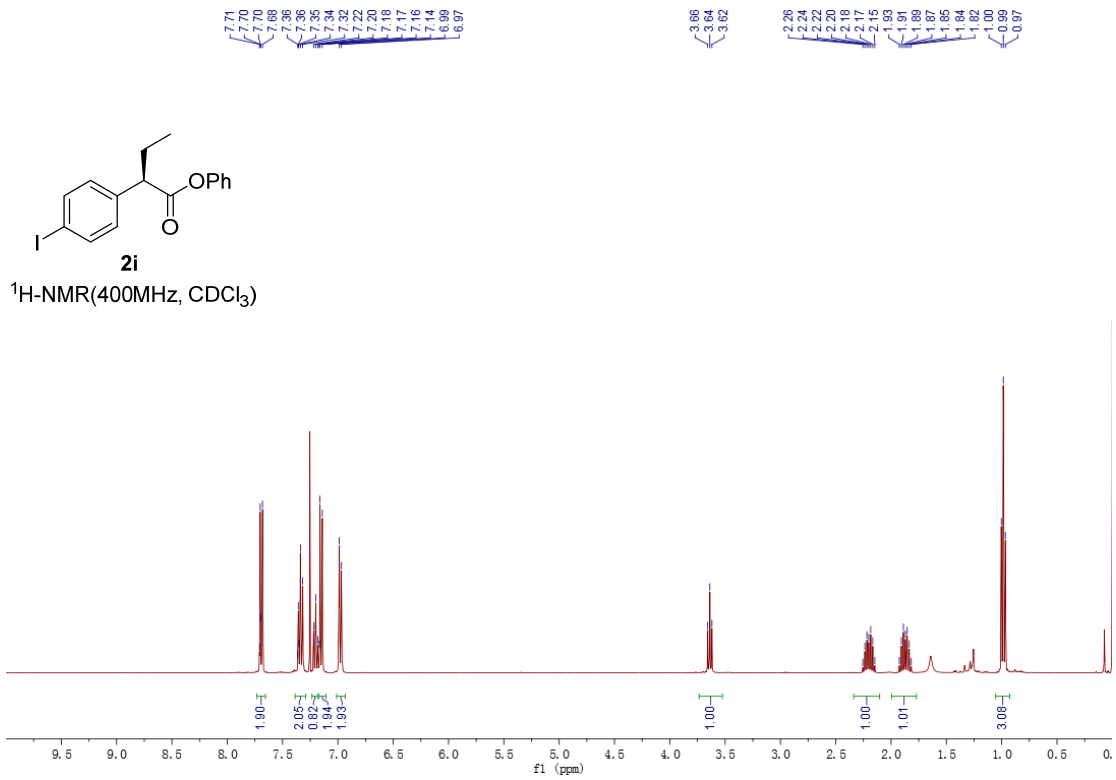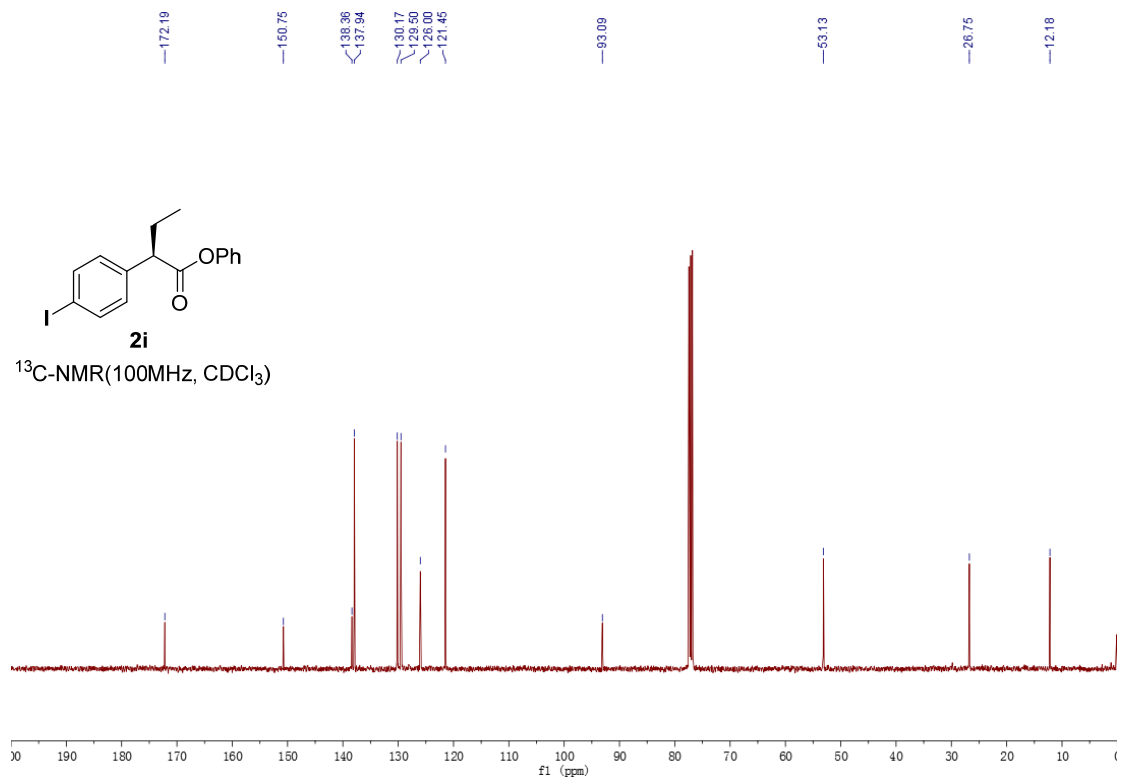

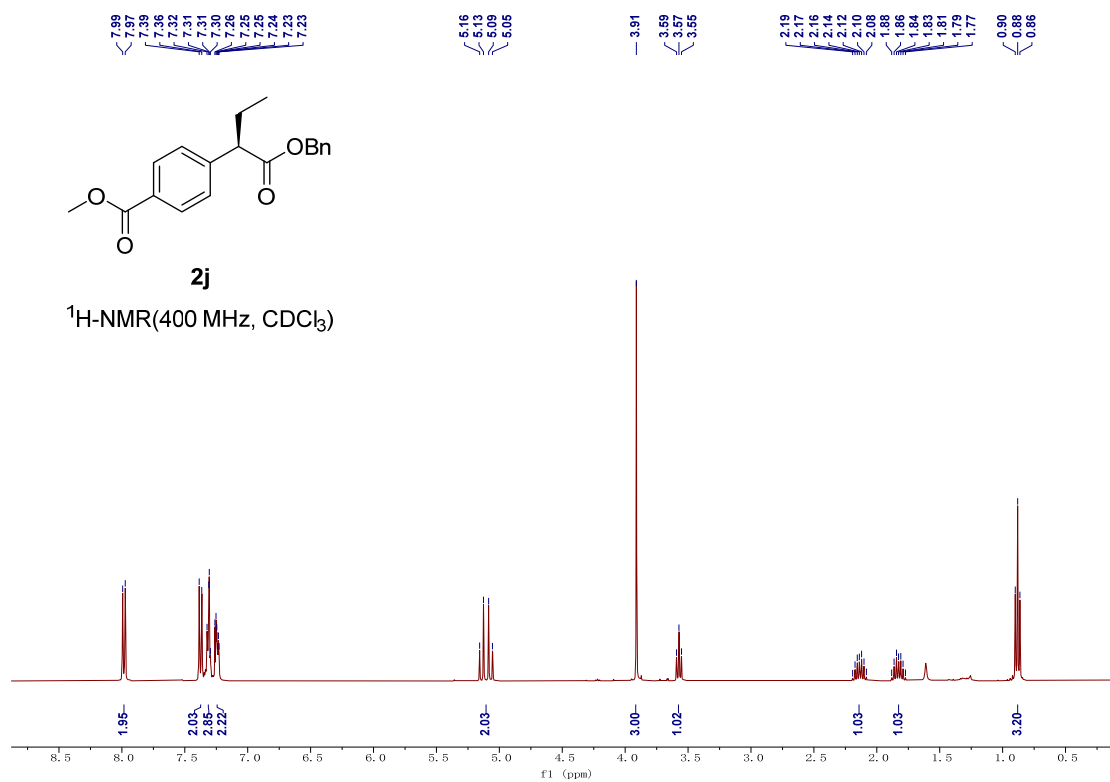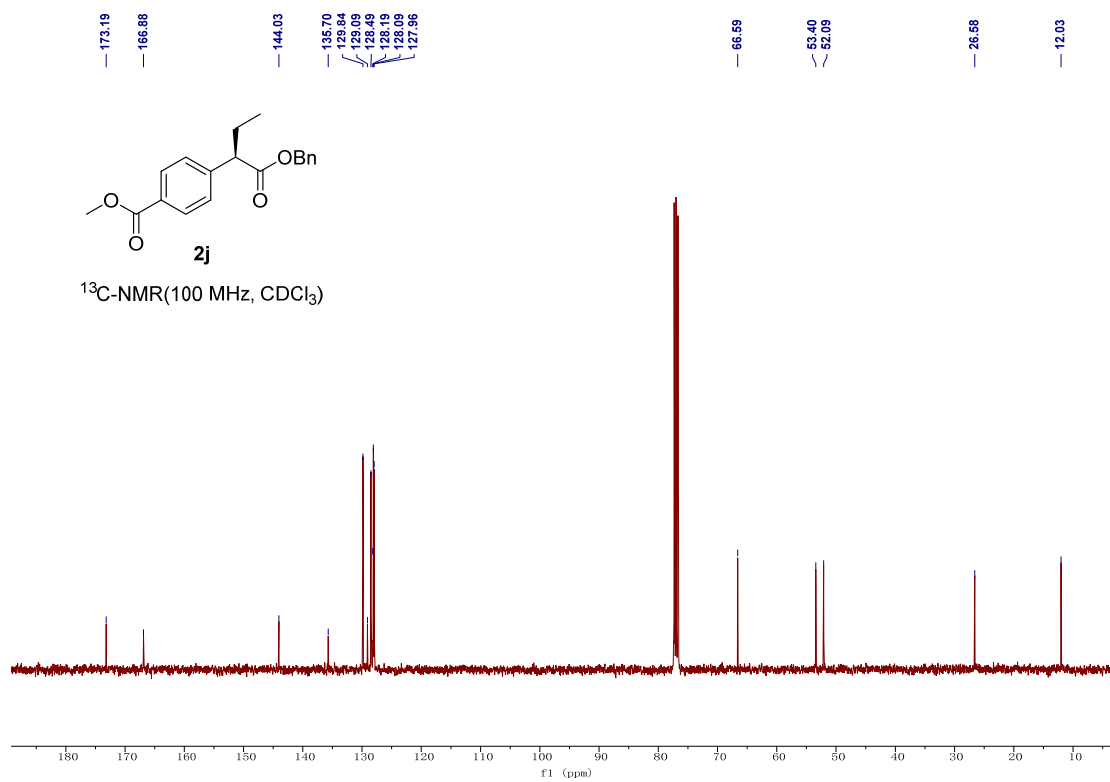



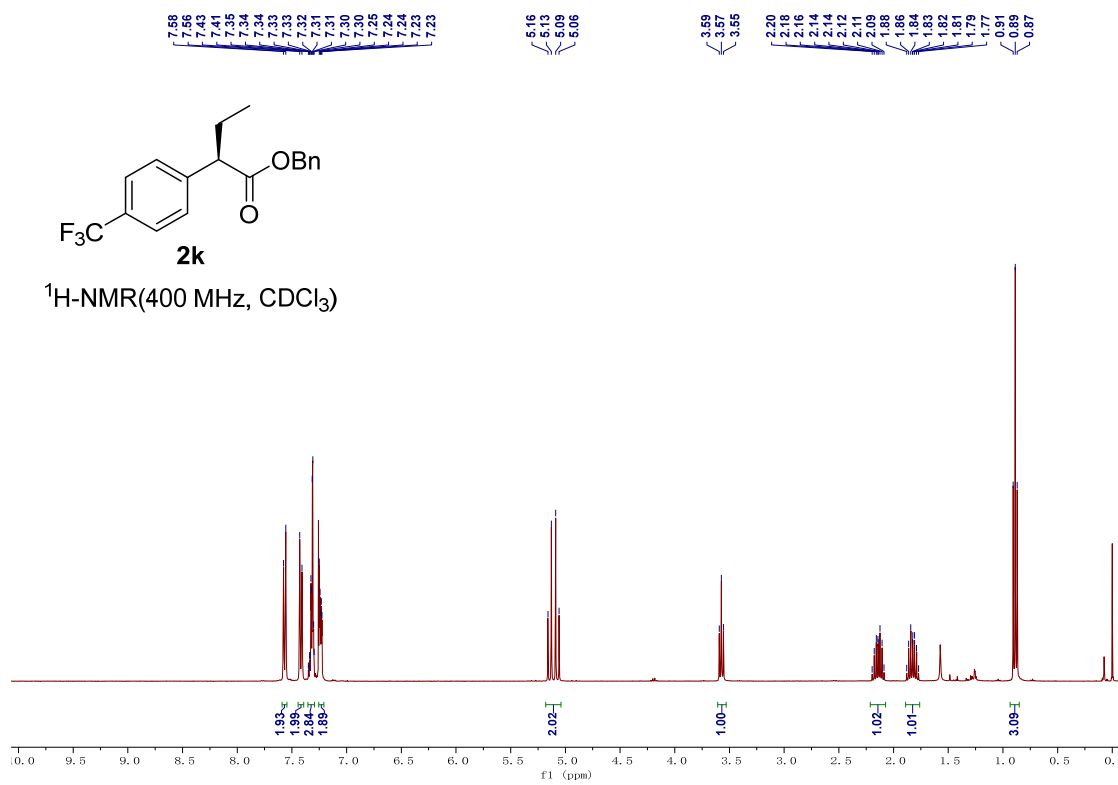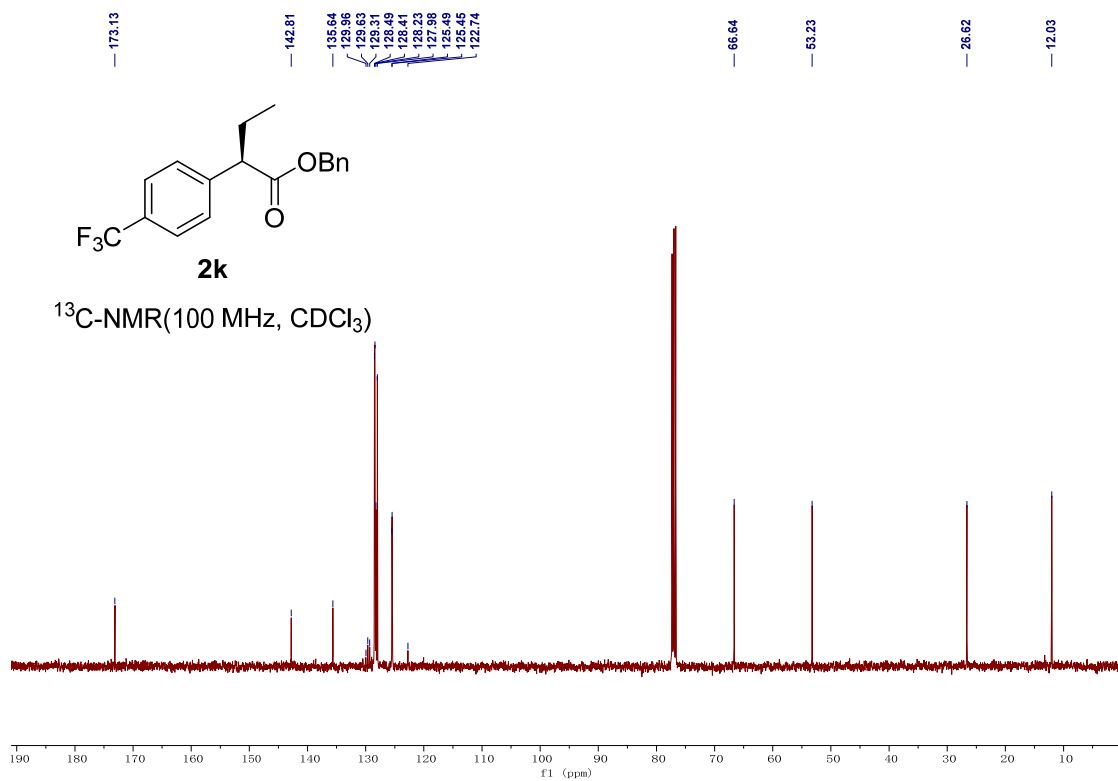

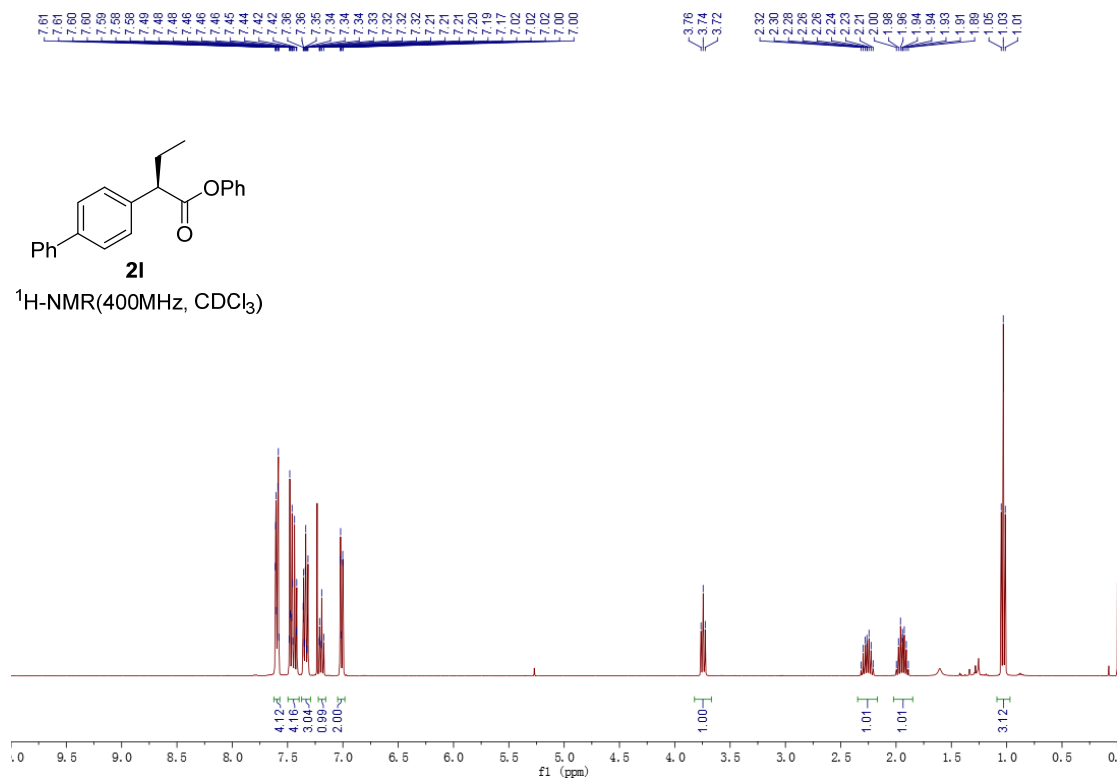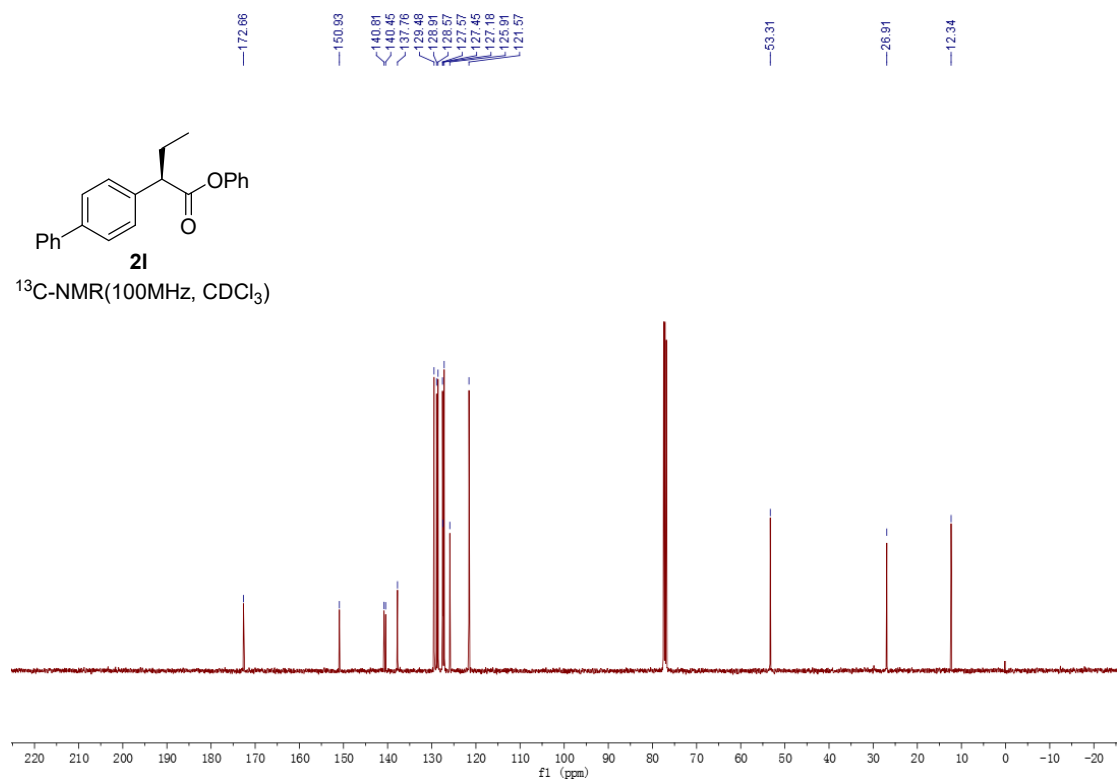

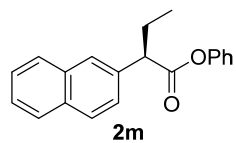

<sup>1</sup>H-NMR(400MHz, CDCl<sub>3</sub>)

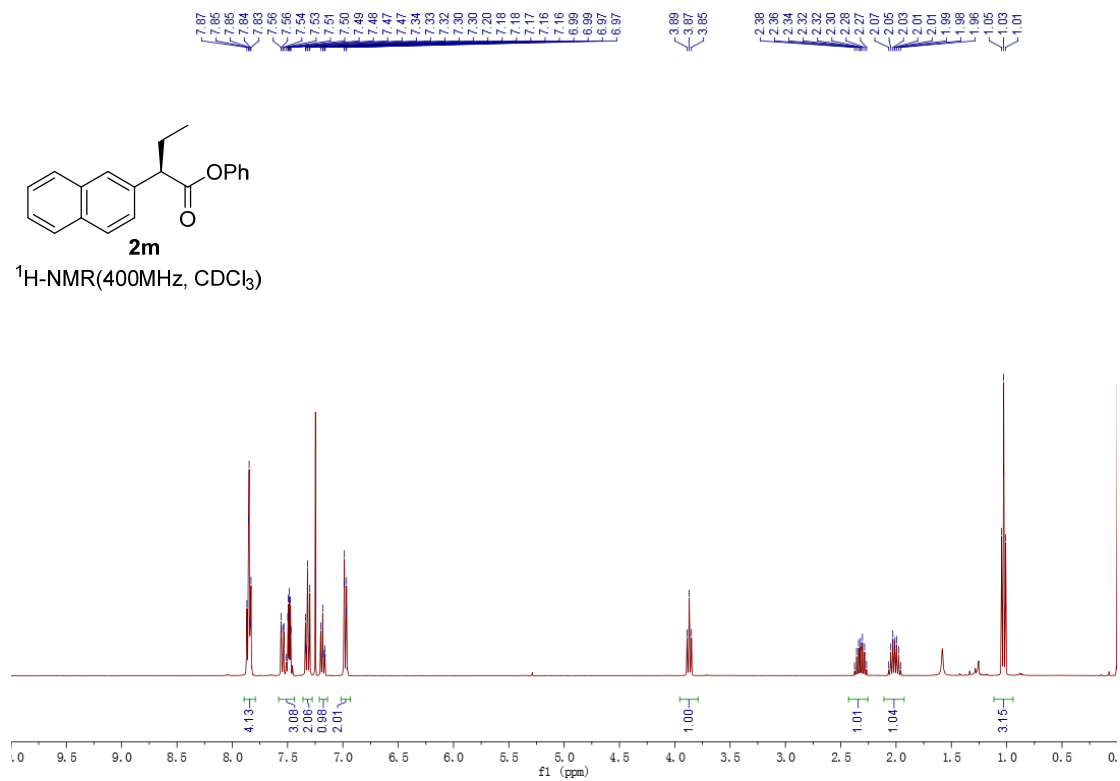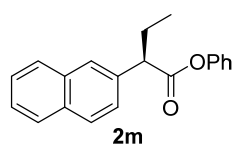

<sup>13</sup>C-NMR(100MHz, CDCl<sub>3</sub>)

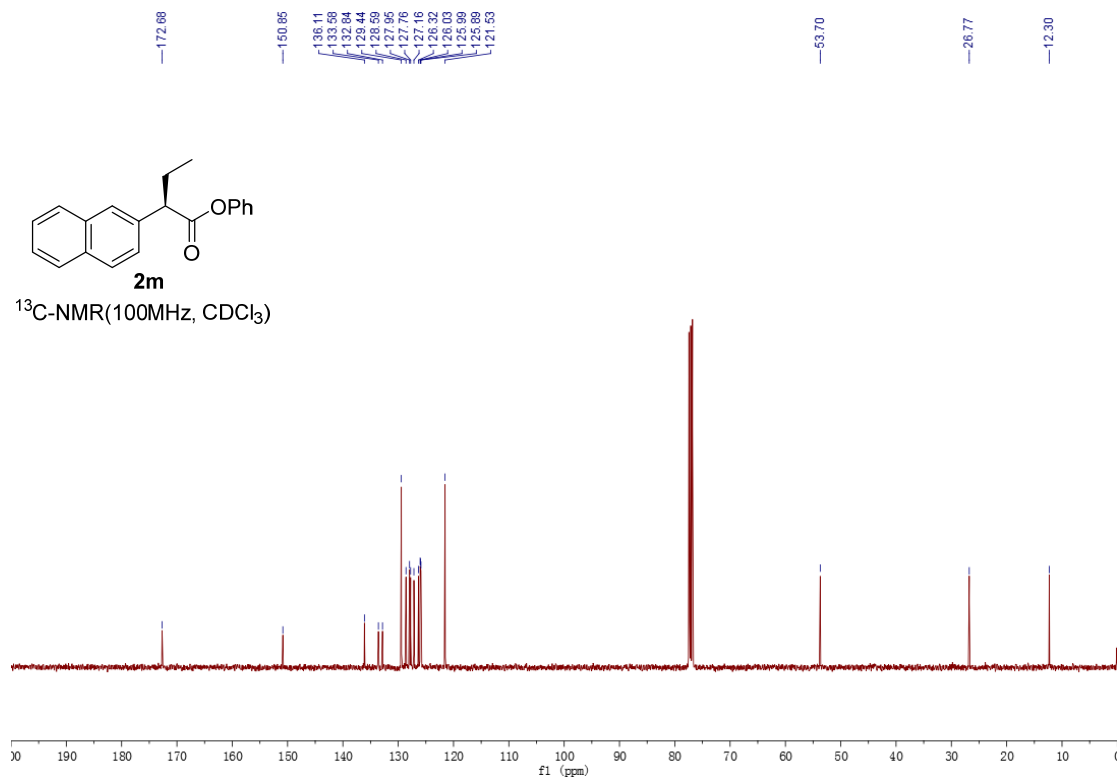

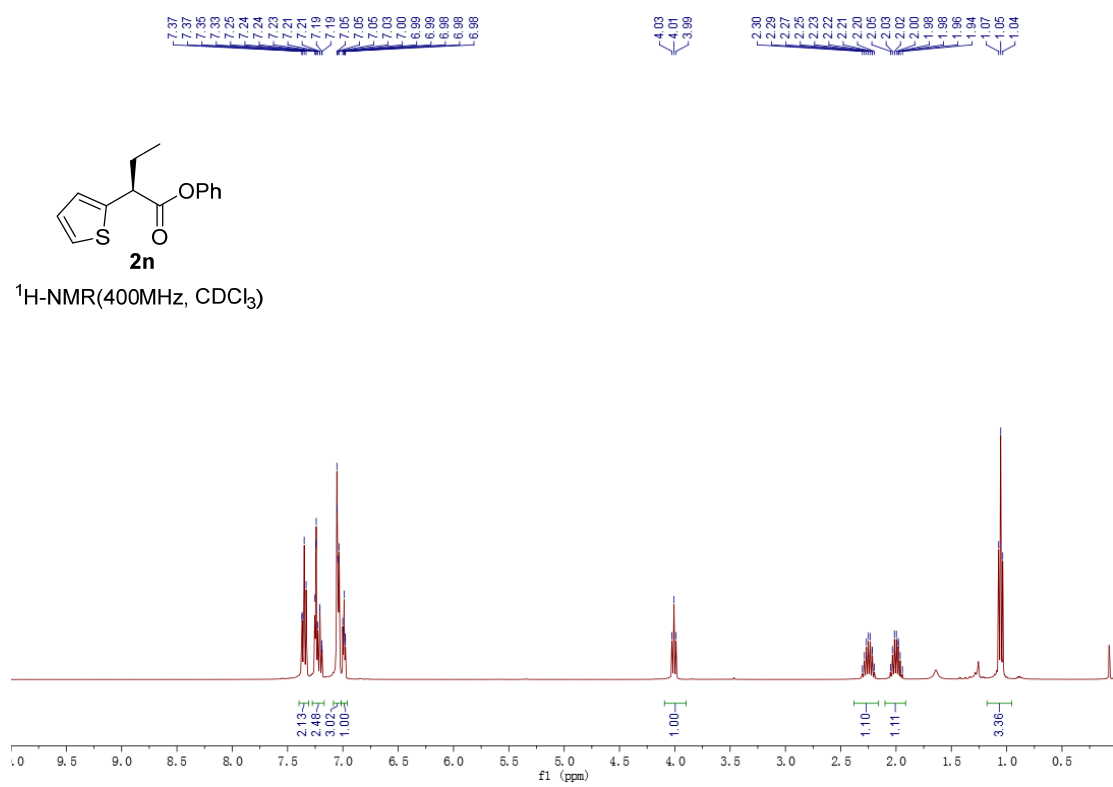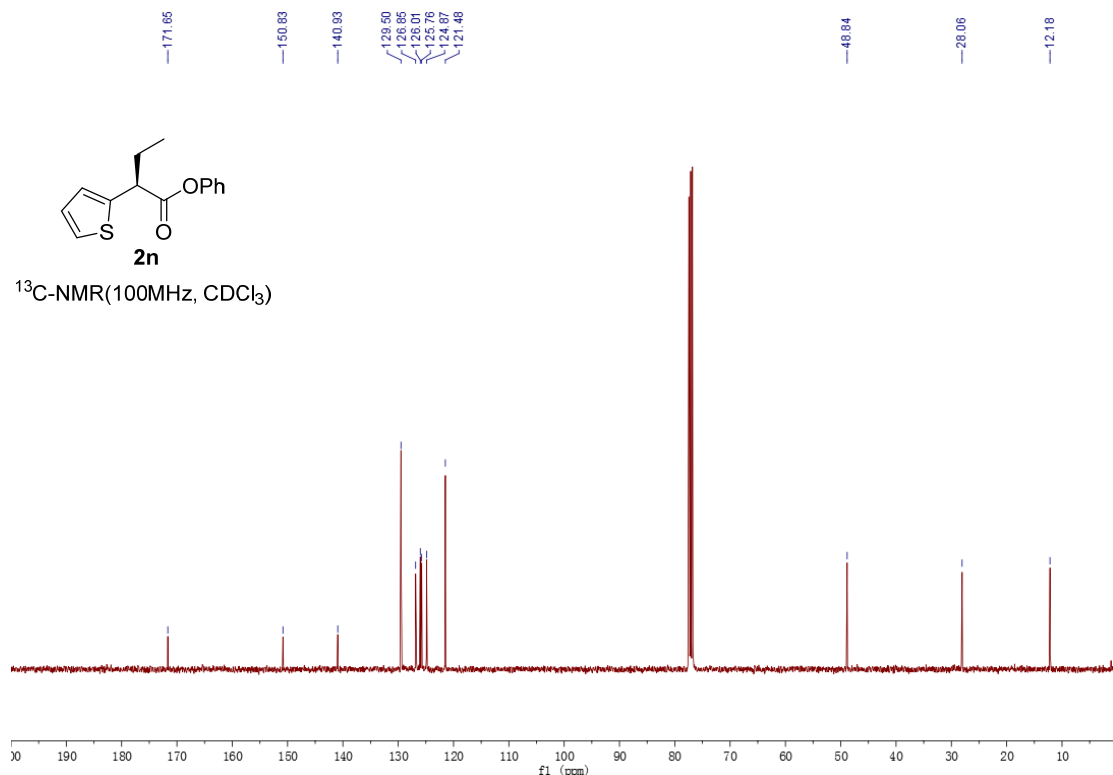

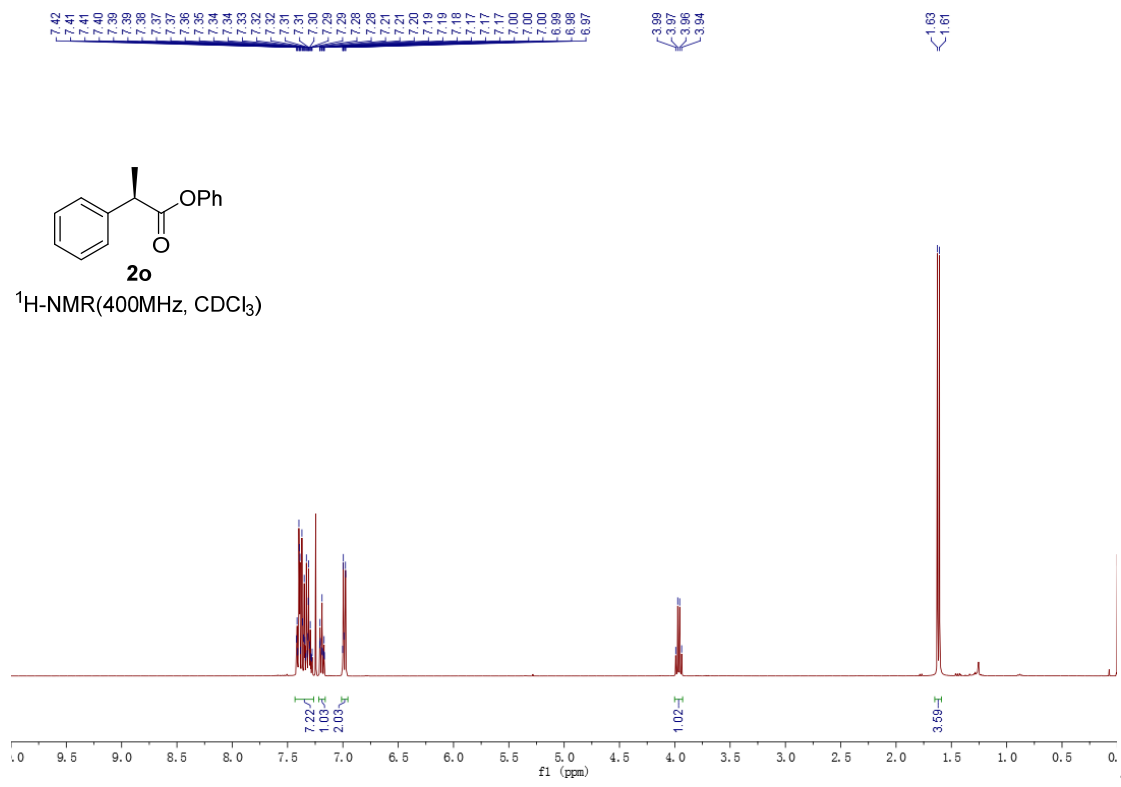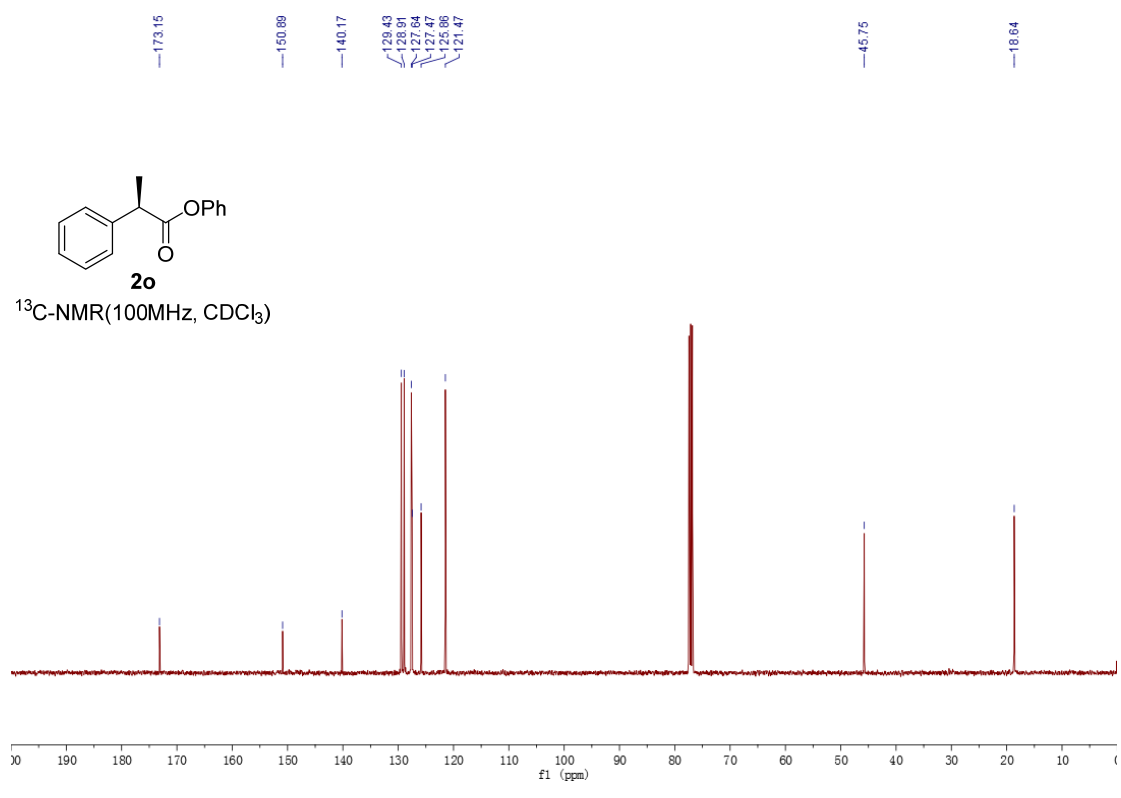

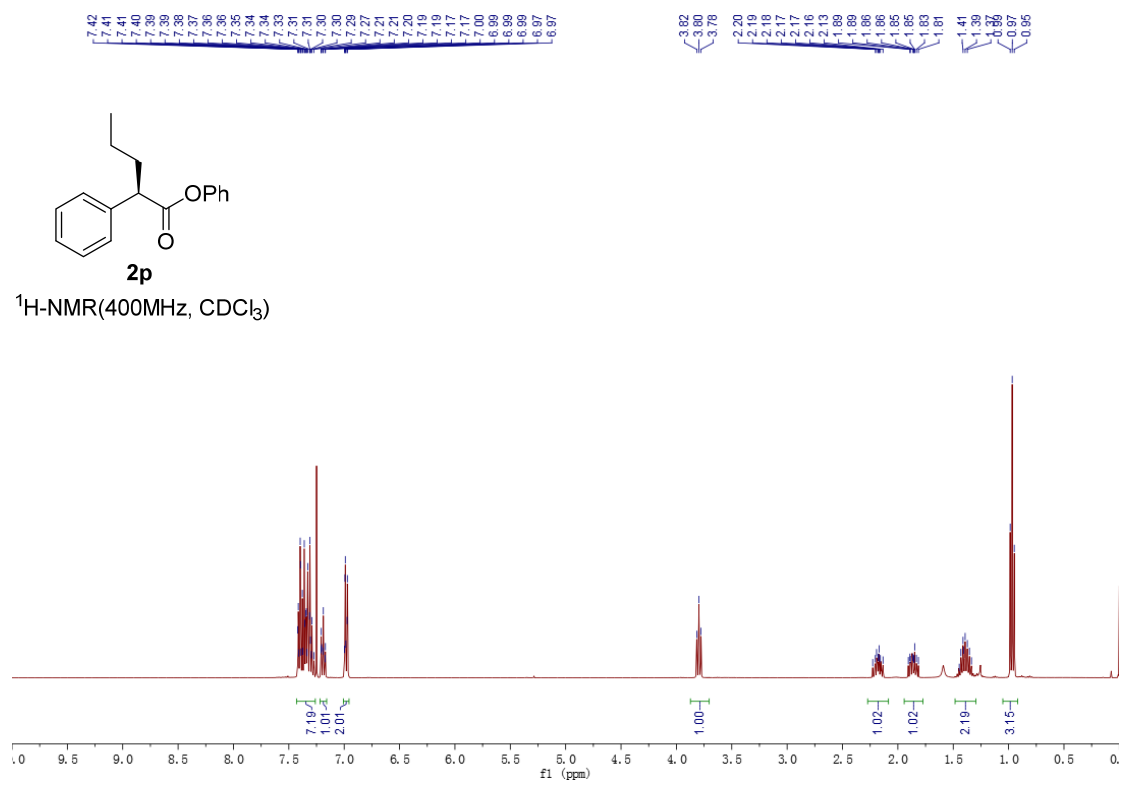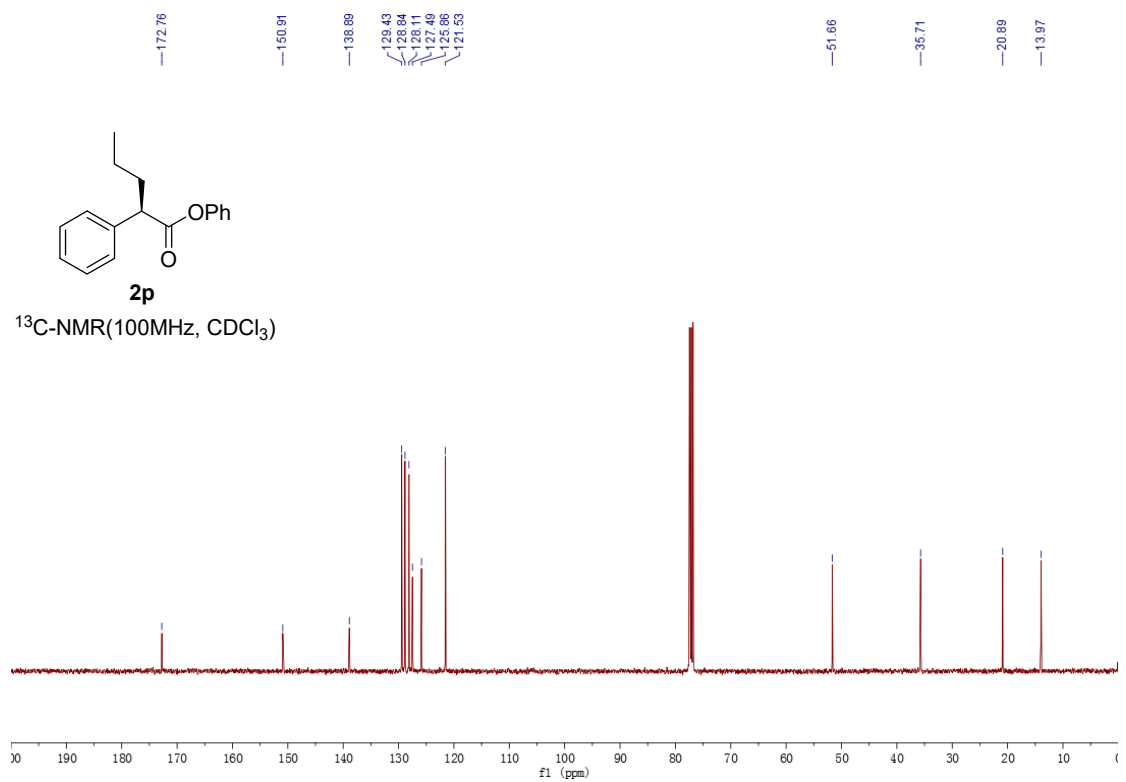

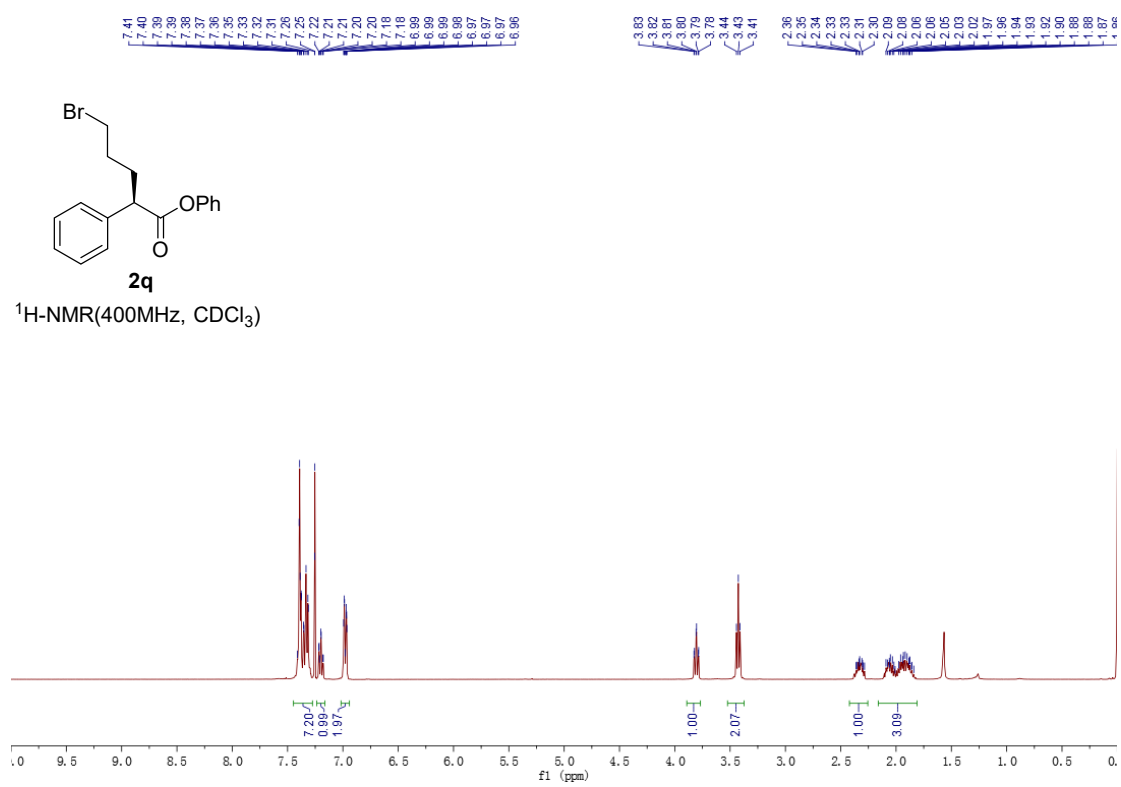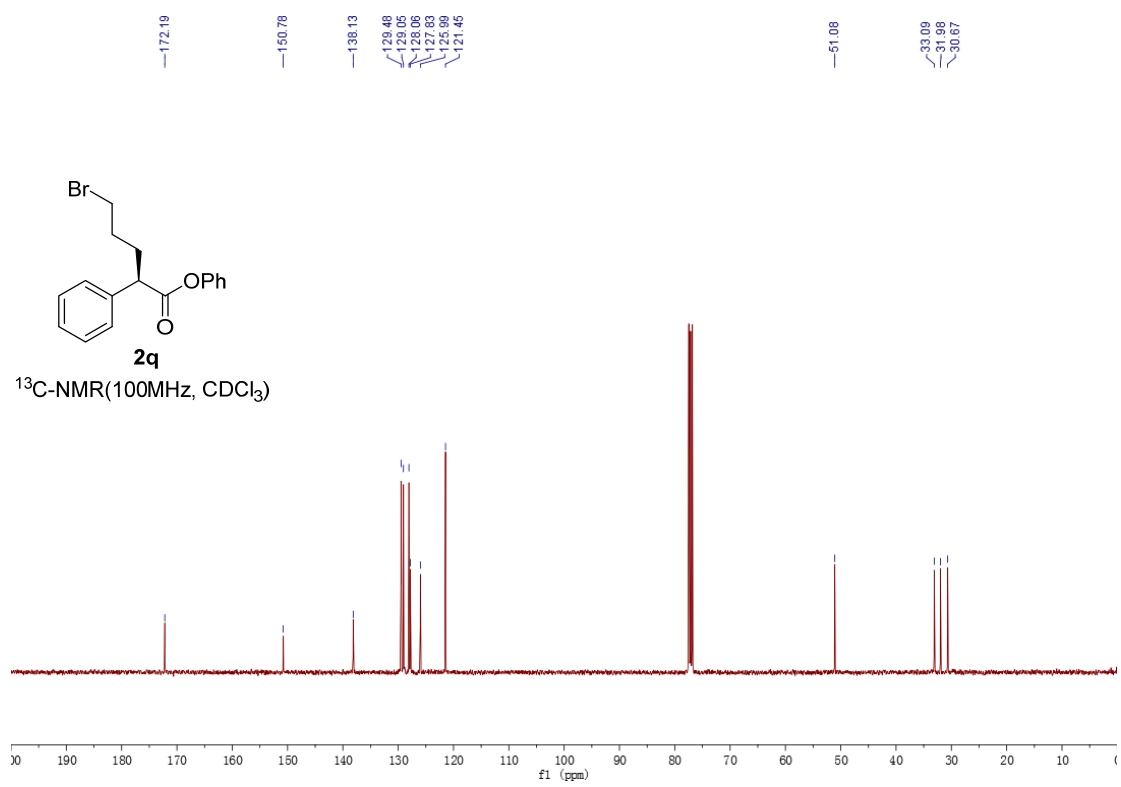

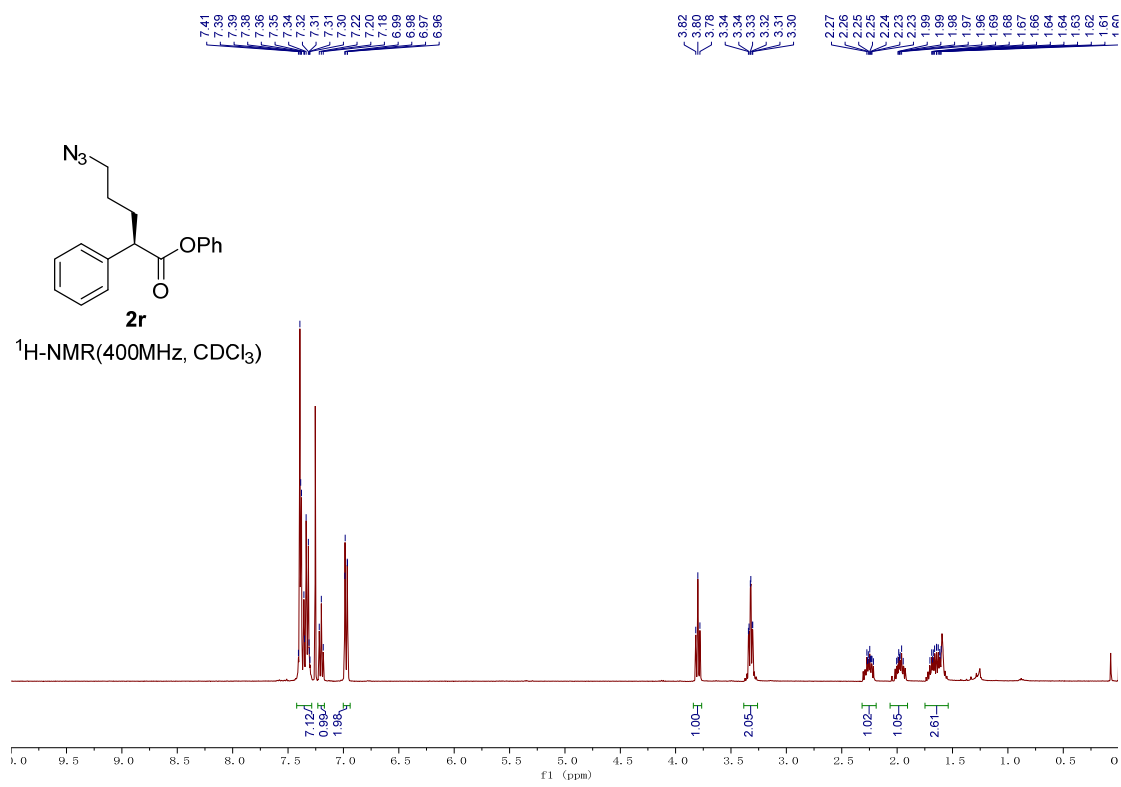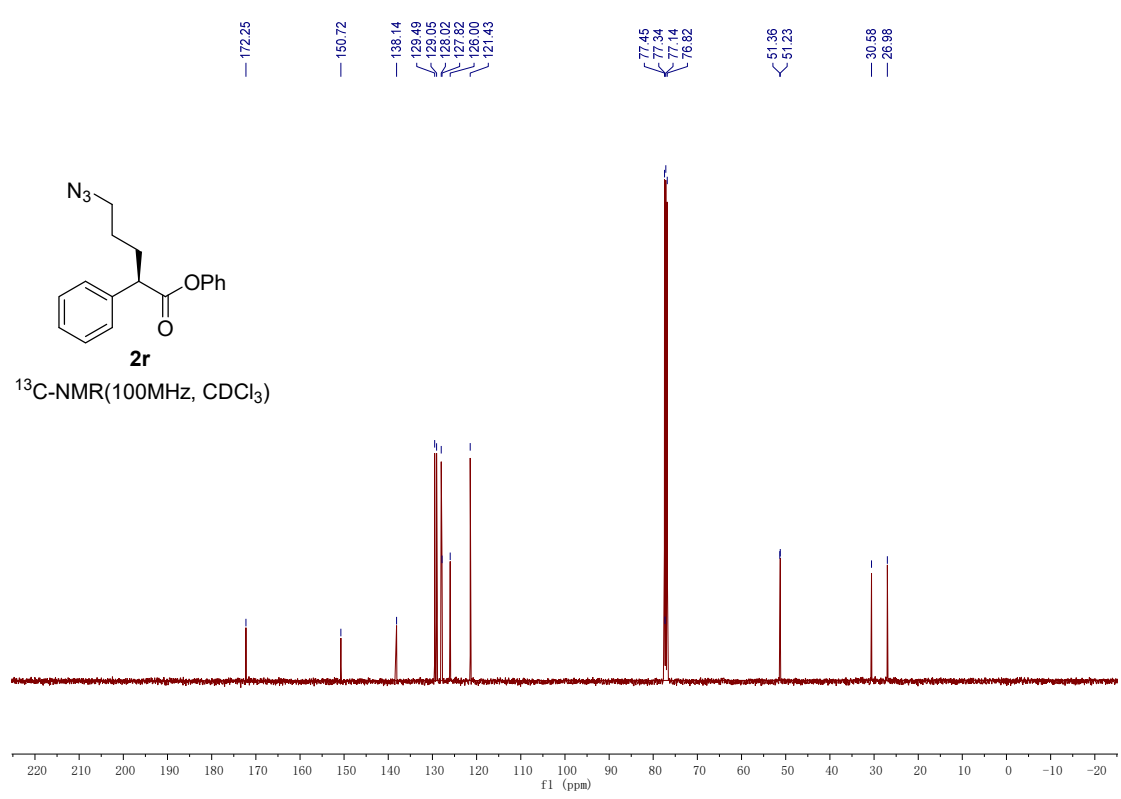



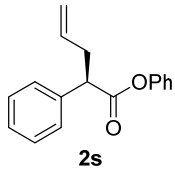

$^1\text{H-NMR}$ (400MHz,  $\text{CDCl}_3$ )

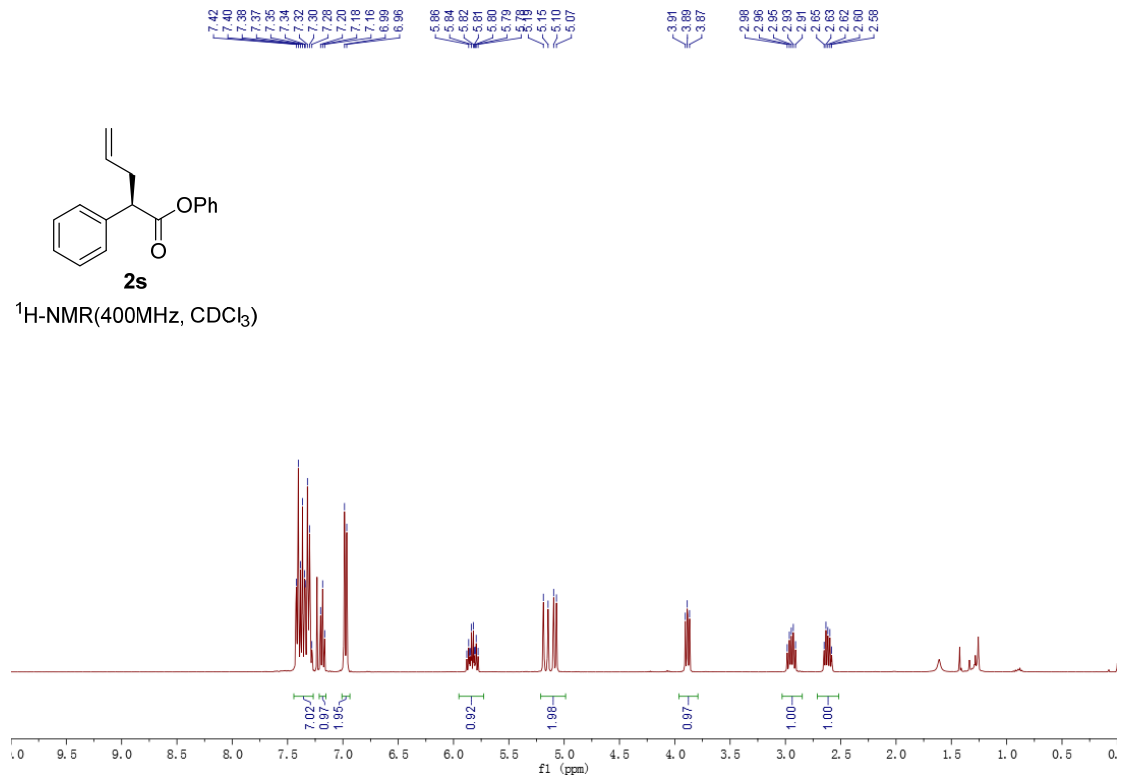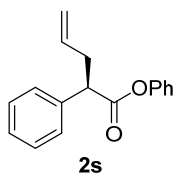

$^{13}\text{C-NMR}$ (100MHz,  $\text{CDCl}_3$ )

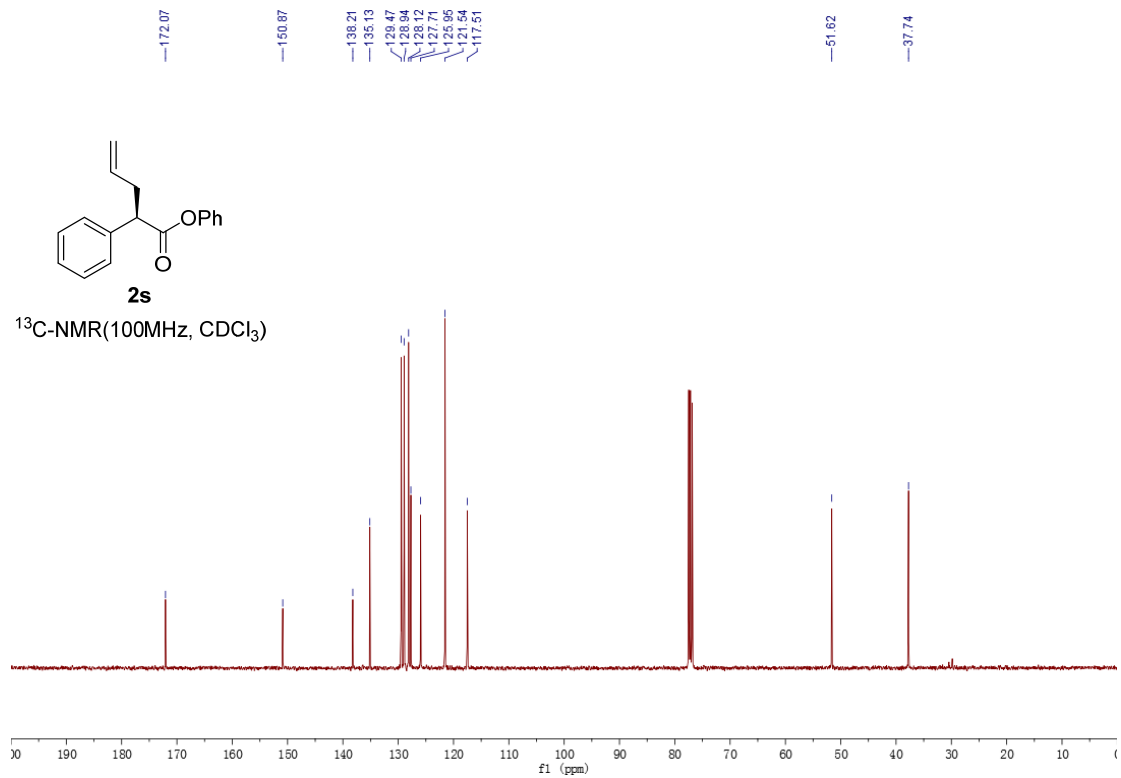

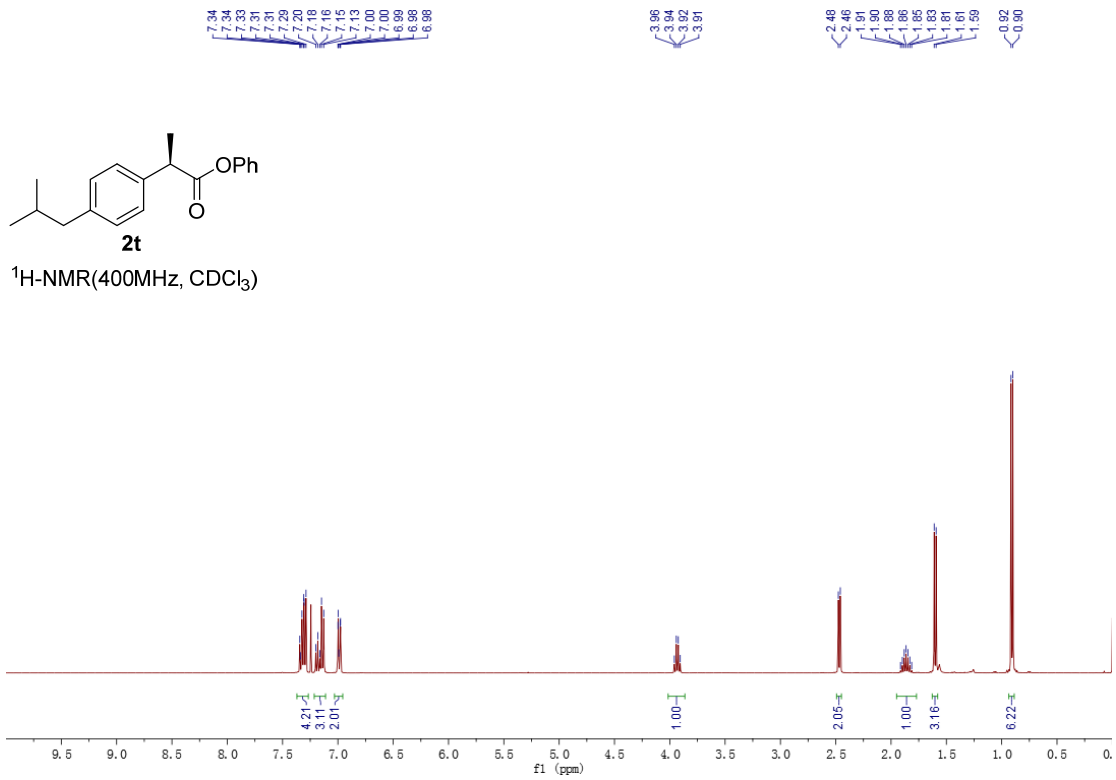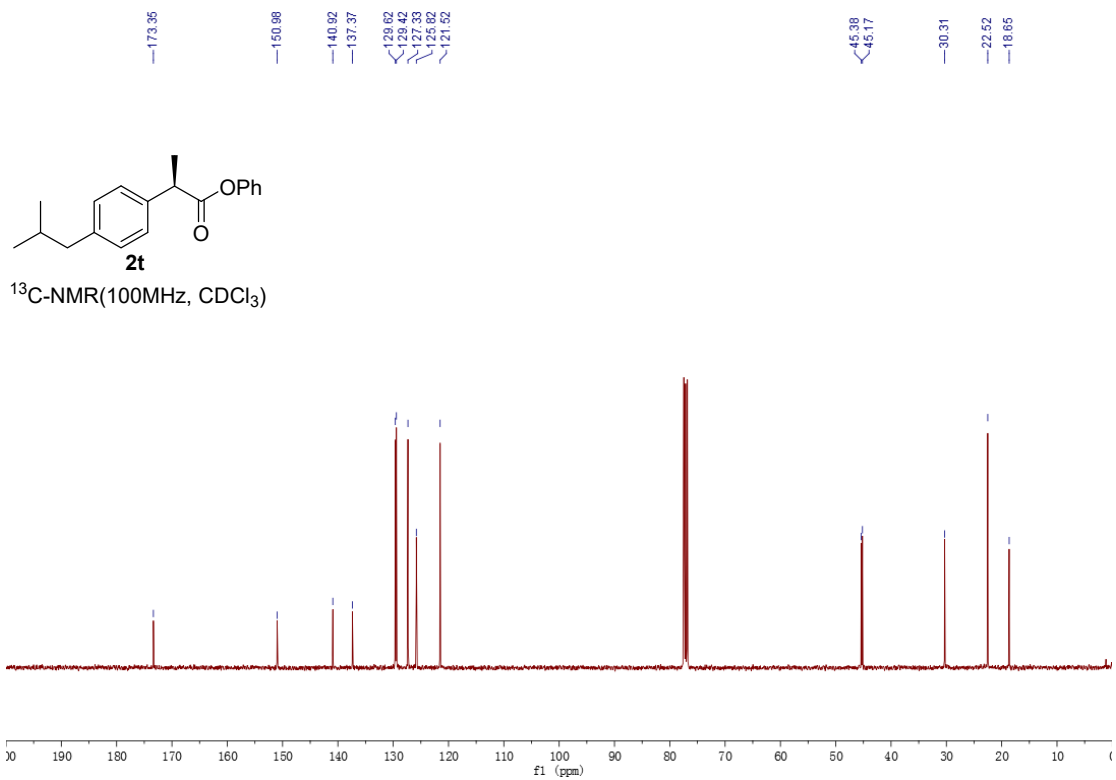

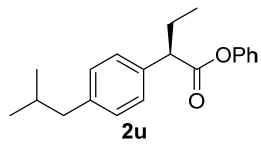

<sup>1</sup>H-NMR(400MHz, CDCl<sub>3</sub>)

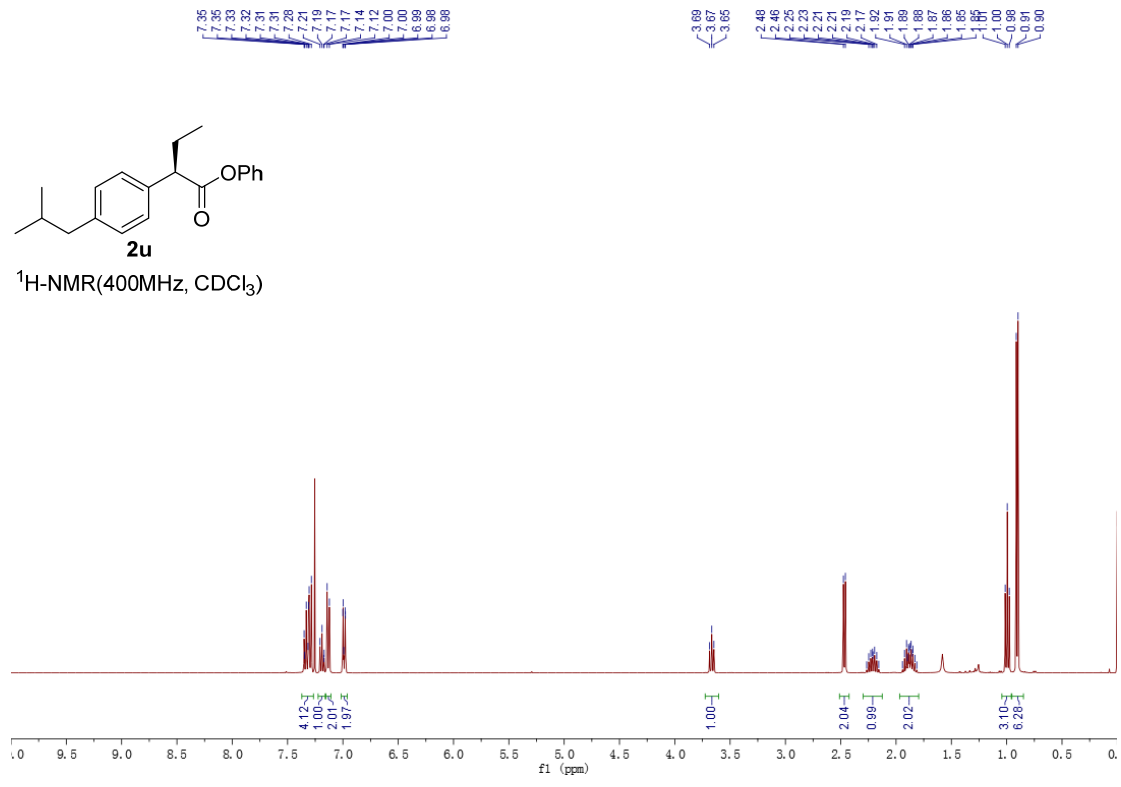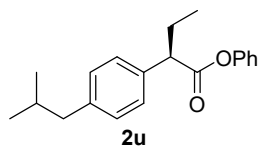

<sup>13</sup>C-NMR(100MHz, CDCl<sub>3</sub>)

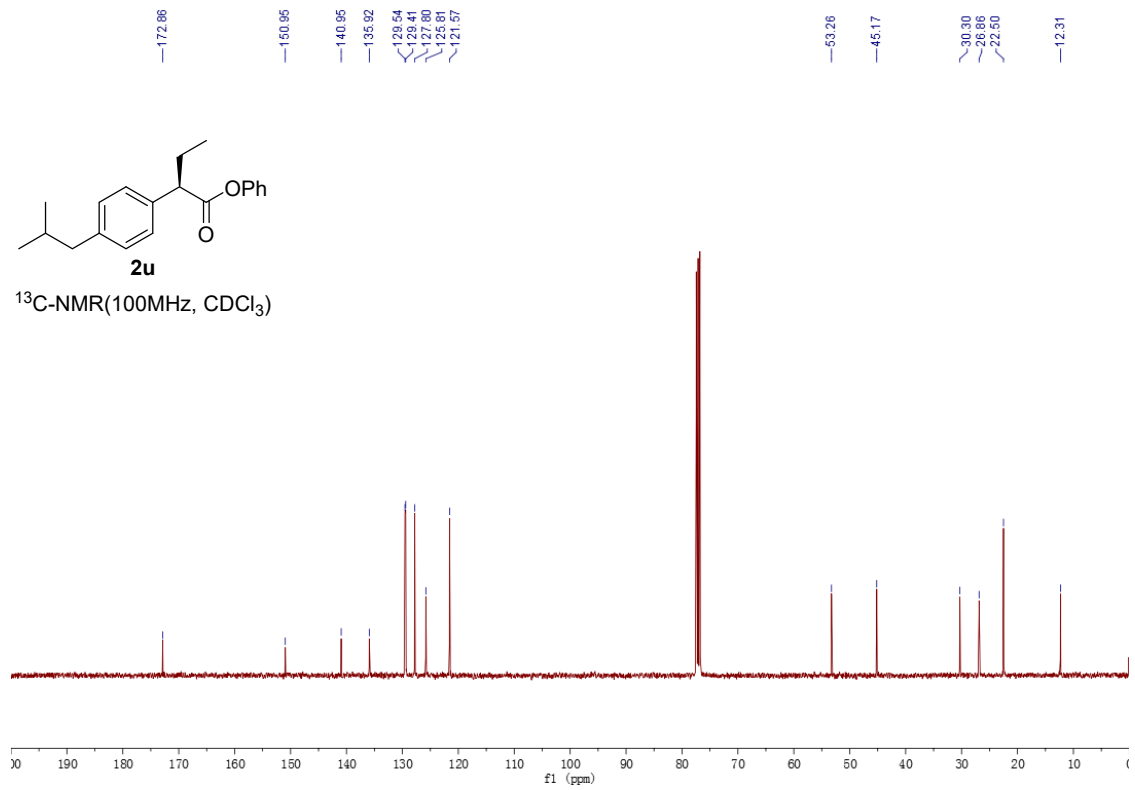

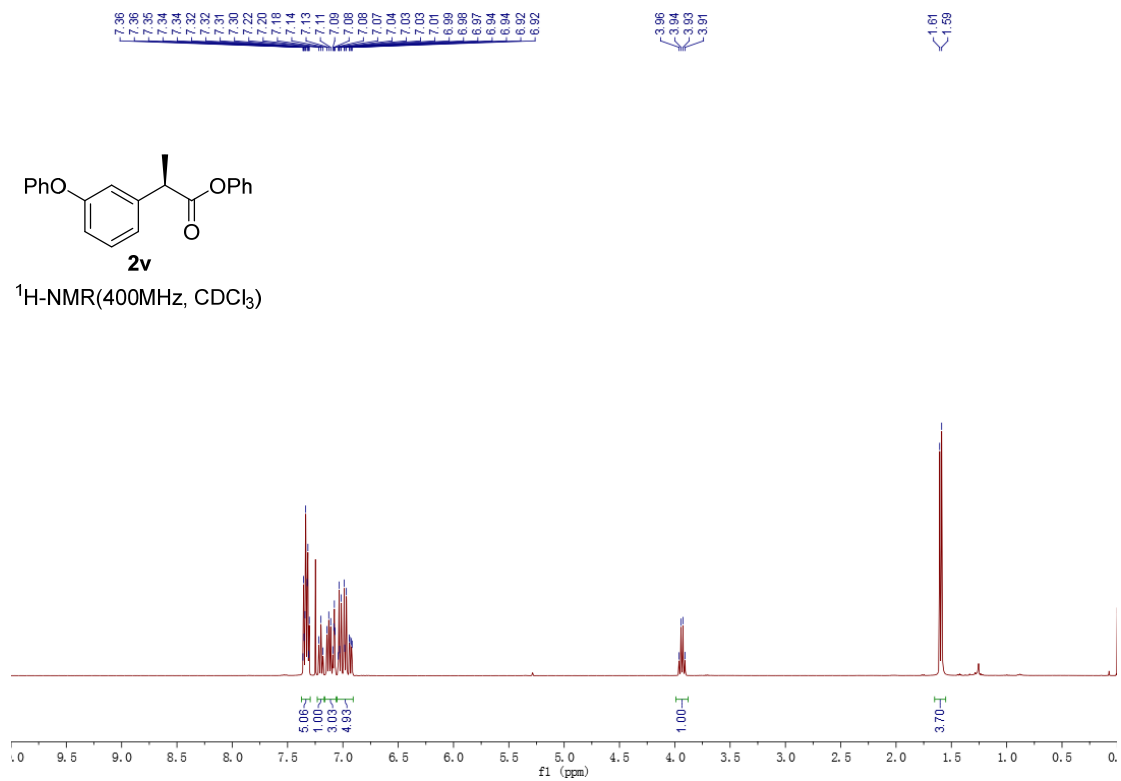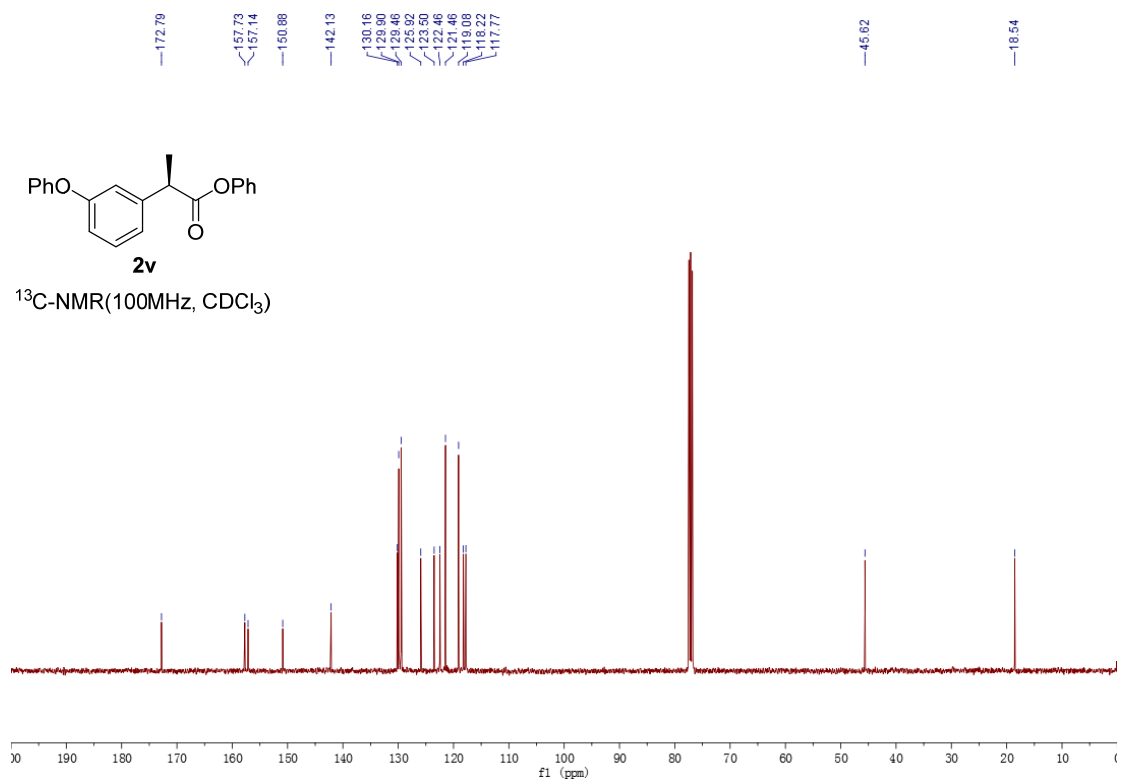

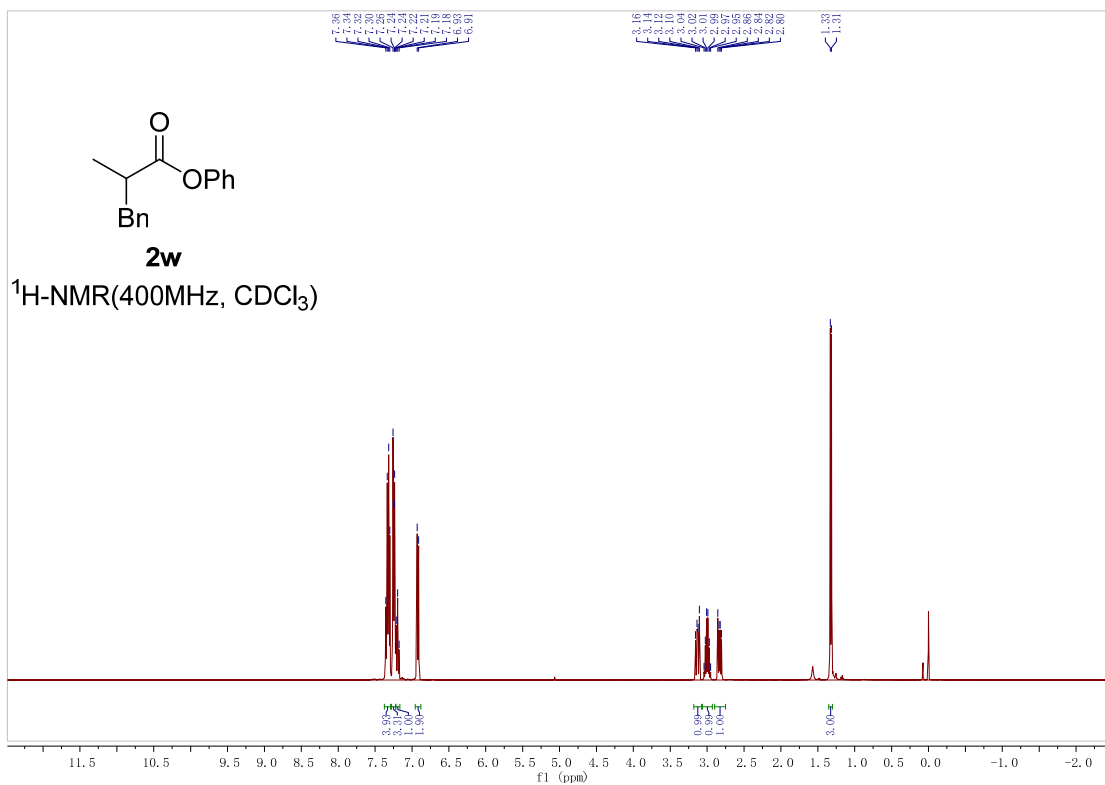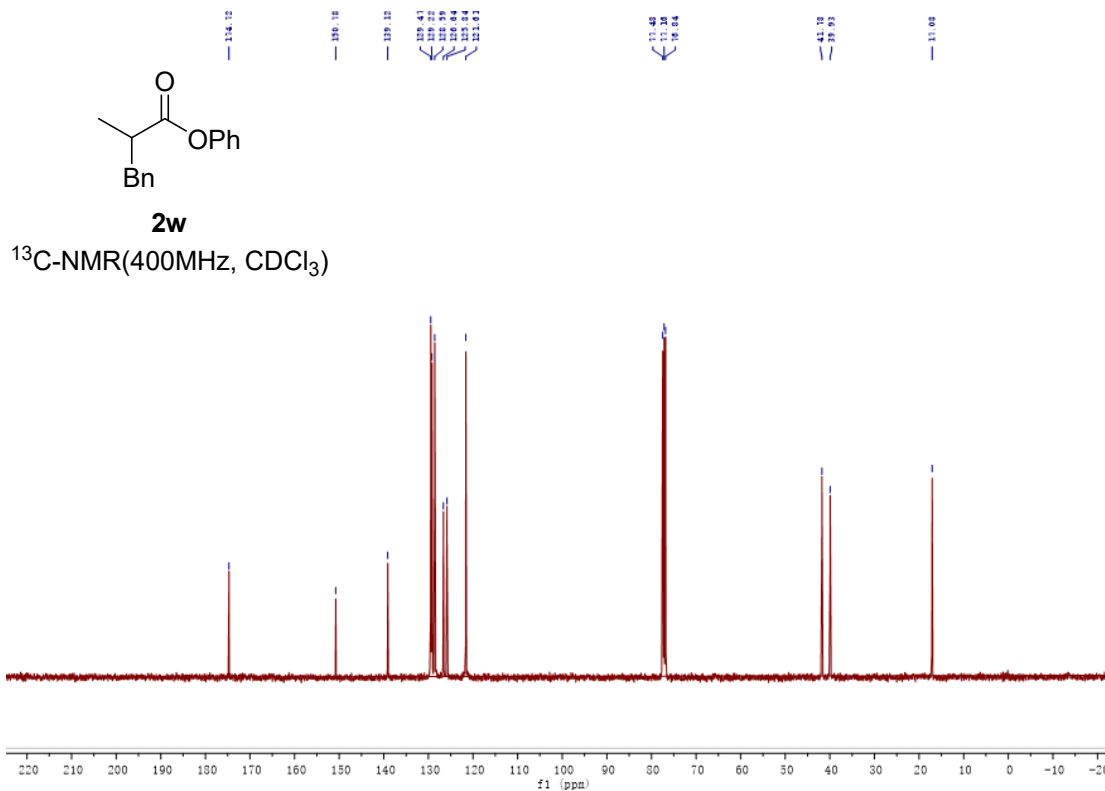

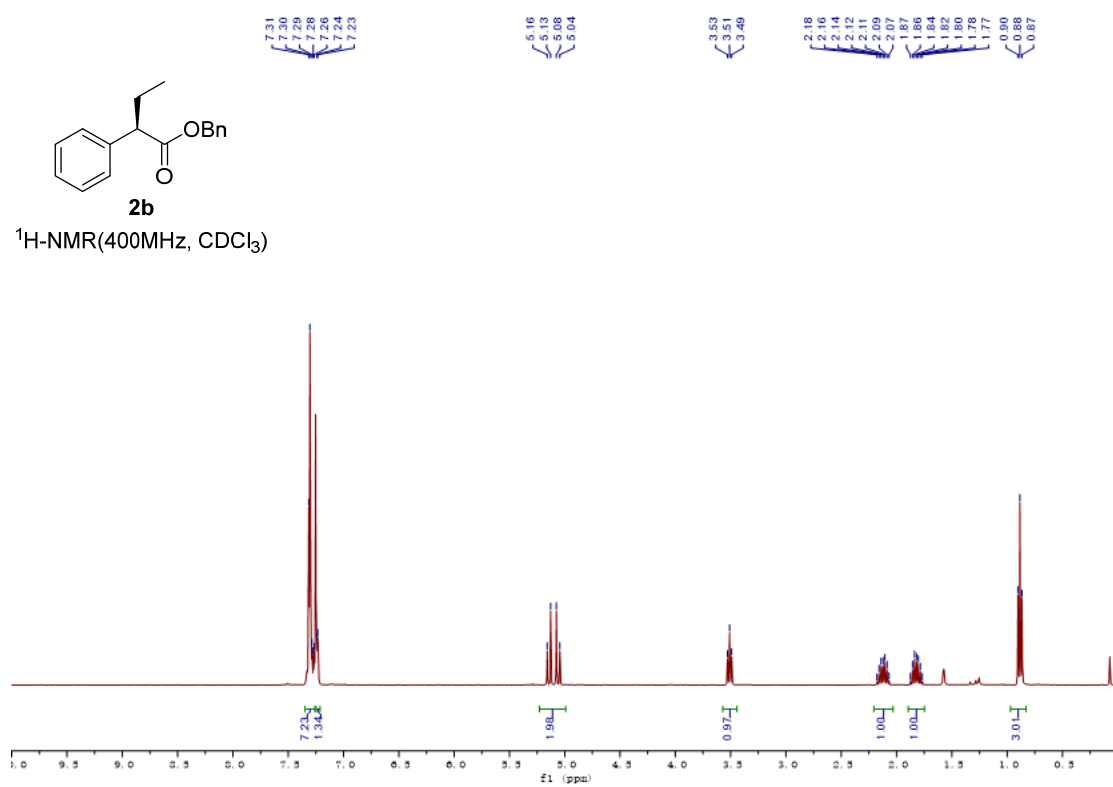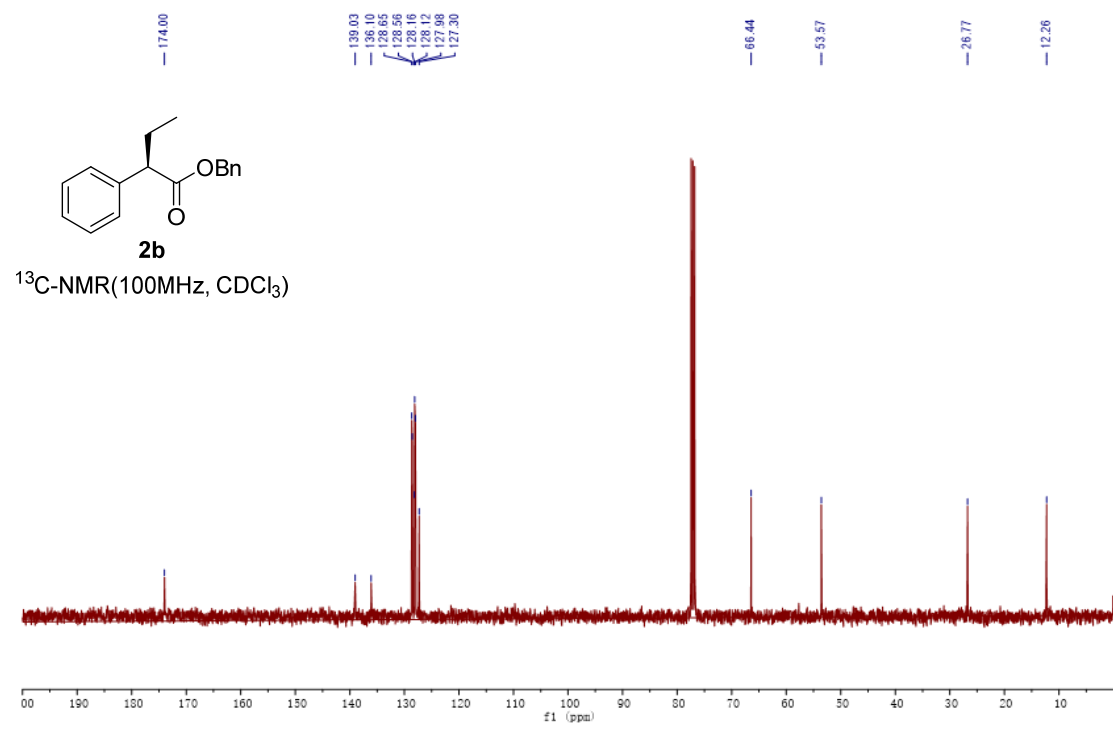

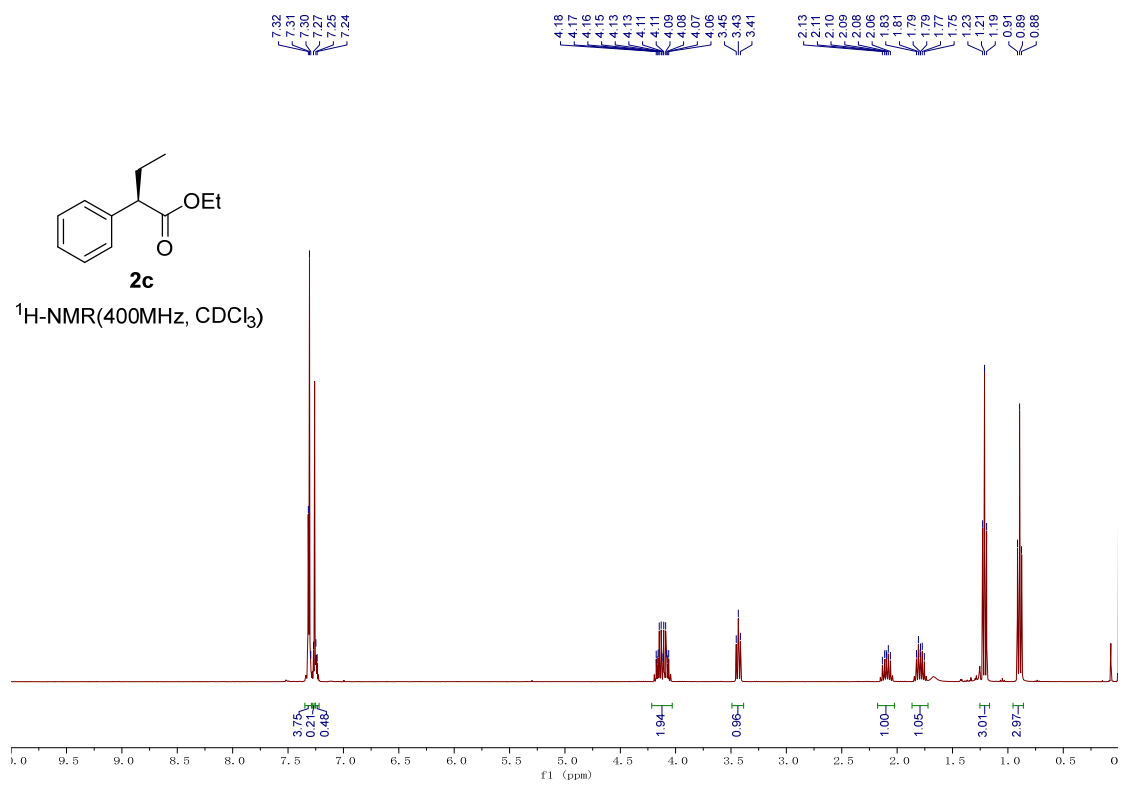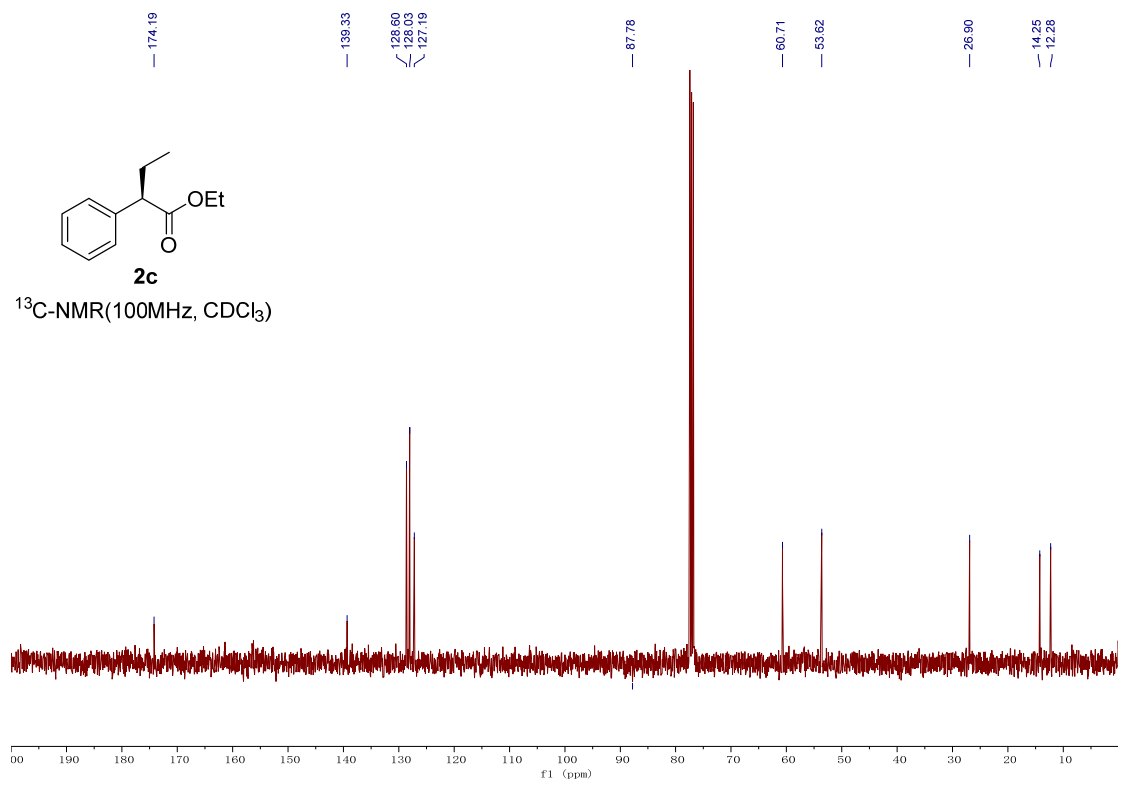

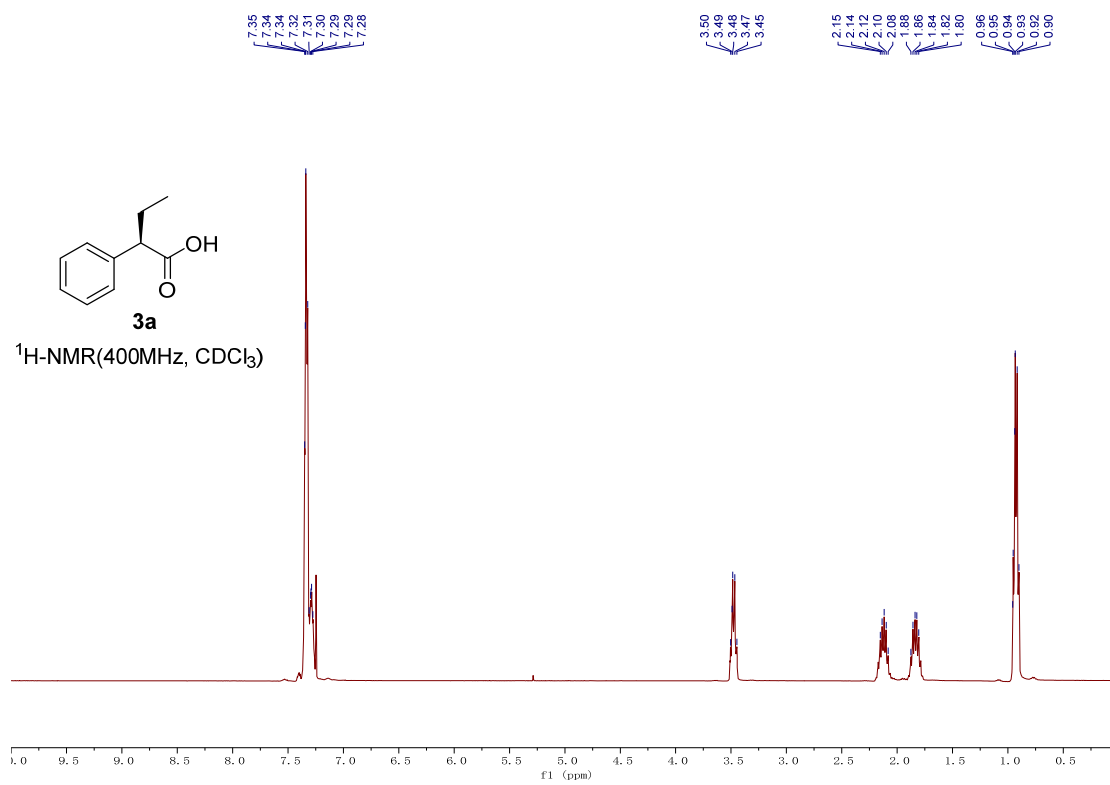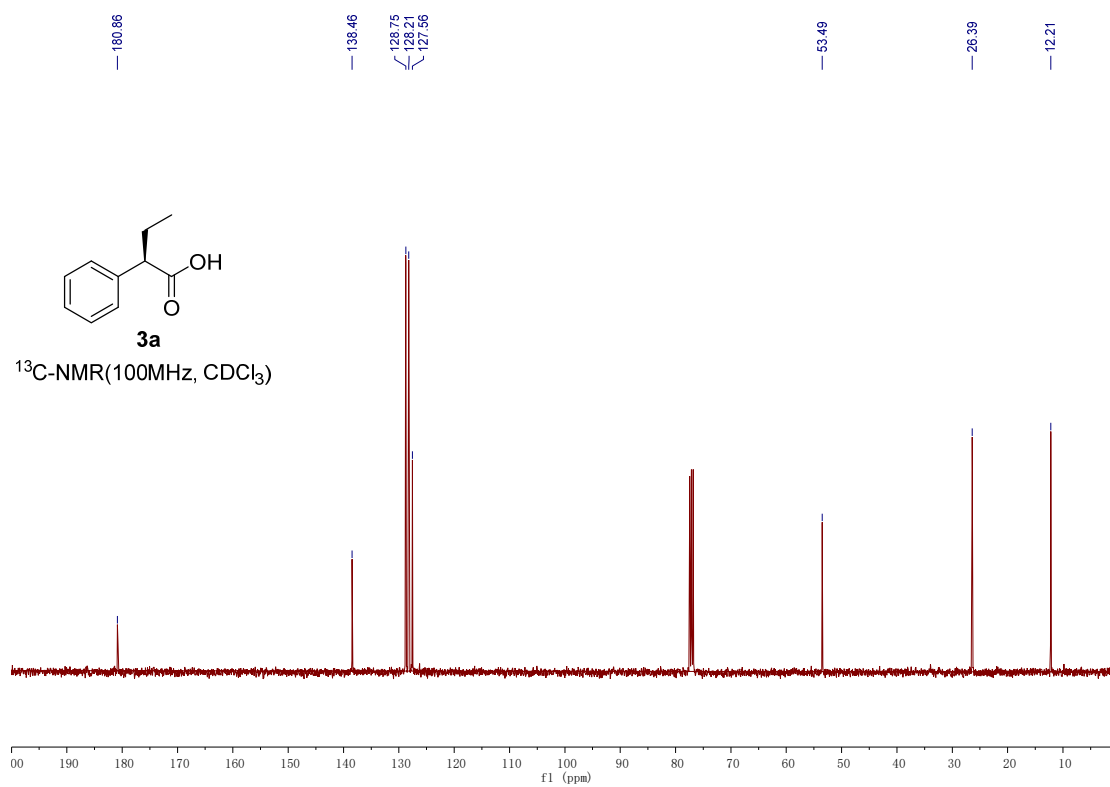



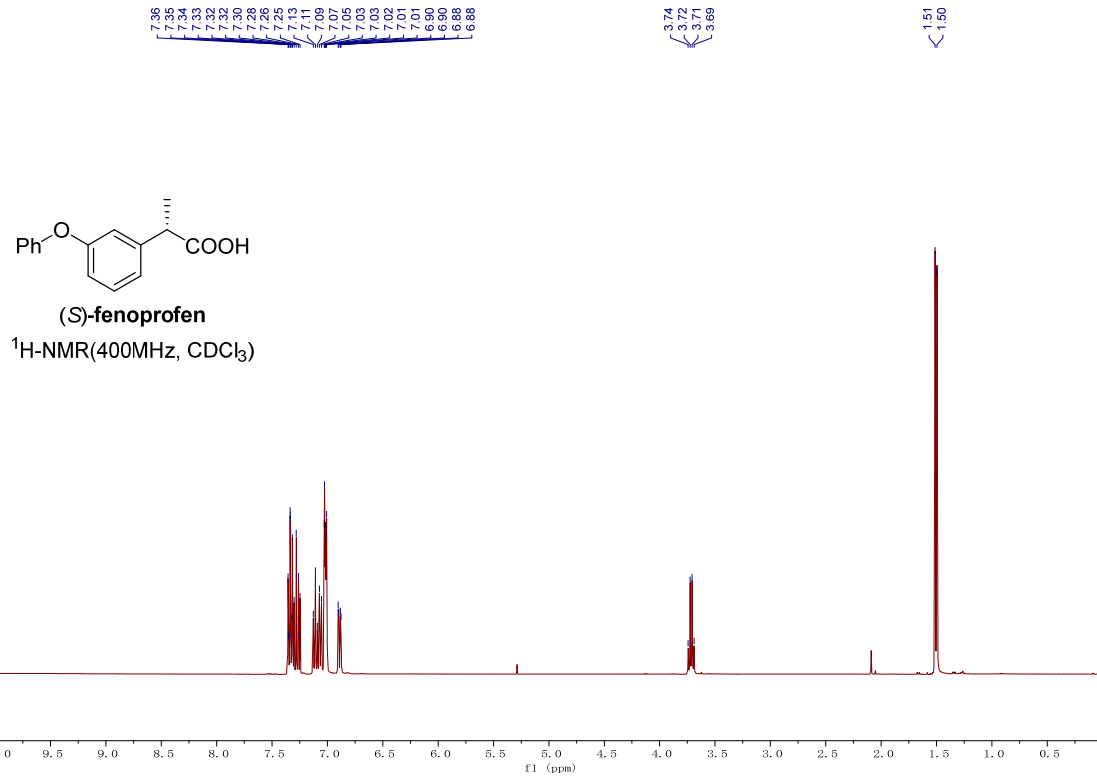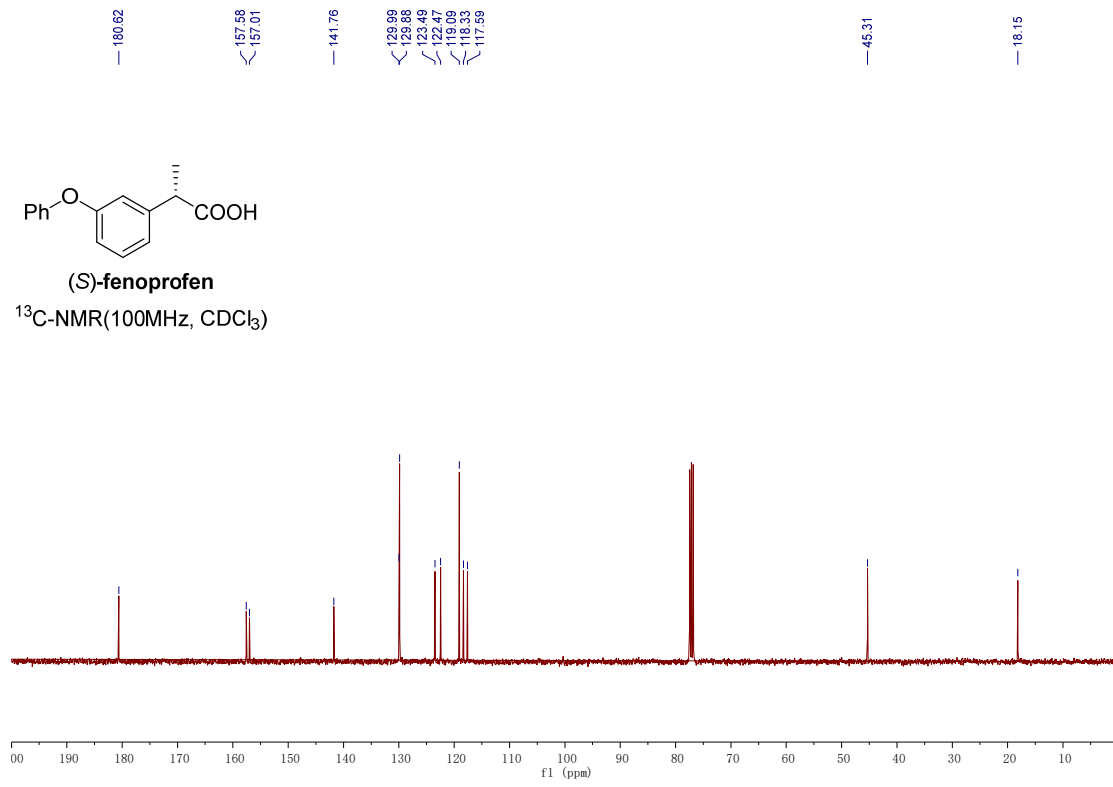

## HPLC Spectra Data:

### (R)-phenyl-2-phenylbutanoate (2a):

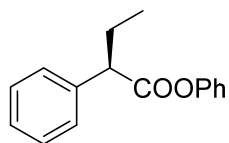

Column DAICEL Chiralcel OJ-H 5 $\mu$ m, heptane/*i*-PrOH 90:10, flow rate 1 mL/min, 25 °C, UV 210 nm

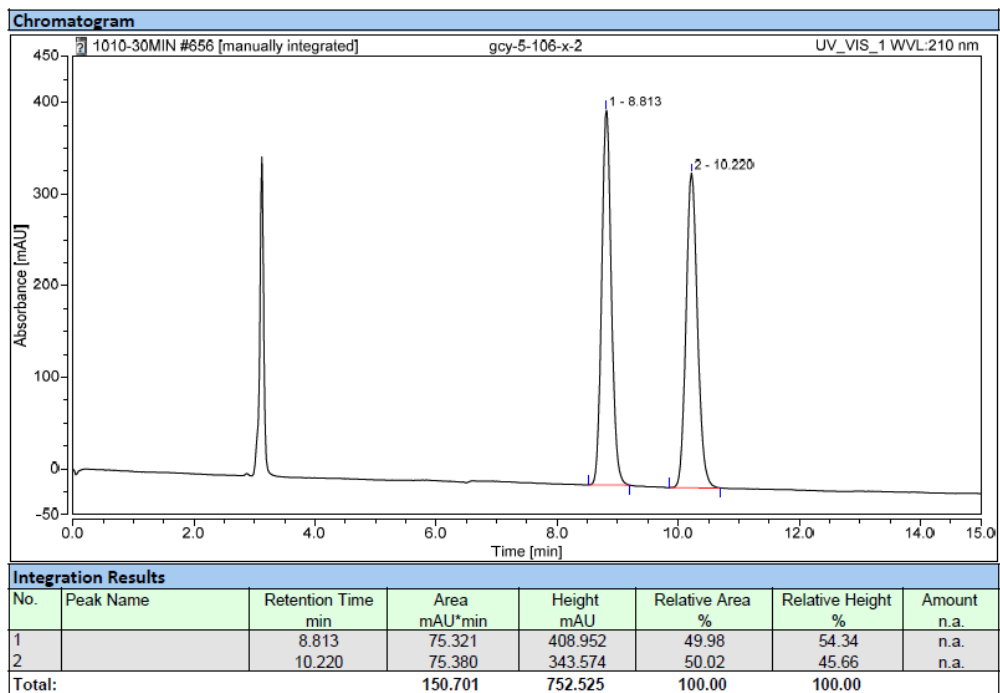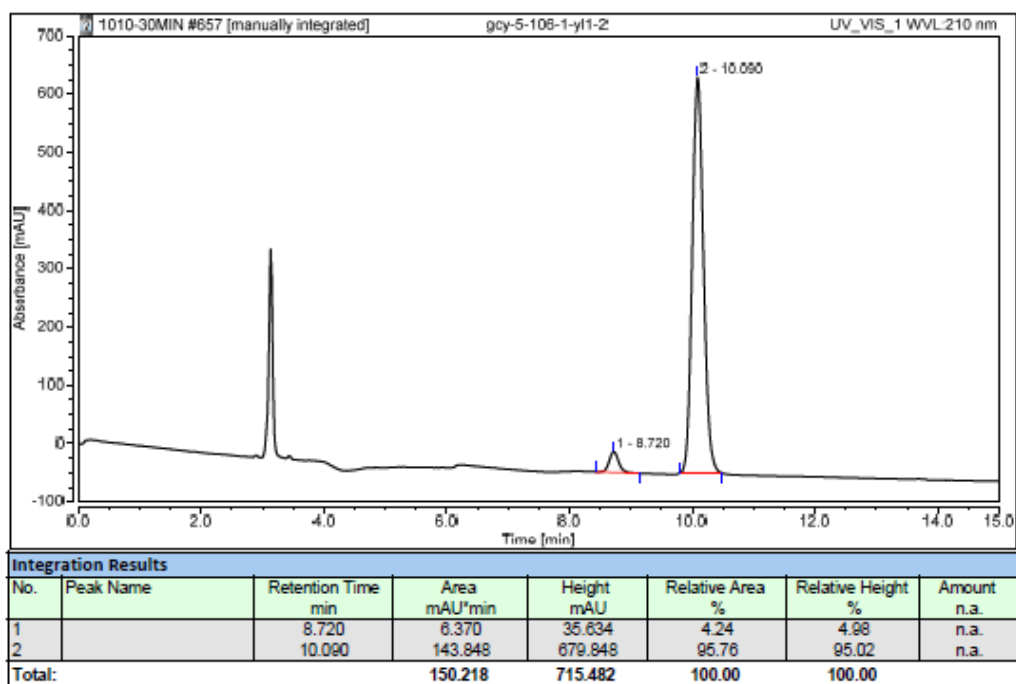

**(R)-phenyl -2-(4-methoxyphenyl) butanoate (2d):**

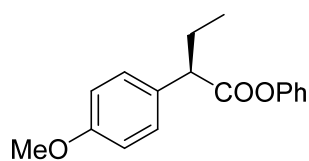

Column DAICEL Chiralcel OJ-H 5 $\mu$ m, heptane/i-PrOH 90:10, flow rate 1 mL/min, 25 °C, UV 204 nm

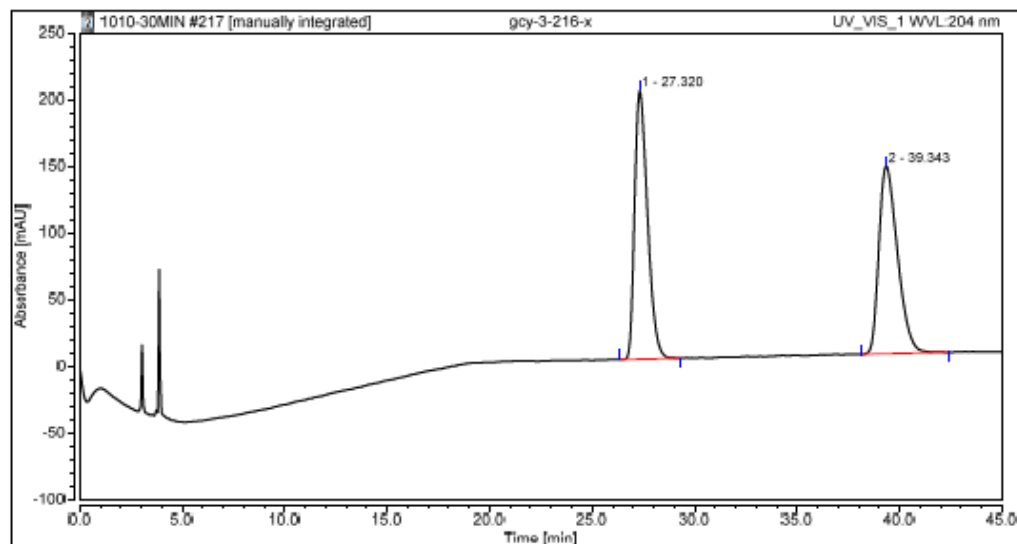

| Integration Results |           |                    |              |            |                 |                   |             |
|---------------------|-----------|--------------------|--------------|------------|-----------------|-------------------|-------------|
| No.                 | Peak Name | Retention Time min | Area mAU*min | Height mAU | Relative Area % | Relative Height % | Amount n.a. |
| 1                   |           | 27.320             | 146.641      | 201.031    | 49.82           | 58.88             | n.a.        |
| 2                   |           | 39.343             | 147.689      | 140.369    | 50.18           | 41.12             | n.a.        |
| Total:              |           |                    | 294.330      | 341.400    | 100.00          | 100.00            |             |

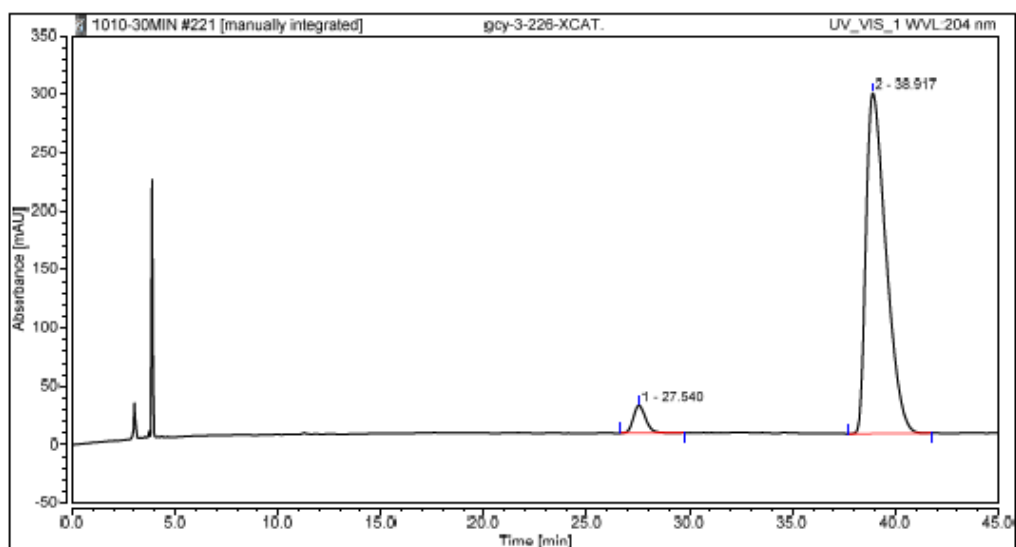

| Integration Results |           |                    |              |            |                 |                   |             |
|---------------------|-----------|--------------------|--------------|------------|-----------------|-------------------|-------------|
| No.                 | Peak Name | Retention Time min | Area mAU*min | Height mAU | Relative Area % | Relative Height % | Amount n.a. |
| 1                   |           | 27.540             | 16.115       | 23.689     | 4.69            | 7.51              | n.a.        |
| 2                   |           | 38.917             | 327.580      | 291.953    | 95.31           | 92.49             | n.a.        |
| Total:              |           |                    | 343.695      | 315.642    | 100.00          | 100.00            |             |

**(R)-phenyl -2-(p-tolyl) butanoate (2e):**

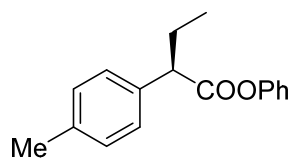

Column DAICEL Chiralcel OJ-H 5 $\mu$ m, heptane/i-PrOH 90:10, flow rate 1 mL/min, 25 °C, UV 204 nm

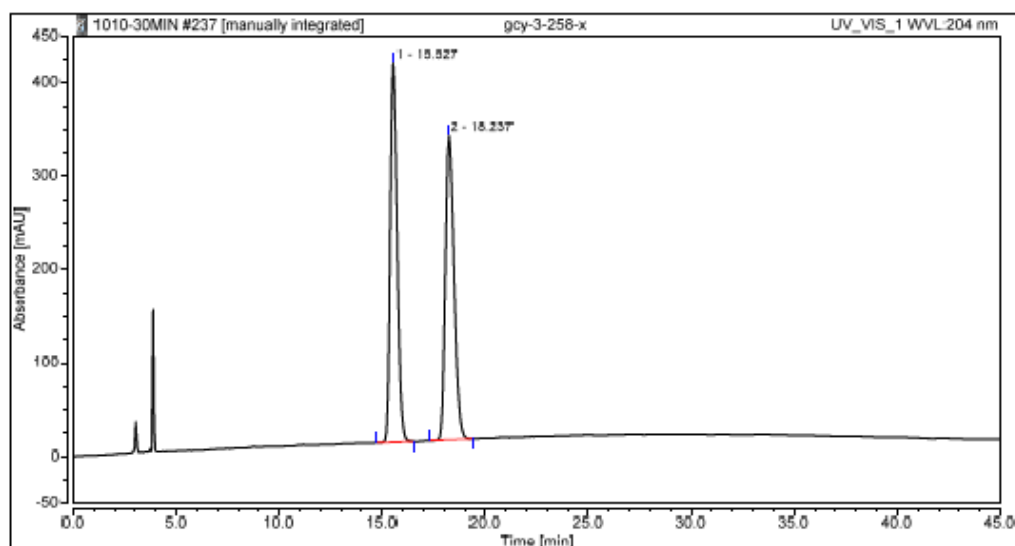

| Integration Results |           |                    |                           |            |                 |                   |        |
|---------------------|-----------|--------------------|---------------------------|------------|-----------------|-------------------|--------|
| No.                 | Peak Name | Retention Time min | Area mAU <sup>2</sup> min | Height mAU | Relative Area % | Relative Height % | Amount |
| 1                   |           | 15.527             | 159.284                   | 405.226    | 50.10           | 55.47             | n.a.   |
| 2                   |           | 18.237             | 158.655                   | 325.326    | 49.90           | 44.53             | n.a.   |
| Total:              |           |                    | 317.939                   | 730.552    | 100.00          | 100.00            |        |

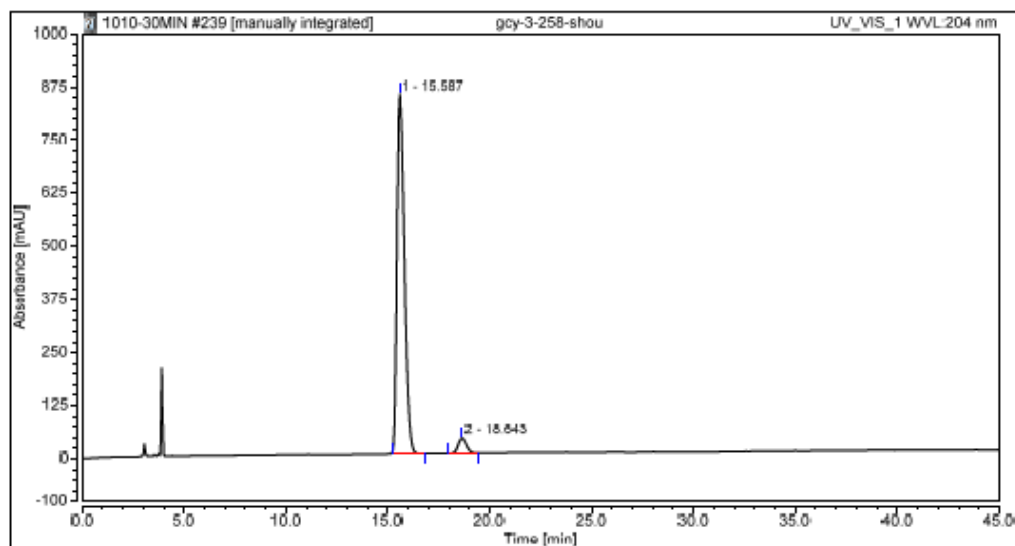

| Integration Results |           |                    |                           |            |                 |                   |        |
|---------------------|-----------|--------------------|---------------------------|------------|-----------------|-------------------|--------|
| No.                 | Peak Name | Retention Time min | Area mAU <sup>2</sup> min | Height mAU | Relative Area % | Relative Height % | Amount |
| 1                   |           | 15.587             | 352.955                   | 845.801    | 95.42           | 96.00             | n.a.   |
| 2                   |           | 18.643             | 16.940                    | 35.228     | 4.58            | 4.00              | n.a.   |
| Total:              |           |                    | 369.895                   | 881.029    | 100.00          | 100.00            |        |

**(R)-phenyl -2-(m-tolyl) butanoate (2f):**

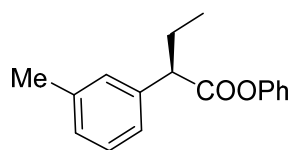

Column DAICEL Chiralcel OJ-H 5 $\mu$ m, heptane/i-PrOH 90:10, flow rate 1 mL/min, 25 °C, UV 204 nm

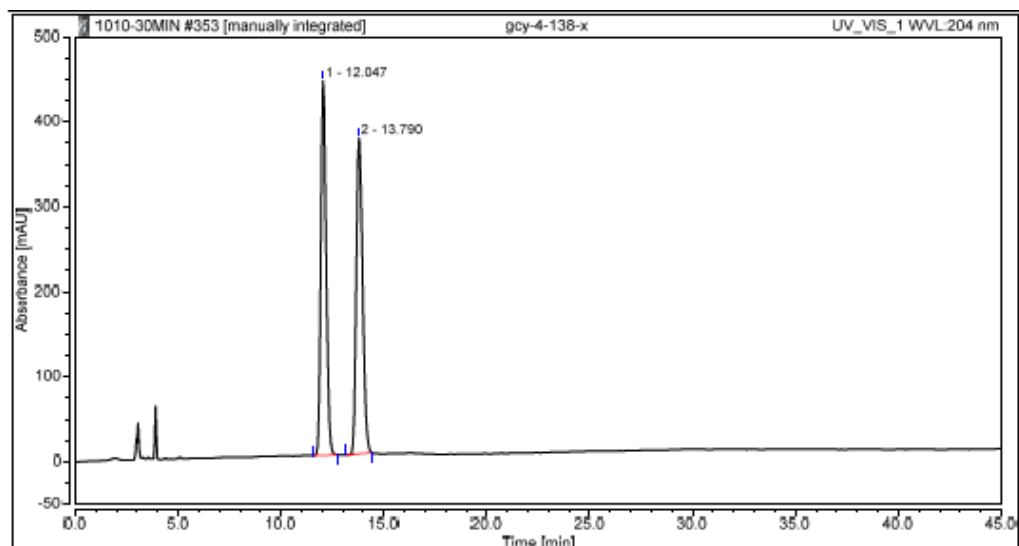

| Integration Results |           |                    |              |            |                 |                   |        |
|---------------------|-----------|--------------------|--------------|------------|-----------------|-------------------|--------|
| No.                 | Peak Name | Retention Time min | Area mAU*min | Height mAU | Relative Area % | Relative Height % | Amount |
| 1                   |           | 12.047             | 131.384      | 440.721    | 50.23           | 54.22             | n.a.   |
| 2                   |           | 13.790             | 130.188      | 372.094    | 49.77           | 45.78             | n.a.   |
| Total:              |           |                    | 261.572      | 812.815    | 100.00          | 100.00            |        |

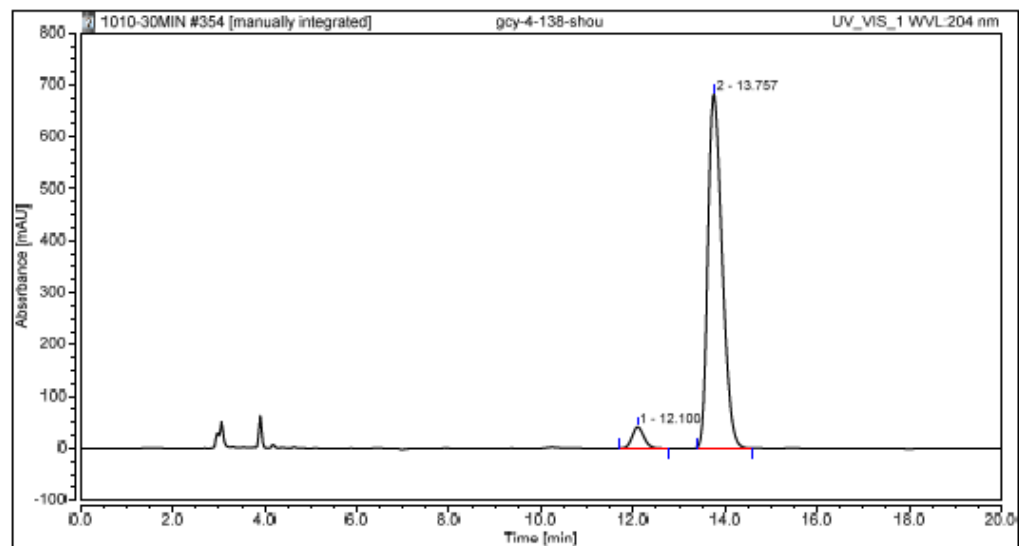

| Integration Results |           |                    |              |            |                 |                   |        |
|---------------------|-----------|--------------------|--------------|------------|-----------------|-------------------|--------|
| No.                 | Peak Name | Retention Time min | Area mAU*min | Height mAU | Relative Area % | Relative Height % | Amount |
| 1                   |           | 12.100             | 12.230       | 41.157     | 4.78            | 5.70              | n.a.   |
| 2                   |           | 13.757             | 243.751      | 681.531    | 95.22           | 94.30             | n.a.   |
| Total:              |           |                    | 255.981      | 722.689    | 100.00          | 100.00            |        |

**(R)-ethyl-2-(o-tolyl) butanoate (2g):**

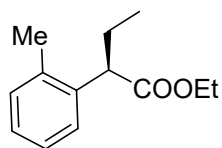

Column DAICEL Chiralcel OJ-H 5 $\mu$ m, heptane/i-PrOH 99.8:0.2, flow rate 0.6 mL/min, 25 °C, UV 204 nm

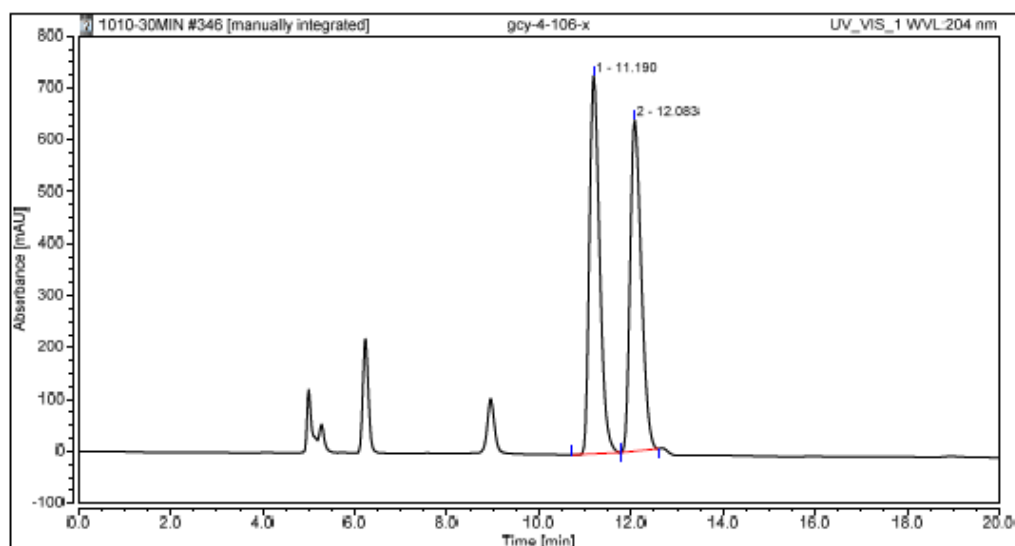

| Integration Results |           |                    |              |            |                 |                   |        |
|---------------------|-----------|--------------------|--------------|------------|-----------------|-------------------|--------|
| No.                 | Peak Name | Retention Time min | Area mAU*min | Height mAU | Relative Area % | Relative Height % | Amount |
| 1                   |           | 11.190             | 186.173      | 727.831    | 50.88           | 53.31             | n.a.   |
| 2                   |           | 12.083             | 179.908      | 637.523    | 49.14           | 46.69             | n.a.   |
| Total:              |           |                    | 366.080      | 1365.354   | 100.00          | 100.00            |        |

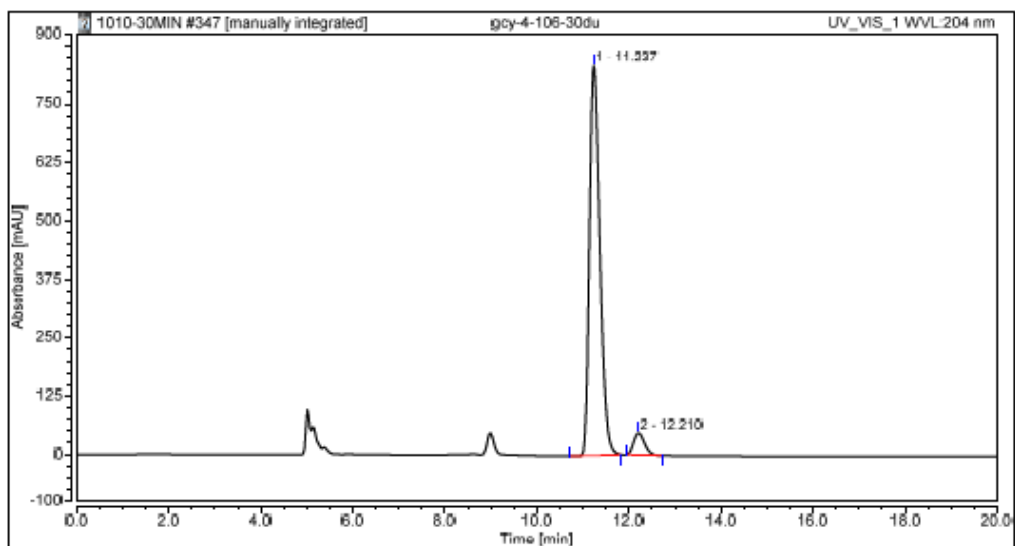

| Integration Results |           |                    |              |            |                 |                   |        |
|---------------------|-----------|--------------------|--------------|------------|-----------------|-------------------|--------|
| No.                 | Peak Name | Retention Time min | Area mAU*min | Height mAU | Relative Area % | Relative Height % | Amount |
| 1                   |           | 11.237             | 217.610      | 835.010    | 94.39           | 94.61             | n.a.   |
| 2                   |           | 12.210             | 12.925       | 47.588     | 5.61            | 5.39              | n.a.   |
| Total:              |           |                    | 230.534      | 882.598    | 100.00          | 100.00            |        |

**(R)-phenyl-2-(4-bromophenyl) butanoate (2h):**

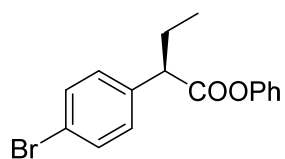

Column DAICEL Chiralcel OJ-H 5 $\mu$ m, heptane/*i*-PrOH 95:5, flow rate 1.0 mL/min, 25 °C, UV 204 nm

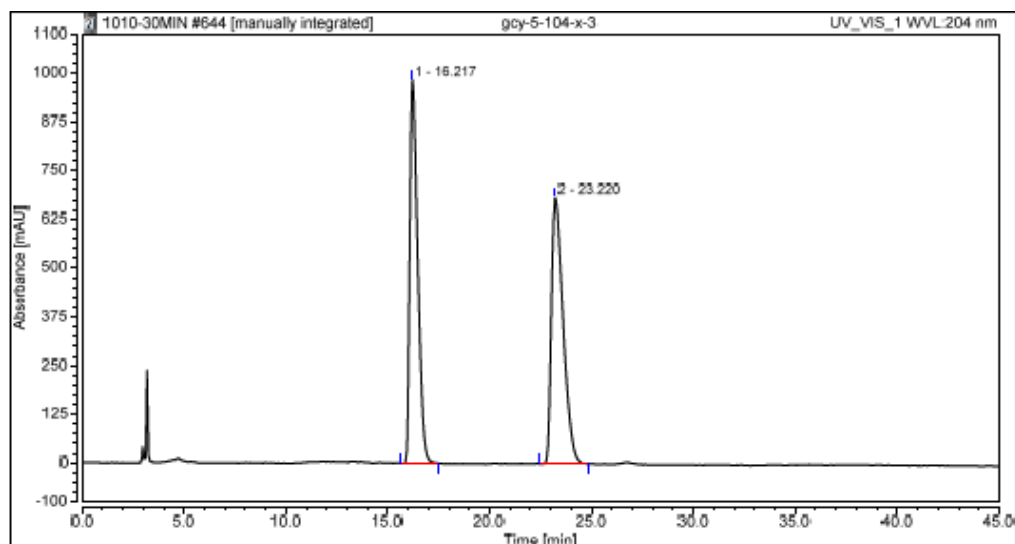

| No.    | Peak Name | Retention Time min | Area mAU*min | Height mAU | Relative Area % | Relative Height % | Amount |
|--------|-----------|--------------------|--------------|------------|-----------------|-------------------|--------|
| 1      |           | 16.217             | 440.221      | 983.394    | 49.22           | 59.02             | n.a.   |
| 2      |           | 23.220             | 454.202      | 682.753    | 50.78           | 40.98             | n.a.   |
| Total: |           |                    | 894.423      | 1666.146   | 100.00          | 100.00            |        |

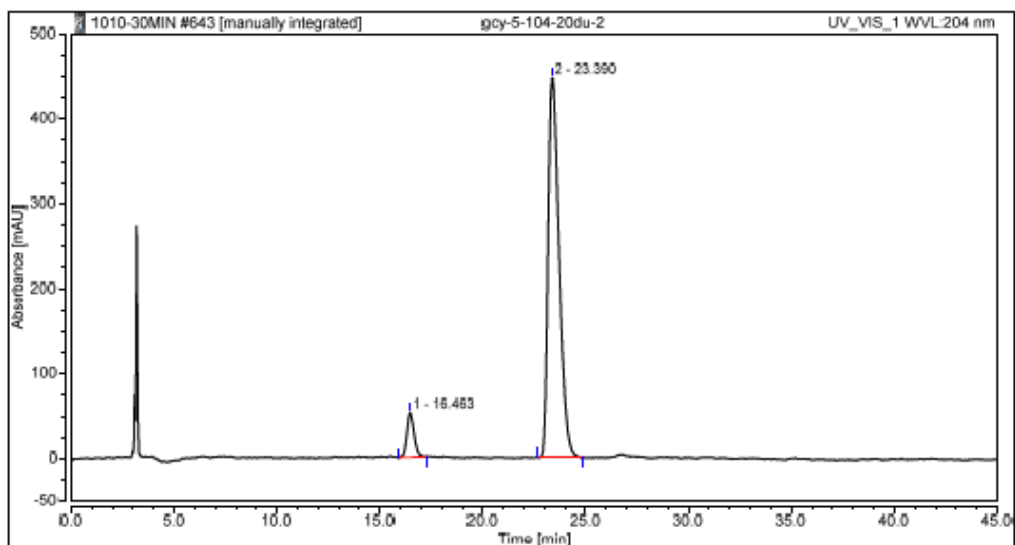

| No.    | Peak Name | Retention Time min | Area mAU*min | Height mAU | Relative Area % | Relative Height % | Amount |
|--------|-----------|--------------------|--------------|------------|-----------------|-------------------|--------|
| 1      |           | 16.463             | 21.185       | 53.150     | 7.19            | 10.62             | n.a.   |
| 2      |           | 23.390             | 273.313      | 447.246    | 92.81           | 89.38             | n.a.   |
| Total: |           |                    | 294.497      | 500.396    | 100.00          | 100.00            |        |

**(R)-phenyl-2-(4-iodophenyl) butanoate (2i):**

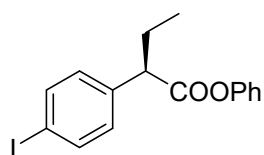

Column DAICEL Chiralcel OJ-H 5 $\mu$ m, heptane/*i*-PrOH 95:5, flow rate 1.0 mL/min, 25 °C, UV 204 nm

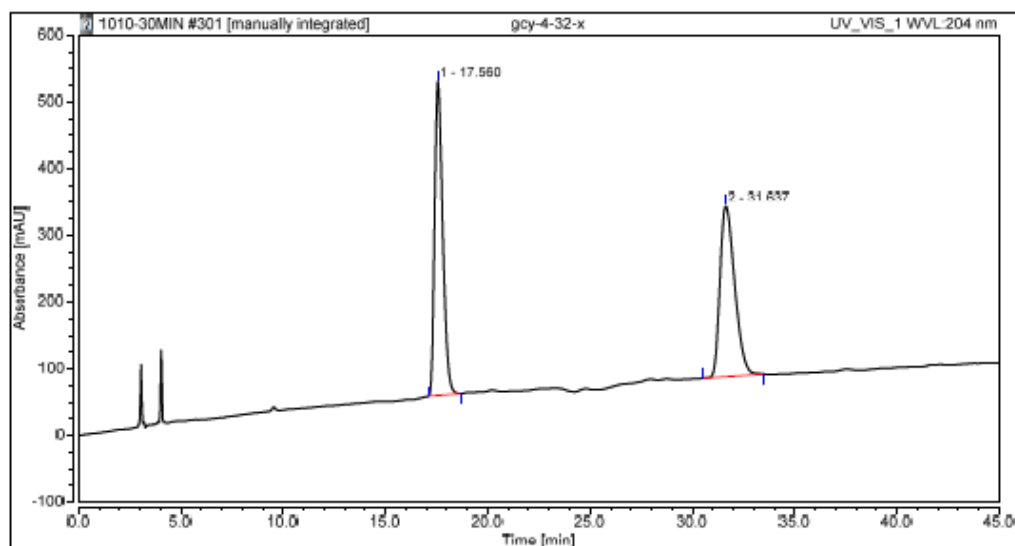

| No.    | Peak Name | Retention Time min | Area mAU*min | Height mAU | Relative Area % | Relative Height % | Amount |
|--------|-----------|--------------------|--------------|------------|-----------------|-------------------|--------|
| 1      |           | 17.560             | 215.180      | 470.846    | 50.29           | 64.74             | n.a.   |
| 2      |           | 31.637             | 212.736      | 256.459    | 49.71           | 35.26             | n.a.   |
| Total: |           |                    | 427.916      | 727.305    | 100.00          | 100.00            |        |

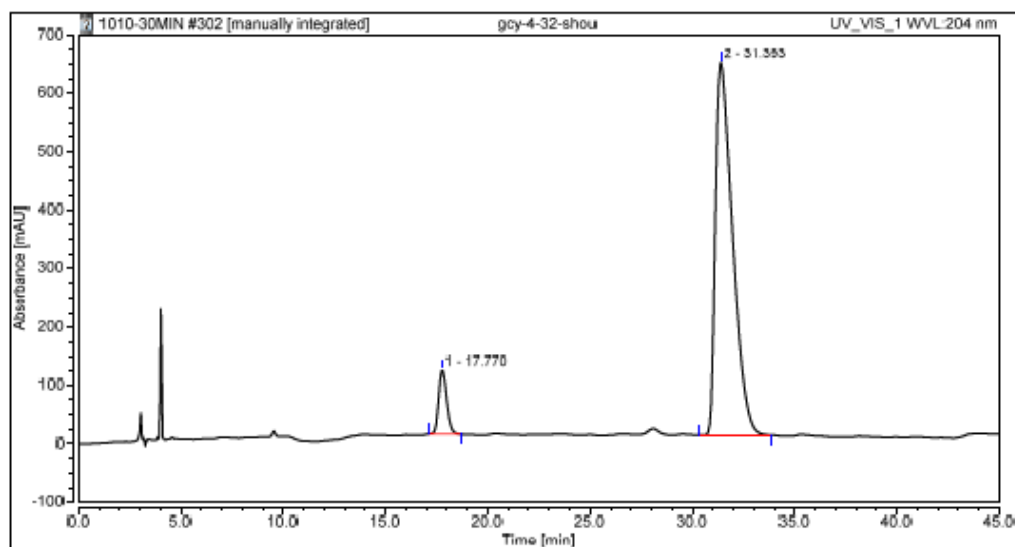

| No.    | Peak Name | Retention Time min | Area mAU*min | Height mAU | Relative Area % | Relative Height % | Amount |
|--------|-----------|--------------------|--------------|------------|-----------------|-------------------|--------|
| 1      |           | 17.770             | 49.588       | 110.094    | 7.39            | 14.72             | n.a.   |
| 2      |           | 31.393             | 621.022      | 637.648    | 92.61           | 85.28             | n.a.   |
| Total: |           |                    | 670.608      | 747.742    | 100.00          | 100.00            |        |



**(R)-methyl-4-(1-(benzyloxy)-1-oxobutan-2-yl)benzoate (2j):**

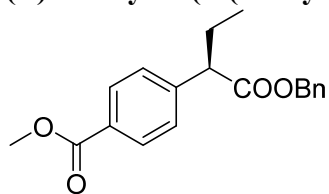

Column DAICEL Chiralcel OJ-H 5 $\mu$ m, heptane/i-PrOH 80:20, flow rate 1.0 mL/min, 25 °C, UV 254 nm

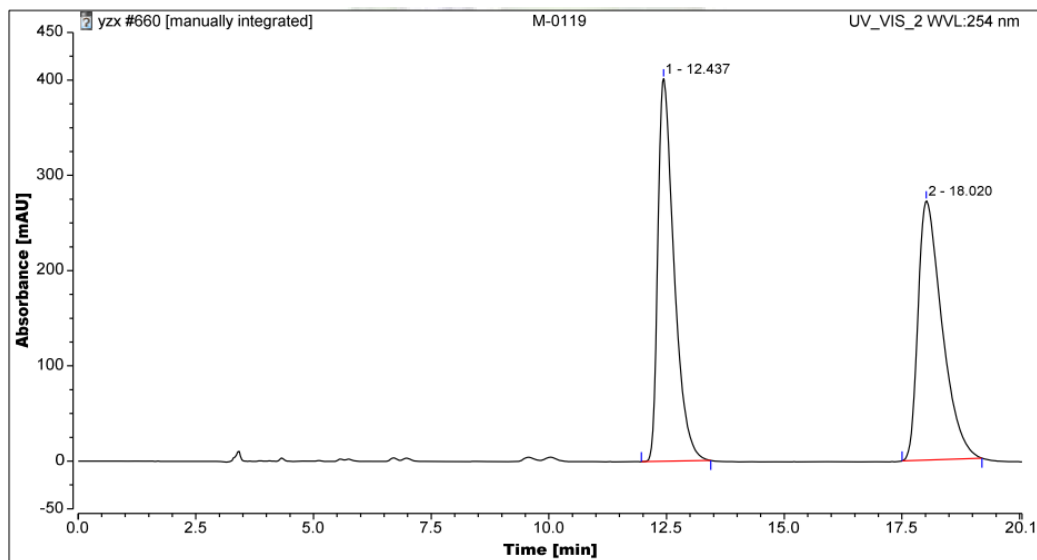

| No.    | Peak Name | Retention Time min | Area mAU*min | Height mAU | Relative Area % | Relative Height % | Amount |
|--------|-----------|--------------------|--------------|------------|-----------------|-------------------|--------|
| 1      |           | 12.437             | 159.669      | 401.560    | 49.82           | 59.61             | n.a.   |
| 2      |           | 18.020             | 160.803      | 272.089    | 50.18           | 40.39             | n.a.   |
| Total: |           |                    | 320.472      | 673.649    | 100.00          | 100.00            |        |

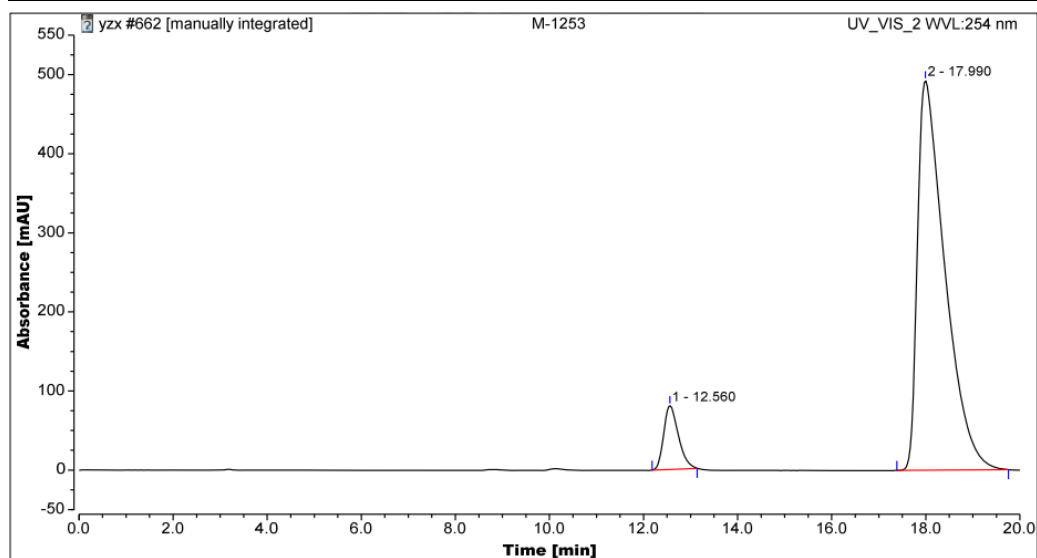

| No.    | Peak Name | Retention Time min | Area mAU*min | Height mAU | Relative Area % | Relative Height % | Amount |
|--------|-----------|--------------------|--------------|------------|-----------------|-------------------|--------|
| 1      |           | 12.560             | 29.049       | 80.555     | 8.04            | 14.05             | n.a.   |
| 2      |           | 17.990             | 332.370      | 492.770    | 91.96           | 85.95             | n.a.   |
| Total: |           |                    | 361.419      | 573.326    | 100.00          | 100.00            |        |

**(R)-benzyl -2-(4-(trifluoromethyl)phenyl)butanoate (2k):**

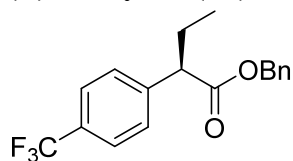

Column DAICEL Chiralcel OJ-H 5 $\mu$ m, heptane/i-PrOH 98:2, flow rate 1.0 mL/min, 25 °C, UV 210 nm

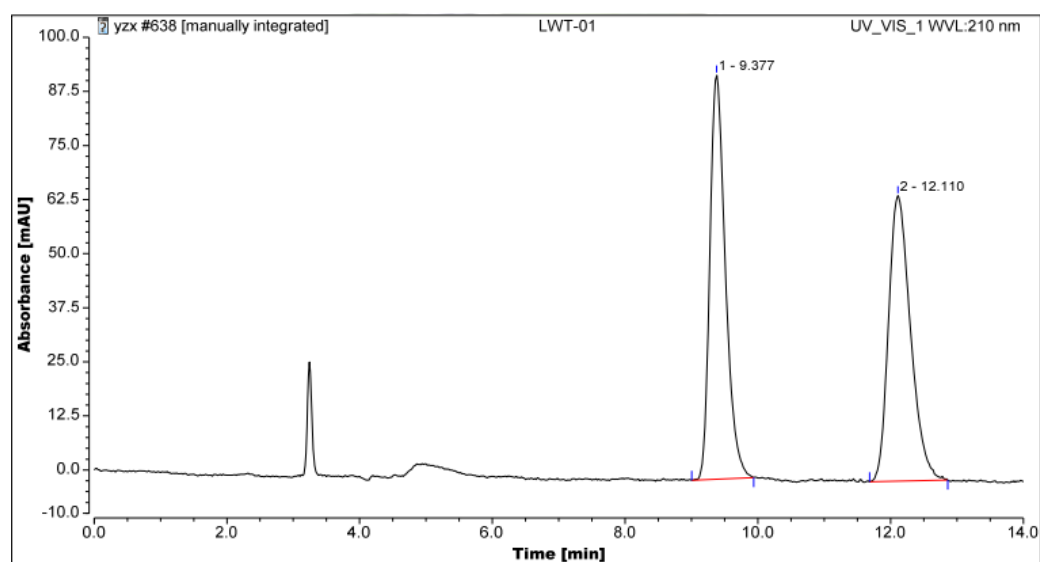

| No.    | Peak Name | Retention Time min | Area mAU*min | Height mAU | Relative Area % | Relative Height % | Amount n.a. |
|--------|-----------|--------------------|--------------|------------|-----------------|-------------------|-------------|
| 1      |           | 9.377              | 25.302       | 93.428     | 50.00           | 58.61             | n.a.        |
| 2      |           | 12.110             | 25.302       | 65.983     | 50.00           | 41.39             | n.a.        |
| Total: |           |                    | 50.604       | 159.411    | 100.00          | 100.00            |             |

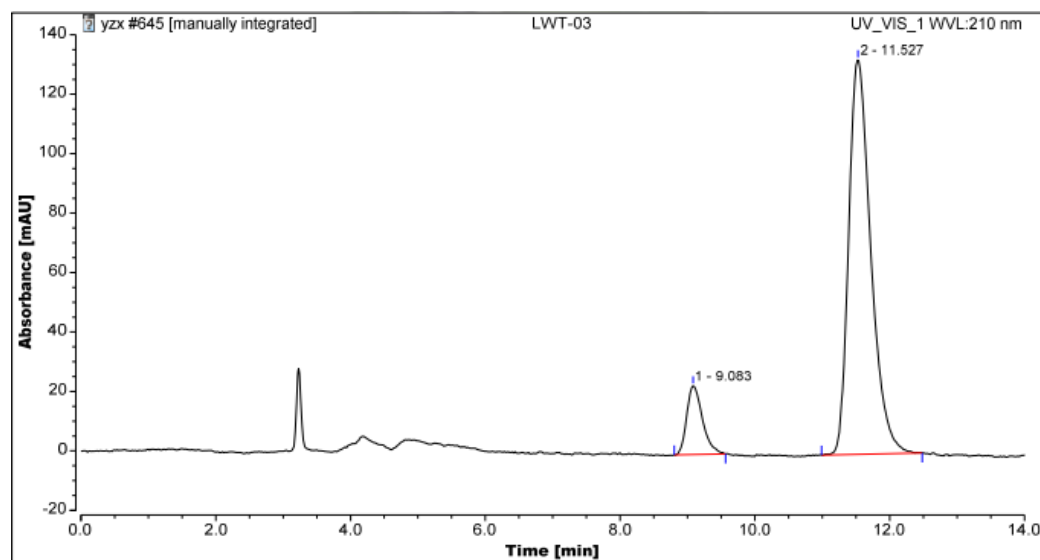

| No.    | Peak Name | Retention Time min | Area mAU*min | Height mAU | Relative Area % | Relative Height % | Amount n.a. |
|--------|-----------|--------------------|--------------|------------|-----------------|-------------------|-------------|
| 1      |           | 9.083              | 6.222        | 23.127     | 10.98           | 14.84             | n.a.        |
| 2      |           | 11.527             | 50.451       | 132.761    | 89.02           | 85.16             | n.a.        |
| Total: |           |                    | 56.672       | 155.888    | 100.00          | 100.00            |             |

**(R)-phenyl-2-([1,1'-biphenyl]-4-yl) butanoate (2l):**

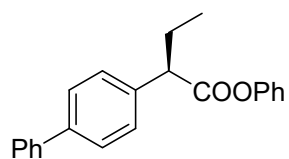

Column DAICEL Chiralcel OJ-H 5 $\mu$ m, heptane/i-PrOH 85:15, flow rate 1.0 mL/min, 35 °C, UV 204 nm

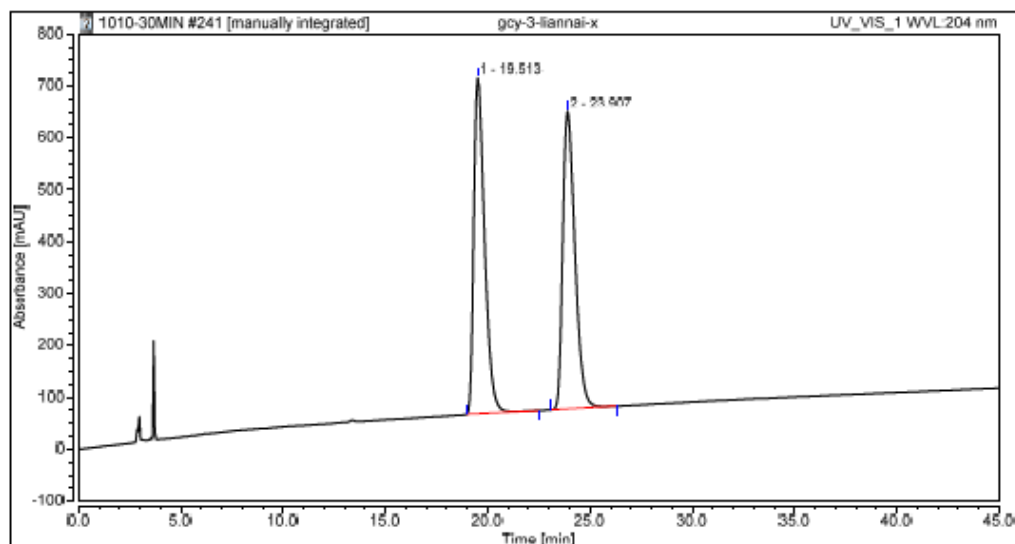

| Integration Results |           |                    |              |            |                 |                   |        |
|---------------------|-----------|--------------------|--------------|------------|-----------------|-------------------|--------|
| No.                 | Peak Name | Retention Time min | Area mAU*min | Height mAU | Relative Area % | Relative Height % | Amount |
| 1                   |           | 19.513             | 393.663      | 647.320    | 50.04           | 53.03             | n.a.   |
| 2                   |           | 23.907             | 392.956      | 573.395    | 49.96           | 46.97             | n.a.   |
| Total:              |           |                    | 786.619      | 1220.715   | 100.00          | 100.00            |        |

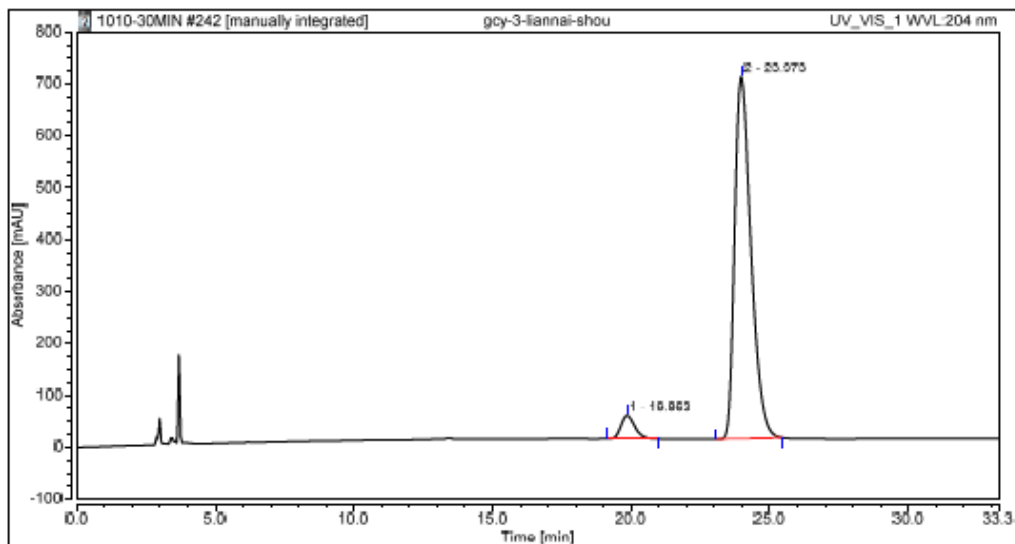

| Integration Results |           |                    |              |            |                 |                   |        |
|---------------------|-----------|--------------------|--------------|------------|-----------------|-------------------|--------|
| No.                 | Peak Name | Retention Time min | Area mAU*min | Height mAU | Relative Area % | Relative Height % | Amount |
| 1                   |           | 19.863             | 25.959       | 44.592     | 5.17            | 6.01              | n.a.   |
| 2                   |           | 23.973             | 476.373      | 697.155    | 94.83           | 93.99             | n.a.   |
| Total:              |           |                    | 502.332      | 741.746    | 100.00          | 100.00            |        |

**(R)-phenyl-2-(naphthalen-2-yl) butanoate (2m):**

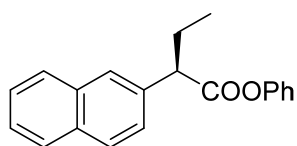

Column DAICEL Chiralcel OJ-H 5 $\mu$ m, heptane/i-PrOH 85:15, flow rate 1.0 mL/min, 25 °C, UV 204 nm

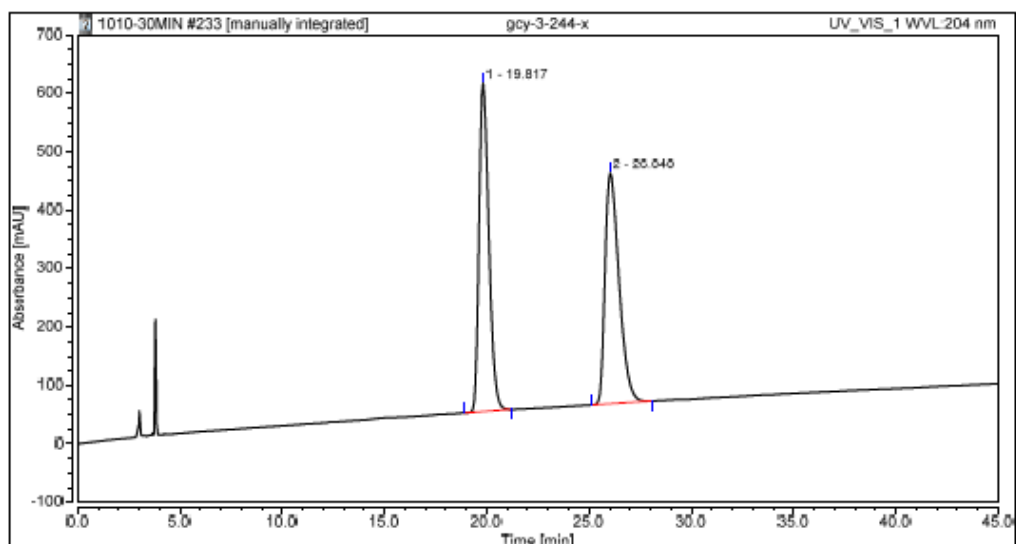

| No.    | Peak Name | Retention Time min | Area mAU*min | Height mAU | Relative Area % | Relative Height % | Amount |
|--------|-----------|--------------------|--------------|------------|-----------------|-------------------|--------|
| 1      |           | 19.817             | 312.943      | 562.180    | 50.01           | 58.71             | n.a.   |
| 2      |           | 26.040             | 312.787      | 395.434    | 49.99           | 41.29             | n.a.   |
| Total: |           |                    | 625.730      | 957.614    | 100.00          | 100.00            |        |

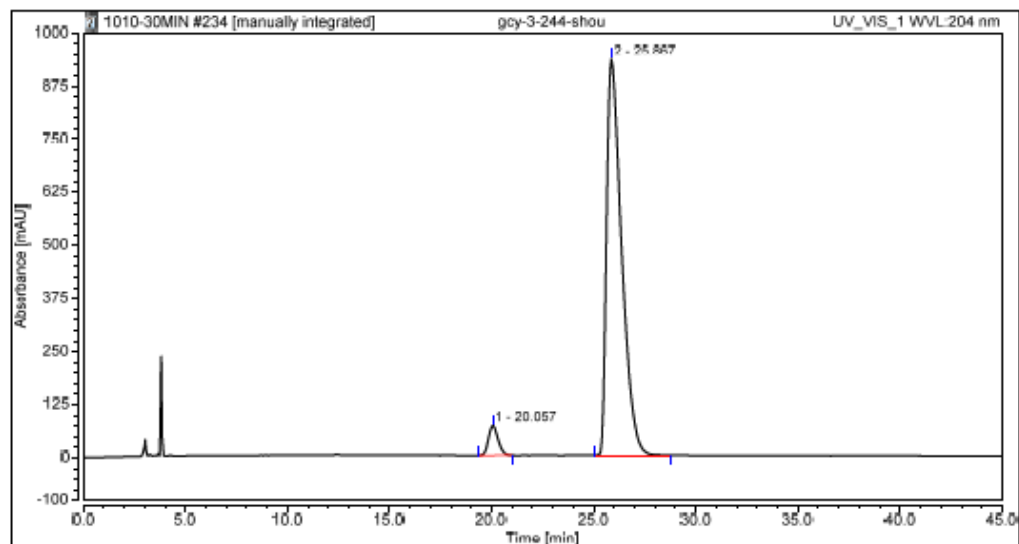

| No.    | Peak Name | Retention Time min | Area mAU*min | Height mAU | Relative Area % | Relative Height % | Amount |
|--------|-----------|--------------------|--------------|------------|-----------------|-------------------|--------|
| 1      |           | 20.057             | 38.336       | 70.234     | 4.61            | 7.00              | n.a.   |
| 2      |           | 26.867             | 793.563      | 933.324    | 95.39           | 93.00             | n.a.   |
| Total: |           |                    | 831.899      | 1003.558   | 100.00          | 100.00            |        |

**(R)-phenyl-2-(thiophen-2-yl) butanoate (2n):**

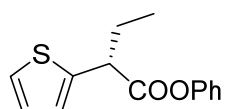

Column DAICEL Chiralcel OJ-H 5 $\mu$ m, heptane/i-PrOH 85:15, flow rate 1.0 mL/min, 25 °C, UV 204 nm

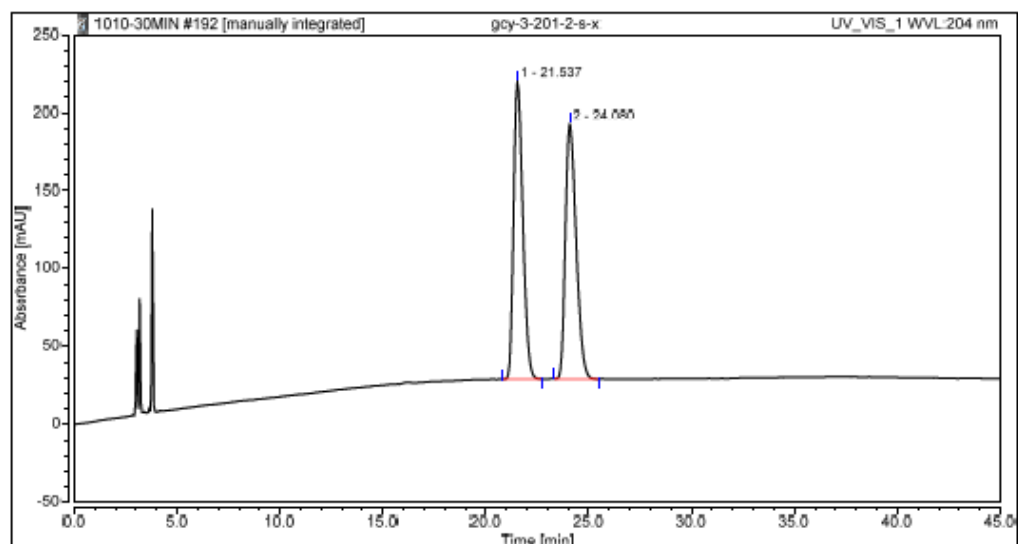

| No.    | Peak Name | Retention Time min | Area mAU*min | Height mAU | Relative Area % | Relative Height % | Amount |
|--------|-----------|--------------------|--------------|------------|-----------------|-------------------|--------|
| 1      |           | 21.537             | 99.393       | 191.368    | 50.08           | 53.87             | n.a.   |
| 2      |           | 24.080             | 99.057       | 163.887    | 49.92           | 46.13             | n.a.   |
| Total: |           |                    | 198.450      | 355.255    | 100.00          | 100.00            |        |

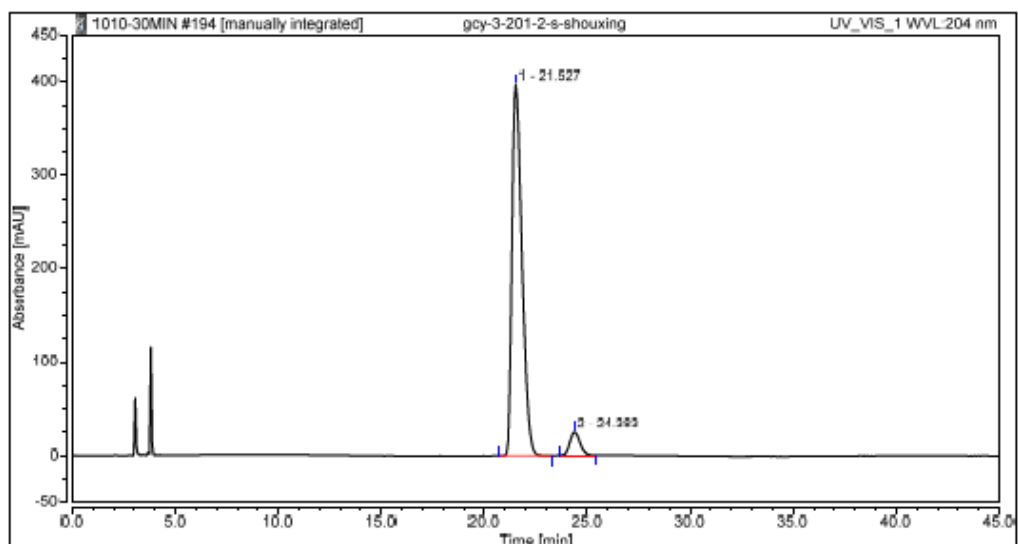

| No.    | Peak Name | Retention Time min | Area mAU*min | Height mAU | Relative Area % | Relative Height % | Amount |
|--------|-----------|--------------------|--------------|------------|-----------------|-------------------|--------|
| 1      |           | 21.527             | 223.831      | 398.088    | 93.95           | 94.03             | n.a.   |
| 2      |           | 24.383             | 14.413       | 25.267     | 6.05            | 5.97              | n.a.   |
| Total: |           |                    | 238.244      | 423.355    | 100.00          | 100.00            |        |

**(R)-phenyl-2-phenylpropanoate (2o):**

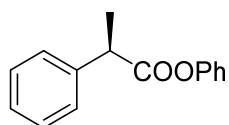

Column DAICEL Chiralcel OJ-H 5 $\mu$ m, heptane/i-PrOH 90:10, flow rate 1.0 mL/min, 25 °C, UV 204 nm

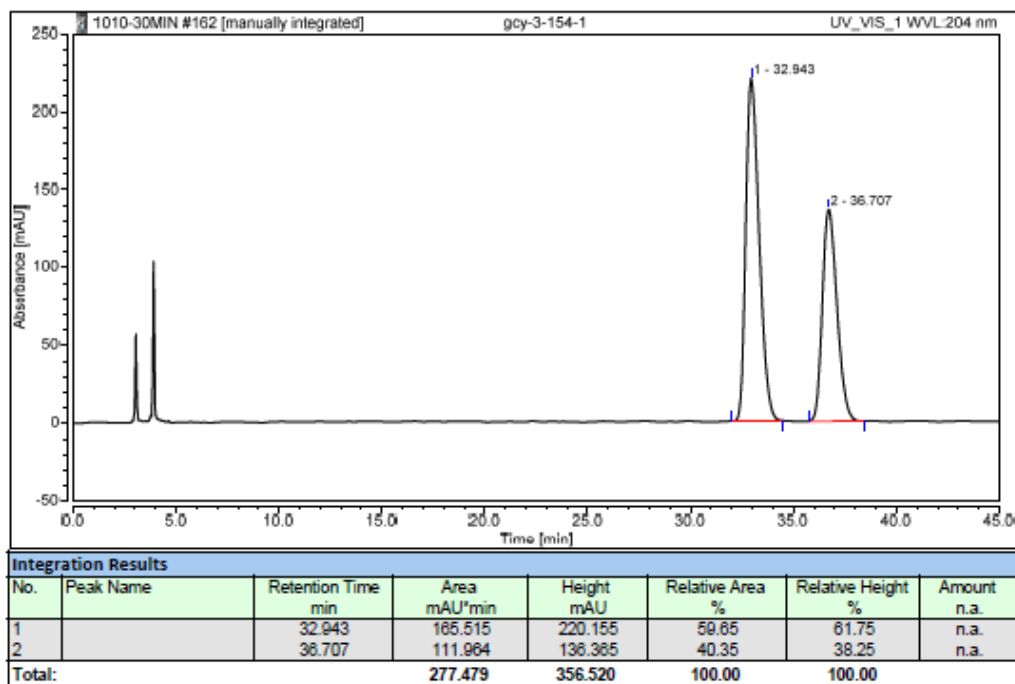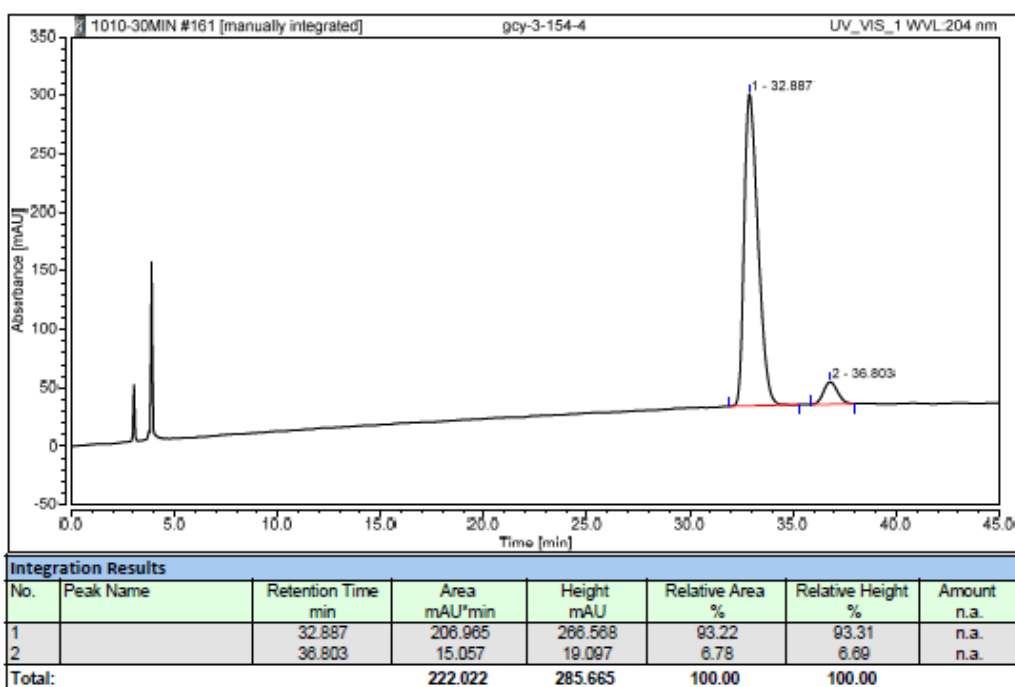

**(R)-phenyl-2-phenylpentanoate (2p):**

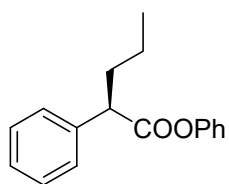

Column DAICEL Chiralcel OJ-H 5 $\mu$ m, heptane/i-PrOH 90:10, flow rate 1.0 mL/min, 25 °C, UV 204 nm

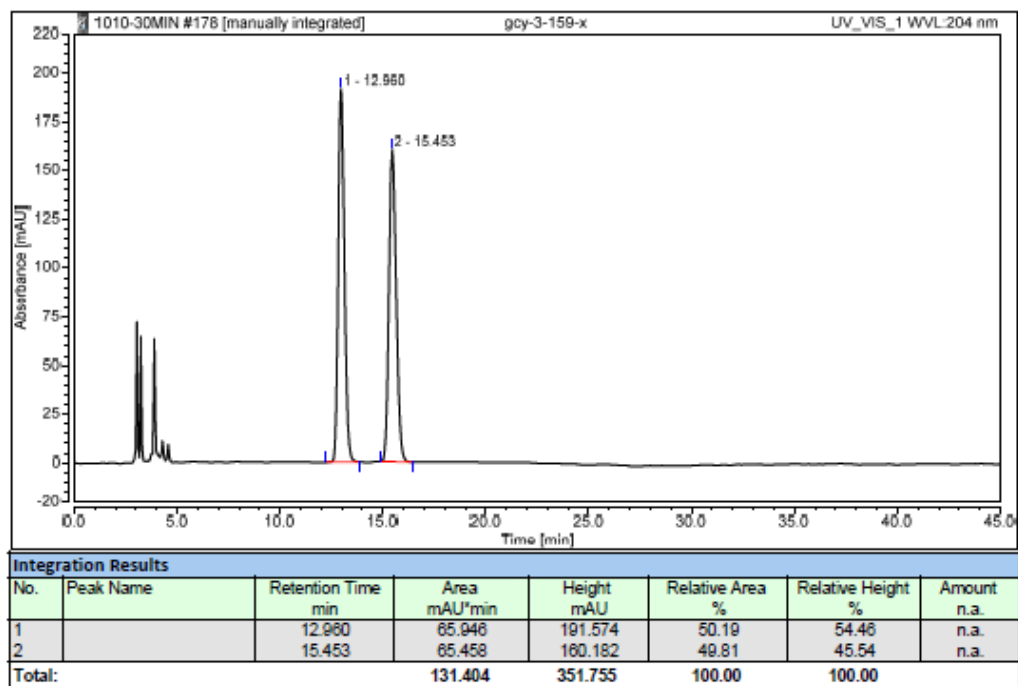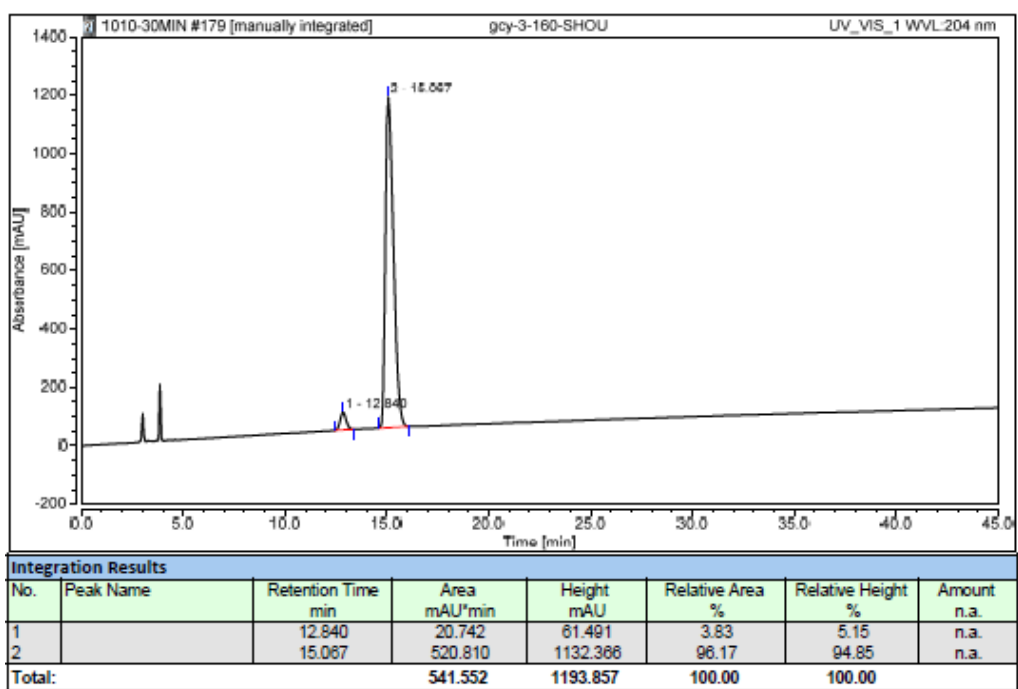

**(R)-phenyl-5-bromo-2-phenylpentanoate (2q):**

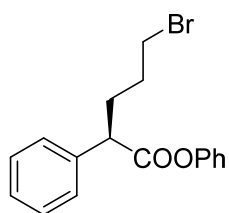

Column DAICEL Chiralcel OJ-H 5 $\mu$ m, heptane/i-PrOH 85:15, flow rate 1.0 mL/min, 25 °C, UV 204 nm

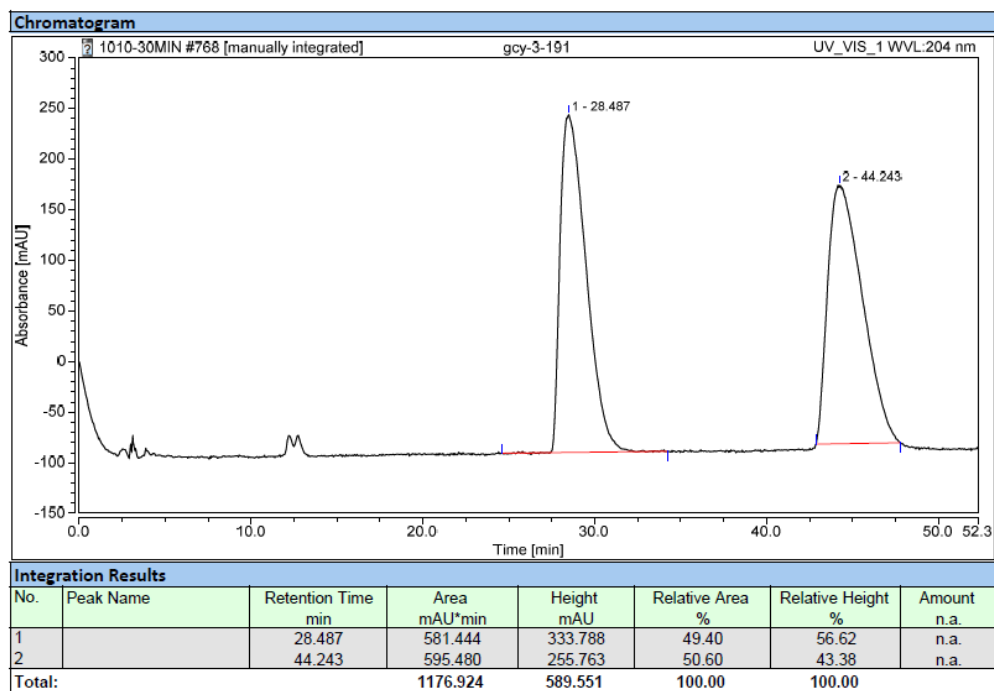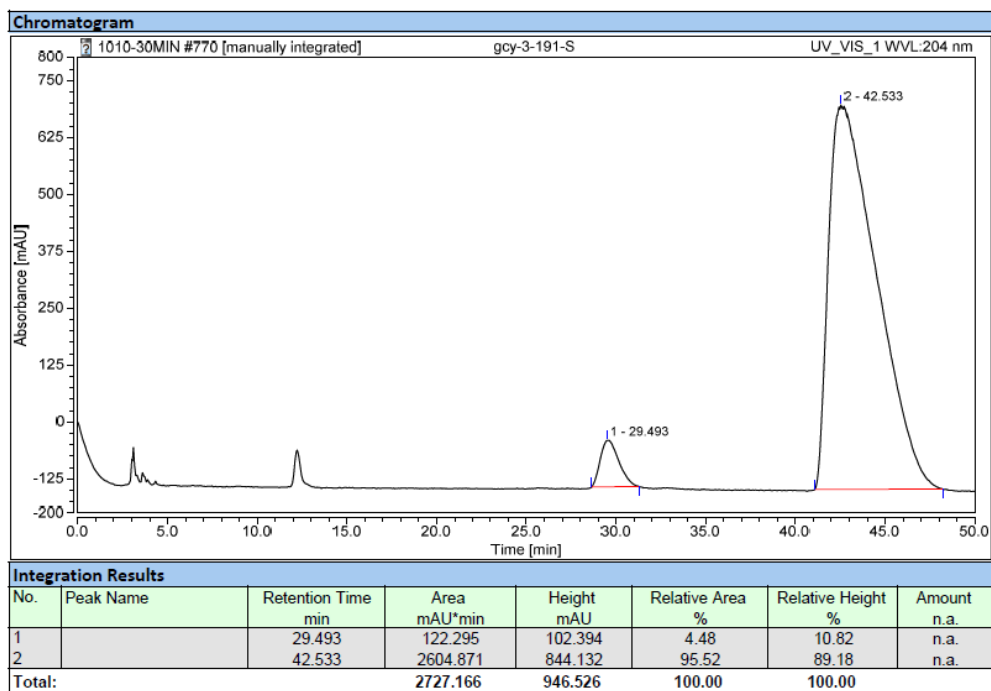



**(R)-phenyl-5-azido-2-phenylpentanoate (2r):**

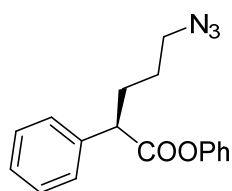

Column DAICEL Chiralcel OJ-H 5 $\mu$ m, heptane/i-PrOH 70:30, flow rate 1.0 mL/min, 35 °C, UV 204 nm

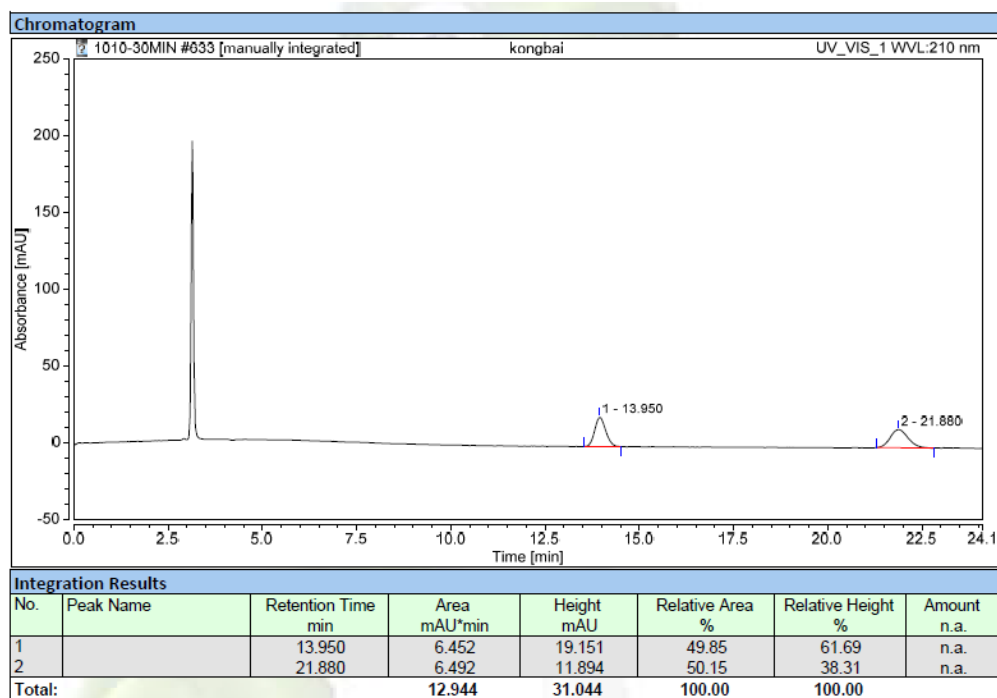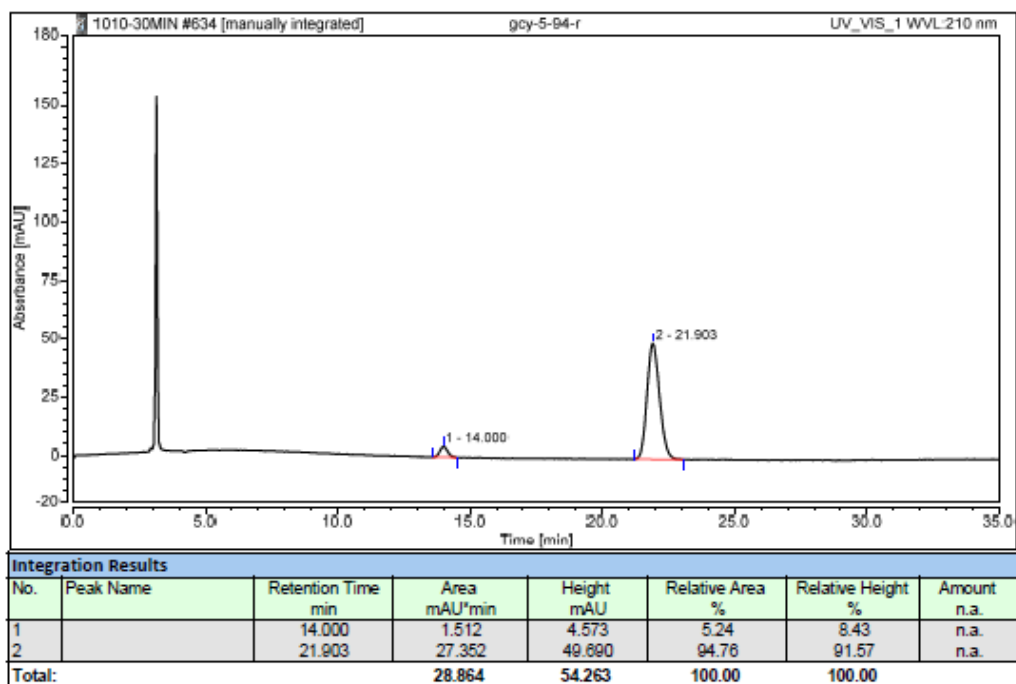

**(R)-phenyl-2-phenylpent-4-enoate (2s):**

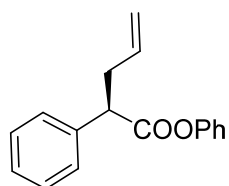

Column DAICEL Chiralcel OJ-H 5 $\mu$ m, heptane/i-PrOH 95:5, flow rate 1.0 mL/min, 25 °C, UV 204 nm

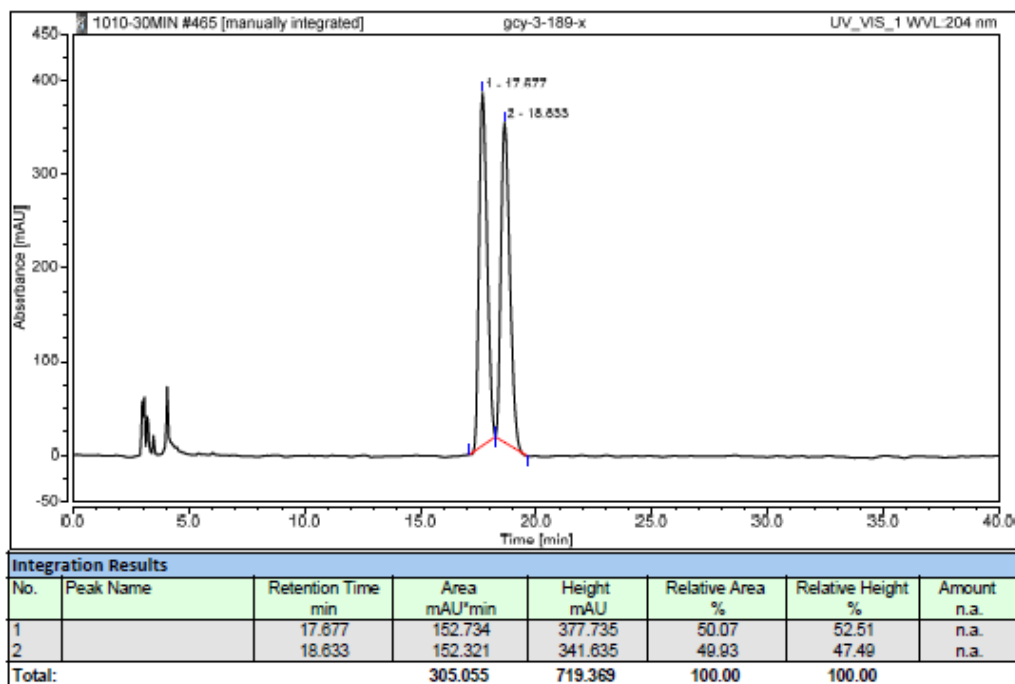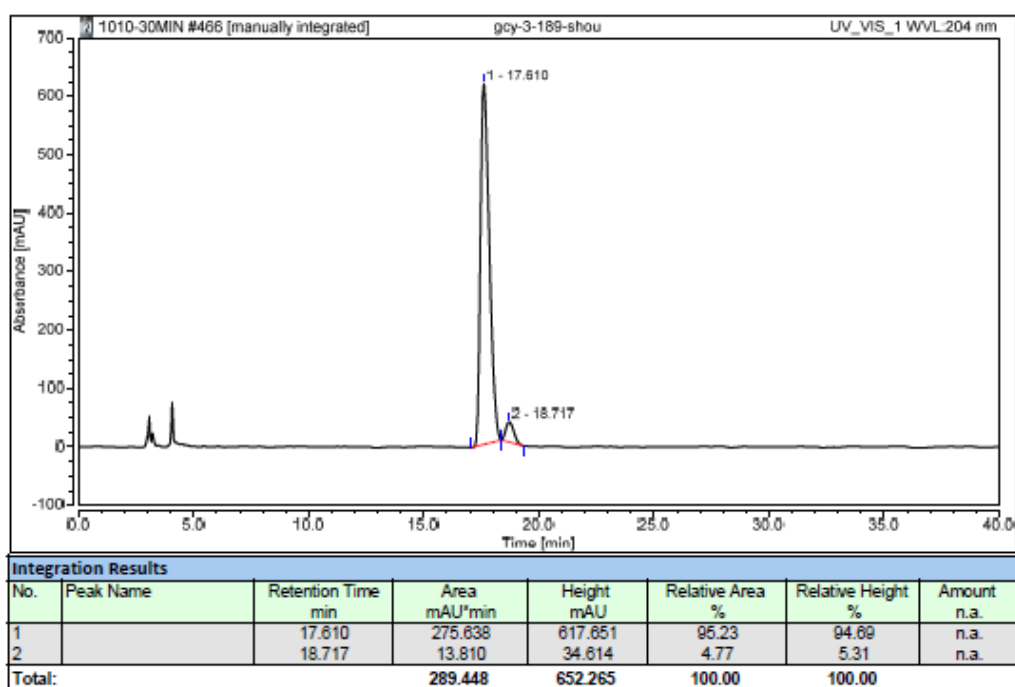

**(R)-phenyl-2-(4-isobutylphenyl) propanoate (2t):**

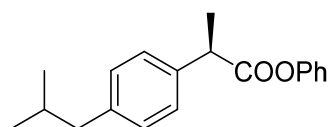

Column DAICEL Chiralcel OJ-H 5 $\mu$ m, heptane/*i*-PrOH 99:1, flow rate 1.0 mL/min, 25 °C, UV 210 nm

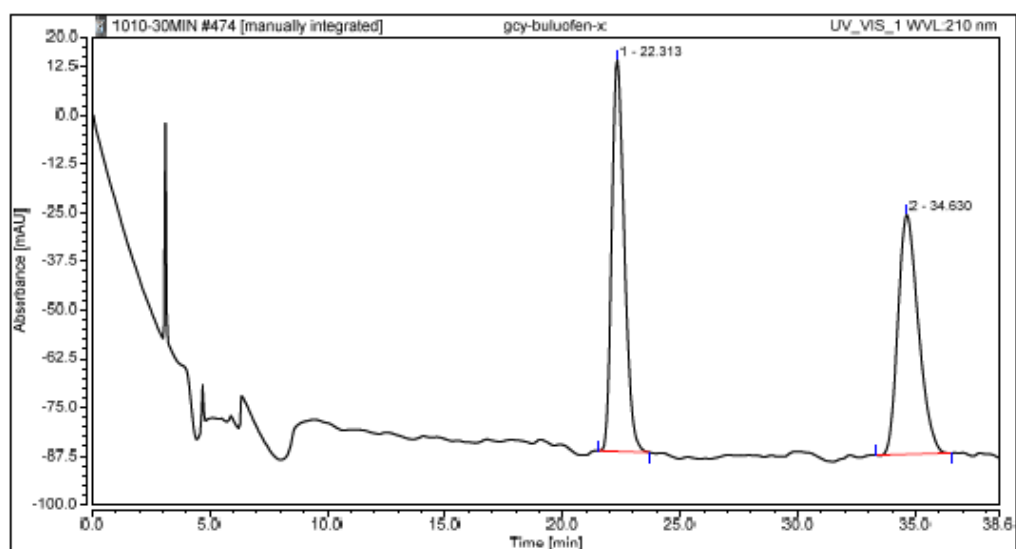

| Integration Results |           |                       |                 |               |                    |                      |                |
|---------------------|-----------|-----------------------|-----------------|---------------|--------------------|----------------------|----------------|
| No.                 | Peak Name | Retention Time<br>min | Area<br>mAU*min | Height<br>mAU | Relative Area<br>% | Relative Height<br>% | Amount<br>n.a. |
| 1                   |           | 22.313                | 62.222          | 100.285       | 50.22              | 62.02                | n.a.           |
| 2                   |           | 34.630                | 61.669          | 61.412        | 49.78              | 37.98                | n.a.           |
| Total:              |           |                       | 123.891         | 161.697       | 100.00             | 100.00               |                |

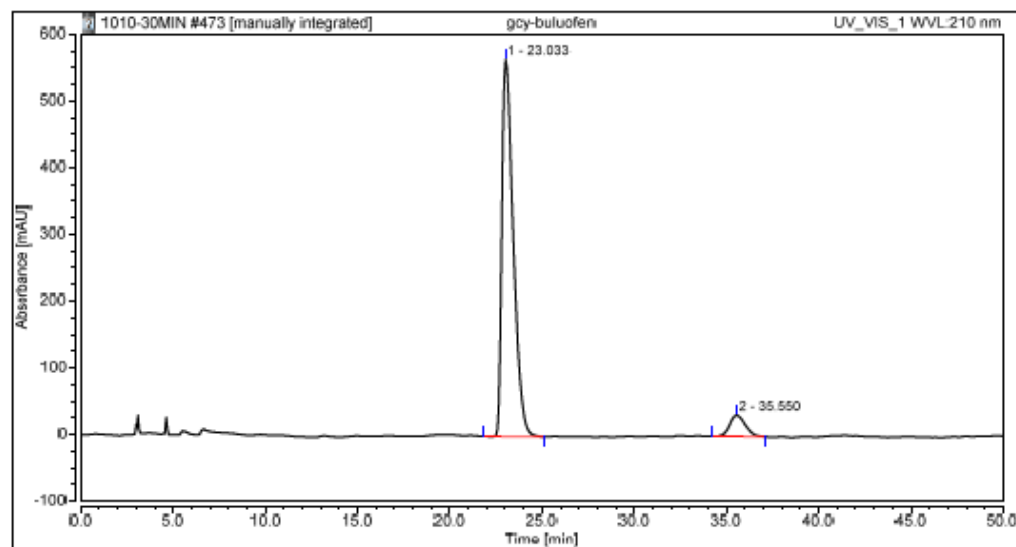

| Integration Results |           |                       |                 |               |                    |                      |                |
|---------------------|-----------|-----------------------|-----------------|---------------|--------------------|----------------------|----------------|
| No.                 | Peak Name | Retention Time<br>min | Area<br>mAU*min | Height<br>mAU | Relative Area<br>% | Relative Height<br>% | Amount<br>n.a. |
| 1                   |           | 23.033                | 404.214         | 565.013       | 92.88              | 94.68                | n.a.           |
| 2                   |           | 35.550                | 30.975          | 31.747        | 7.12               | 5.32                 | n.a.           |
| Total:              |           |                       | 435.189         | 596.760       | 100.00             | 100.00               |                |

**(R)-phenyl-2-(4-isobutylphenyl) butanoate (2u):**

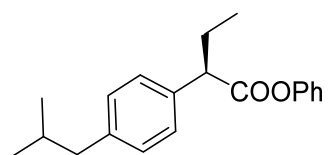

Column DAICEL Chiralcel OJ-H 5 $\mu$ m, heptane/i-PrOH 98:2, flow rate 1.0 mL/min, 25 °C, UV 204 nm

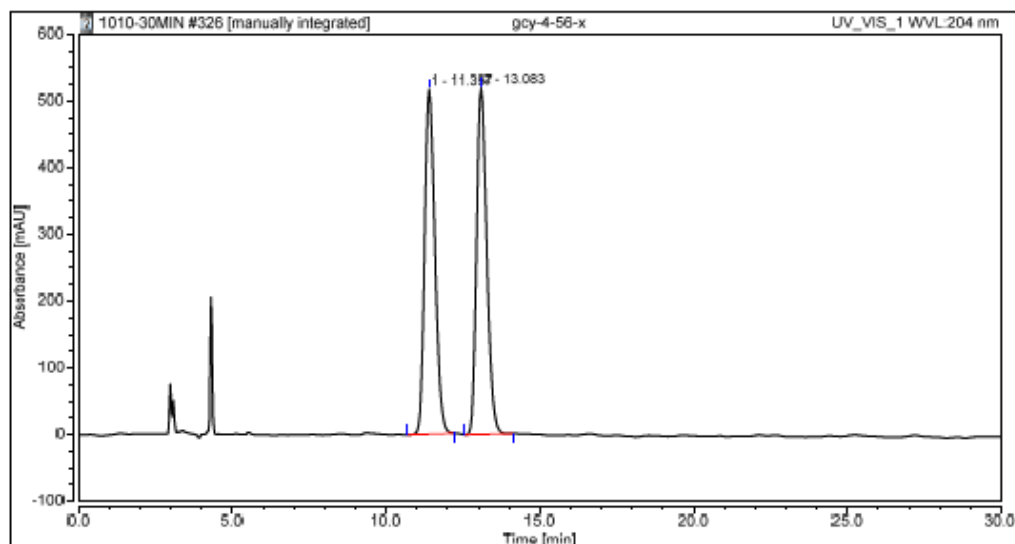

| Integration Results |           |                    |              |            |                 |                   |        |
|---------------------|-----------|--------------------|--------------|------------|-----------------|-------------------|--------|
| No.                 | Peak Name | Retention Time min | Area mAU*min | Height mAU | Relative Area % | Relative Height % | Amount |
| 1                   |           | 11.397             | 199.212      | 516.949    | 49.98           | 49.89             | n.a.   |
|                     |           | 13.083             | 199.356      | 519.218    | 50.02           | 50.11             | n.a.   |
| Total:              |           |                    | 398.567      | 1036.167   | 100.00          | 100.00            |        |

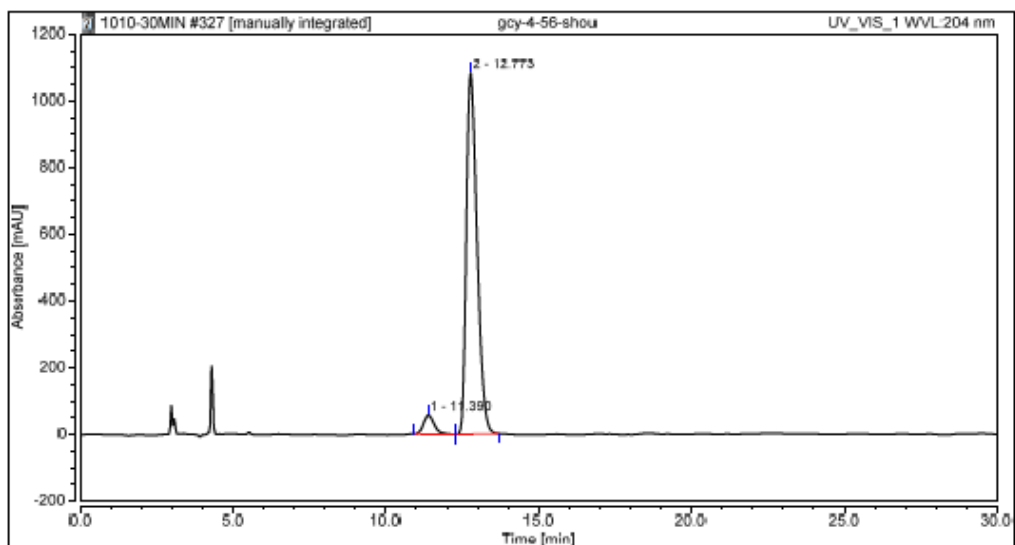

| Integration Results |           |                    |              |            |                 |                   |        |
|---------------------|-----------|--------------------|--------------|------------|-----------------|-------------------|--------|
| No.                 | Peak Name | Retention Time min | Area mAU*min | Height mAU | Relative Area % | Relative Height % | Amount |
| 1                   |           | 11.390             | 22.919       | 56.252     | 4.99            | 4.94              | n.a.   |
| 2                   |           | 12.773             | 436.432      | 1082.256   | 95.01           | 95.06             | n.a.   |
| Total:              |           |                    | 459.351      | 1138.508   | 100.00          | 100.00            |        |

**(R)-phenyl-2-(3-phenoxyphenyl) propanoate (2v):**

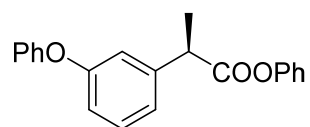

Column DAICEL Chiralcel OJ-H 5 $\mu$ m, heptane/i-PrOH 80:20, flow rate 1.0 mL/min, 25 °C, UV 204 nm

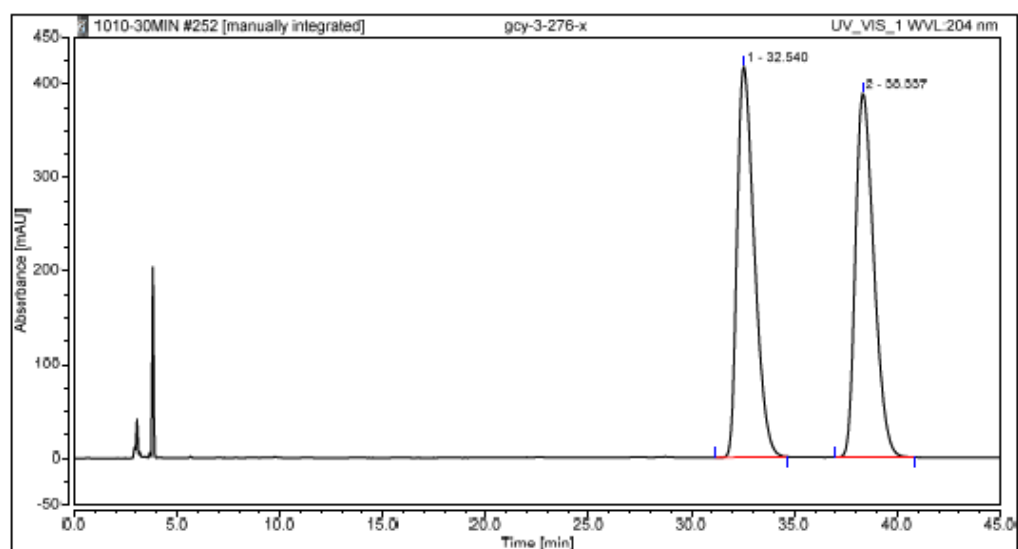

| No.    | Peak Name | Retention Time min | Area mAU*min | Height mAU | Relative Area % | Relative Height % | Amount |
|--------|-----------|--------------------|--------------|------------|-----------------|-------------------|--------|
| 1      |           | 32.540             | 403.407      | 417.520    | 49.92           | 51.76             | n.a.   |
| 2      |           | 38.337             | 404.647      | 389.095    | 50.08           | 48.24             | n.a.   |
| Total: |           |                    | 808.054      | 806.614    | 100.00          | 100.00            |        |

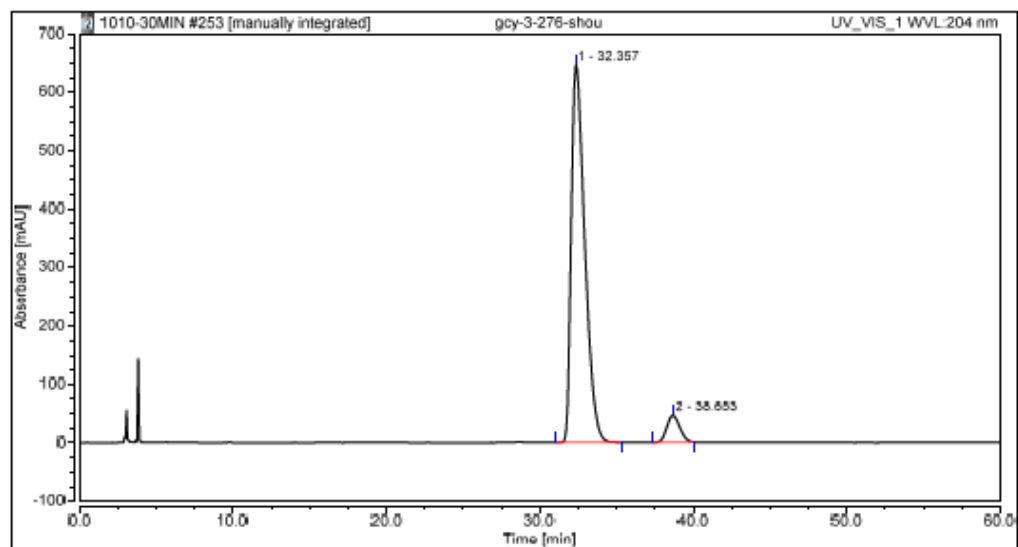

| No.    | Peak Name | Retention Time min | Area mAU*min | Height mAU | Relative Area % | Relative Height % | Amount |
|--------|-----------|--------------------|--------------|------------|-----------------|-------------------|--------|
| 1      |           | 32.357             | 667.526      | 646.145    | 93.56           | 93.34             | n.a.   |
| 2      |           | 38.653             | 45.260       | 46.094     | 6.44            | 6.66              | n.a.   |
| Total: |           |                    | 702.786      | 692.238    | 100.00          | 100.00            |        |

phenyl 2-methyl-3-phenylpropanoate (2w):

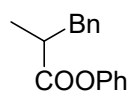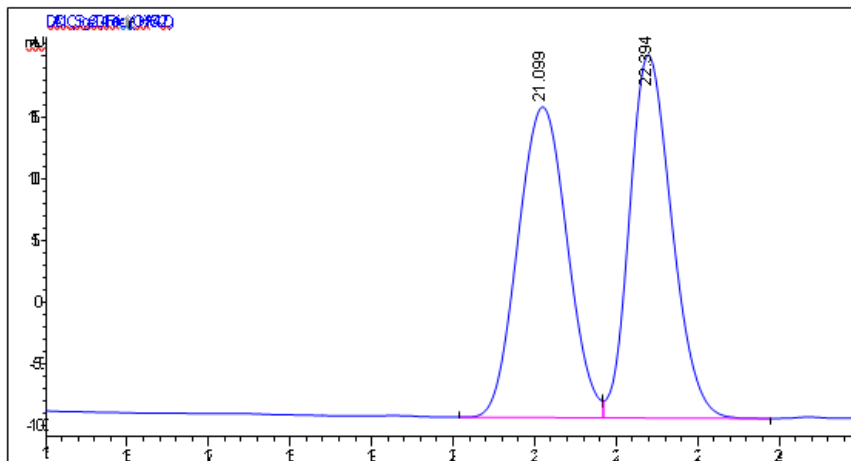

| No | Peak Name | Retention Time<br>min | Area<br>mAU*mi | Height<br>mAU | Relative Area<br>% | Relative Height<br>% | Amount<br>n.a |
|----|-----------|-----------------------|----------------|---------------|--------------------|----------------------|---------------|
| 1  |           | 21.099                | 501.5          | 251.9         | 49.971             | 49.971               | n.a           |
| 2  |           | 22.394                | 473.1          | 294.6         | 50.029             | 50.029               | n.a           |

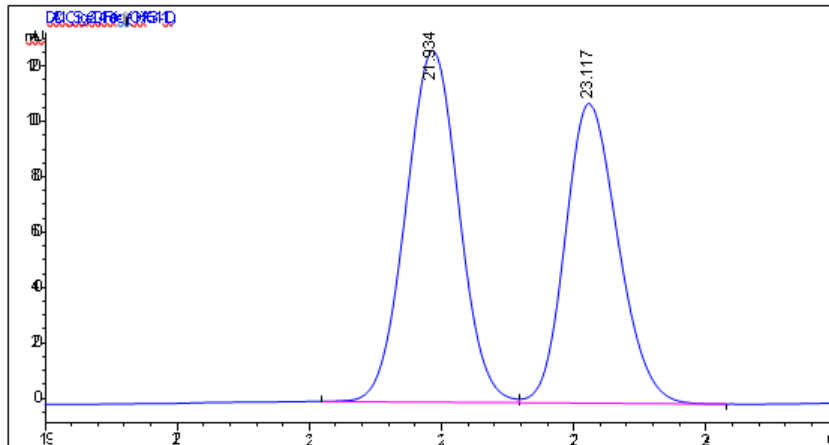

| No | Peak Name | Retention Time<br>min | Area<br>mAU*mi | Height<br>mAU | Relative Area<br>% | Relative Height<br>% | Amount<br>n.a |
|----|-----------|-----------------------|----------------|---------------|--------------------|----------------------|---------------|
| 1  |           | 21.934                | 161.6          | 127.1         | 54.117             | 54.117               | n.a           |
| 2  |           | 23.117                | 130.1          | 108.4         | 45.883             | 45.883               | n.a           |

**(R)-benzyl-2-phenylbutanoate (2b):**

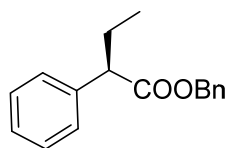

Column DAICEL Chiralcel OD-H 5 $\mu$ m, heptane/i-PrOH 98:2, flow rate 1.0 mL/min, 25 °C, UV 204 nm

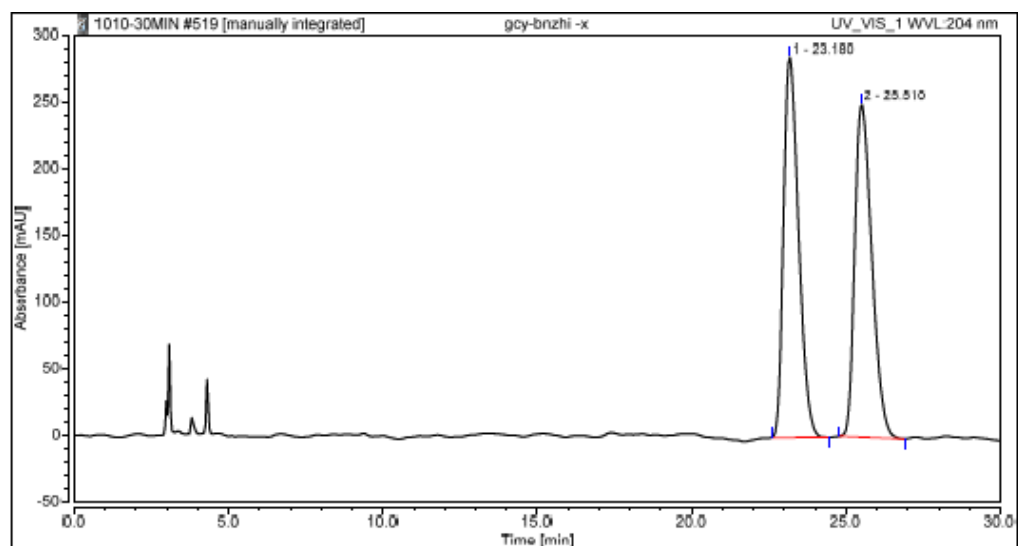

| Integration Results |           |                       |                 |               |                    |                      |                |
|---------------------|-----------|-----------------------|-----------------|---------------|--------------------|----------------------|----------------|
| No.                 | Peak Name | Retention Time<br>min | Area<br>mAU*min | Height<br>mAU | Relative Area<br>% | Relative Height<br>% | Amount<br>n.a. |
| 1                   |           | 23.180                | 160.943         | 284.763       | 50.12              | 53.32                | n.a.           |
| 2                   |           | 25.510                | 160.143         | 249.306       | 49.88              | 46.68                | n.a.           |
| Total:              |           |                       | 321.086         | 534.069       | 100.00             | 100.00               |                |

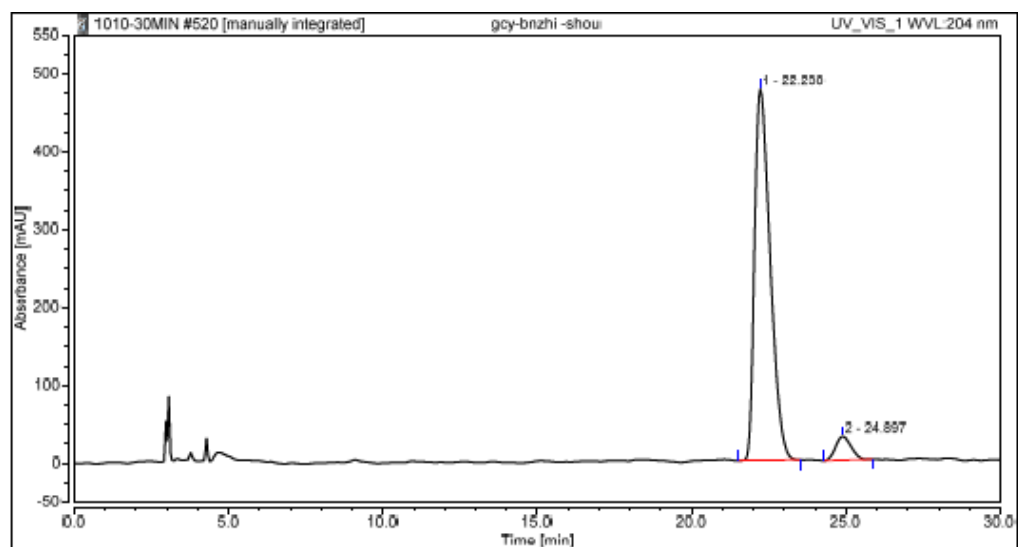

| Integration Results |           |                       |                 |               |                    |                      |                |
|---------------------|-----------|-----------------------|-----------------|---------------|--------------------|----------------------|----------------|
| No.                 | Peak Name | Retention Time<br>min | Area<br>mAU*min | Height<br>mAU | Relative Area<br>% | Relative Height<br>% | Amount<br>n.a. |
| 1                   |           | 22.230                | 278.580         | 476.467       | 94.06              | 93.98                | n.a.           |
| 2                   |           | 24.897                | 17.600          | 30.530        | 5.94               | 6.02                 | n.a.           |
| Total:              |           |                       | 296.180         | 506.997       | 100.00             | 100.00               |                |

**(R)-ethyl-2-phenylbutanoate (2c):**

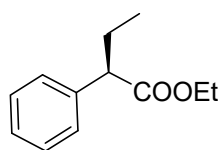

Column DAICEL Chiralcel OD-H 5 $\mu$ m, heptane/*i*-PrOH 99.8:0.2, flow rate 1.0 mL/min, 25 °C, UV 204 nm

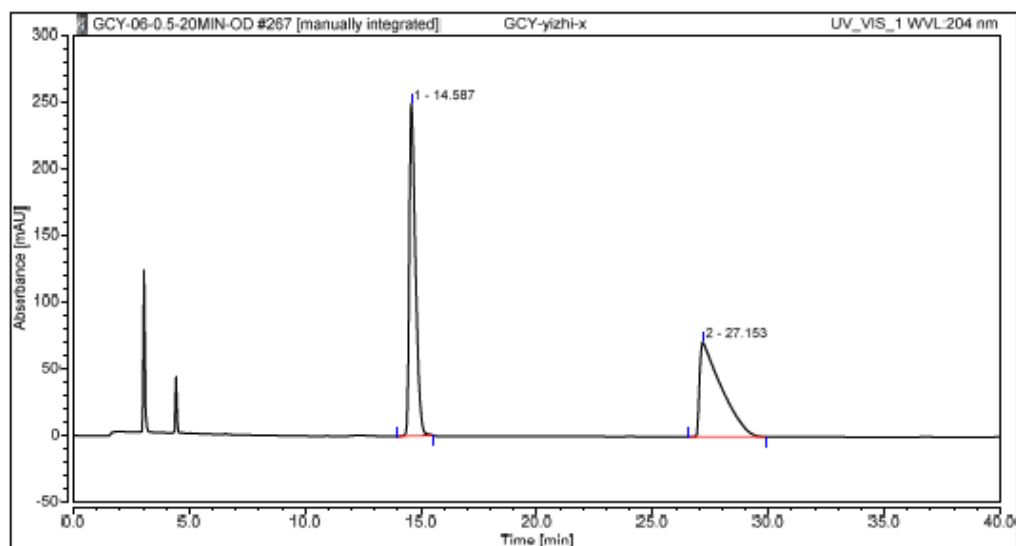

| Integration Results |           |                    |              |            |                 |                   |        |
|---------------------|-----------|--------------------|--------------|------------|-----------------|-------------------|--------|
| No.                 | Peak Name | Retention Time min | Area mAU*min | Height mAU | Relative Area % | Relative Height % | Amount |
| 1                   |           | 14.587             | 77.151       | 248.869    | 50.22           | 77.83             | n.a.   |
| 2                   |           | 27.153             | 76.475       | 70.894     | 49.78           | 22.17             | n.a.   |
| Total:              |           |                    | 153.626      | 319.763    | 100.00          | 100.00            |        |

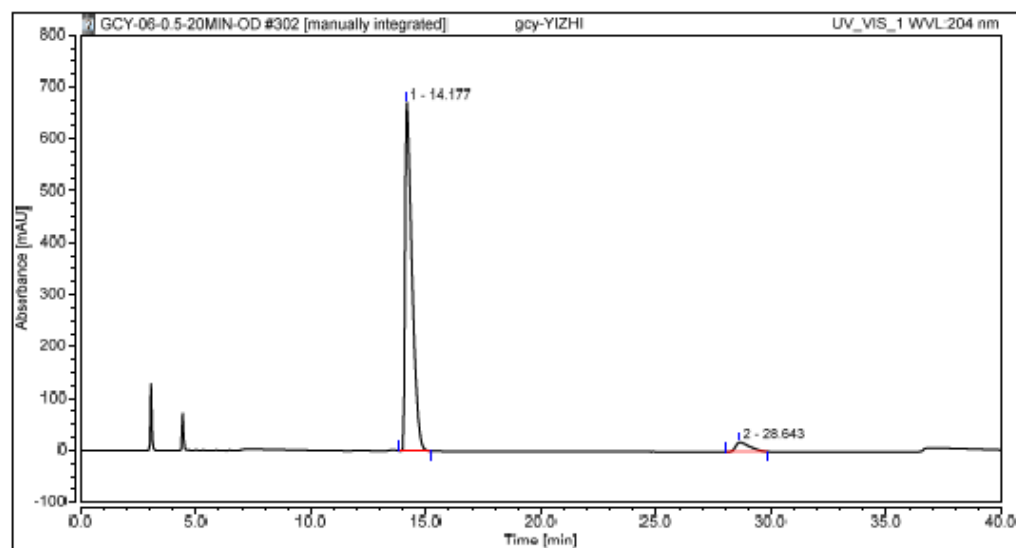

| Integration Results |           |                    |              |            |                 |                   |        |
|---------------------|-----------|--------------------|--------------|------------|-----------------|-------------------|--------|
| No.                 | Peak Name | Retention Time min | Area mAU*min | Height mAU | Relative Area % | Relative Height % | Amount |
| 1                   |           | 14.177             | 232.221      | 670.084    | 94.87           | 97.37             | n.a.   |
| 2                   |           | 28.643             | 12.550       | 18.087     | 5.13            | 2.63              | n.a.   |
| Total:              |           |                    | 244.770      | 688.151    | 100.00          | 100.00            |        |



**(R)-2-phenylbutanoic acid (3a):**

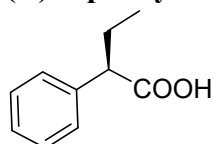

Column DAICEL Chiralcel OJ-H 5 $\mu$ m, heptane/i-PrOH/CF<sub>3</sub>COOH 95:4:1, flow rate 1.0 mL/min, 25 °C, UV 204 nm

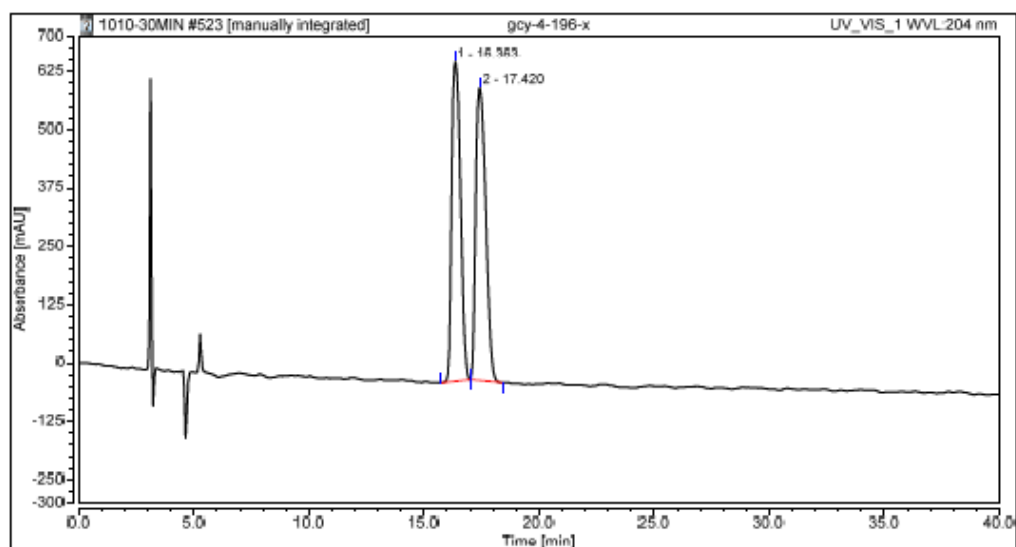

| No.    | Peak Name | Retention Time min | Area mAU*min | Height mAU | Relative Area % | Relative Height % | Amount |
|--------|-----------|--------------------|--------------|------------|-----------------|-------------------|--------|
| 1      |           | 16.363             | 302.143      | 683.458    | 49.01           | 52.21             | n.a.   |
| 2      |           | 17.420             | 314.412      | 625.622    | 50.99           | 47.79             | n.a.   |
| Total: |           |                    | 616.554      | 1309.080   | 100.00          | 100.00            |        |

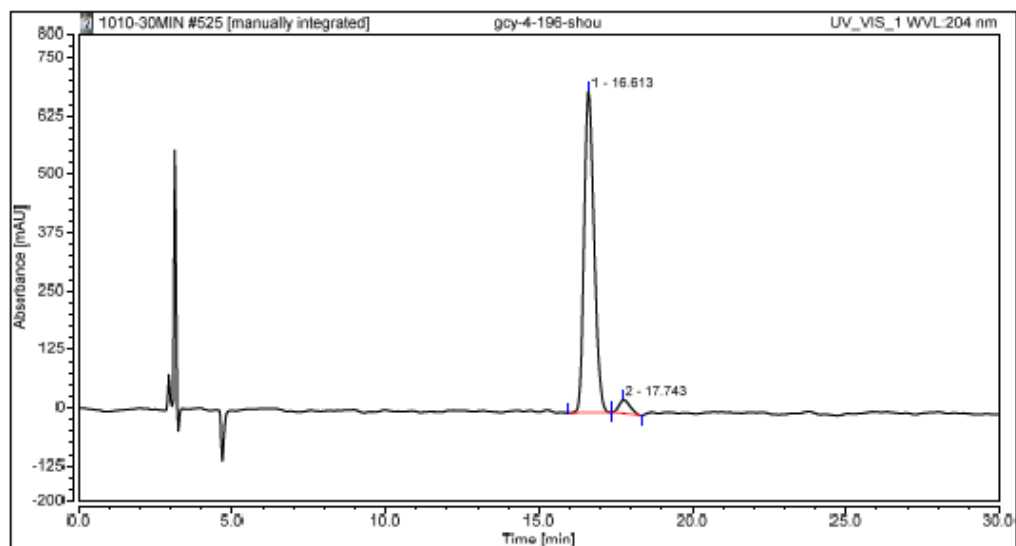

| No.    | Peak Name | Retention Time min | Area mAU*min | Height mAU | Relative Area % | Relative Height % | Amount |
|--------|-----------|--------------------|--------------|------------|-----------------|-------------------|--------|
| 1      |           | 16.613             | 258.042      | 687.405    | 95.56           | 95.99             | n.a.   |
| 2      |           | 17.743             | 12.002       | 28.702     | 4.44            | 4.01              | n.a.   |
| Total: |           |                    | 270.044      | 716.107    | 100.00          | 100.00            |        |

**(S)-phenyl-2-(3-phenoxyphenyl)propanoate:**

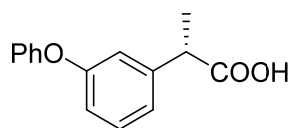

Column DAICEL Chiralcel AD-H 5 $\mu$ m, heptane/*i*-PrOH/CF<sub>3</sub>COOH 90:10:0.1, flow rate 1.0 mL/min, 25 °C, UV 204 nm

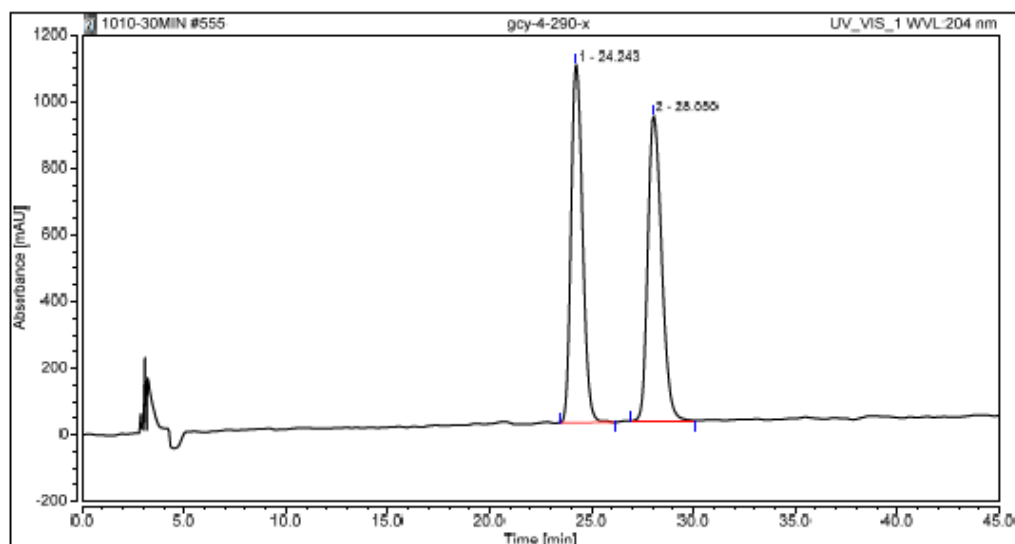

| No.    | Peak Name | Retention Time min | Area mAU*min | Height mAU | Relative Area % | Relative Height % | Amount |
|--------|-----------|--------------------|--------------|------------|-----------------|-------------------|--------|
| 1      |           | 24.243             | 704.267      | 1074.526   | 49.39           | 53.97             | n.a.   |
| 2      |           | 28.050             | 721.704      | 916.399    | 50.61           | 46.03             | n.a.   |
| Total: |           |                    | 1425.971     | 1990.925   | 100.00          | 100.00            |        |

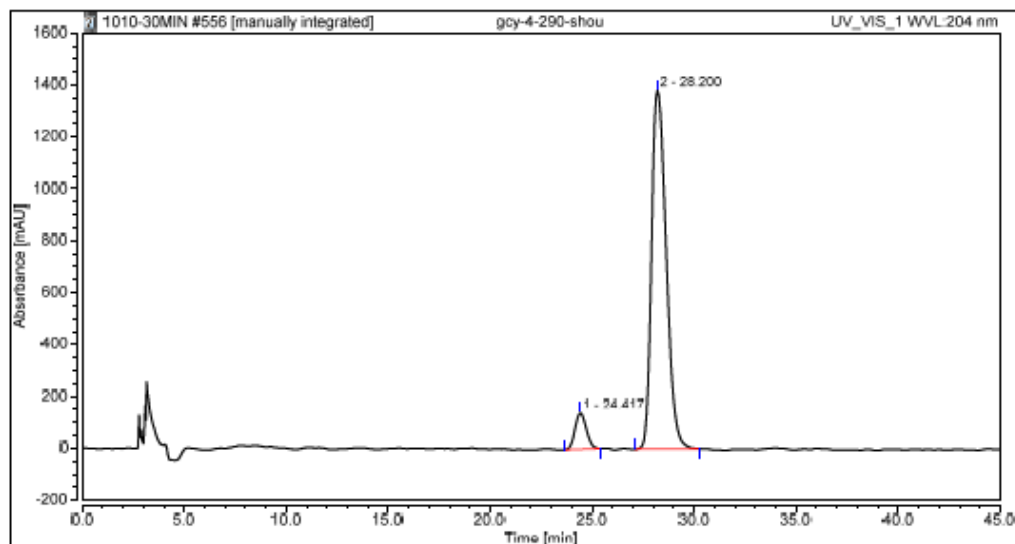

| No.    | Peak Name | Retention Time min | Area mAU*min | Height mAU | Relative Area % | Relative Height % | Amount |
|--------|-----------|--------------------|--------------|------------|-----------------|-------------------|--------|
| 1      |           | 24.417             | 89.259       | 140.355    | 7.22            | 9.22              | n.a.   |
| 2      |           | 28.200             | 1146.745     | 1382.495   | 92.78           | 90.78             | n.a.   |
| Total: |           |                    | 1236.004     | 1522.850   | 100.00          | 100.00            |        |
